# Supplementary material
Source: publisher figshare collection journal article supplement (https://brill.figshare.com/articles/dataset/_/20337825)

# *Acropentias aureus*

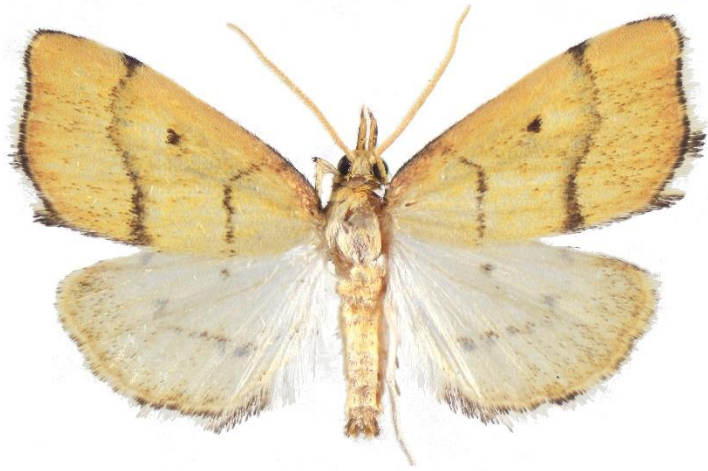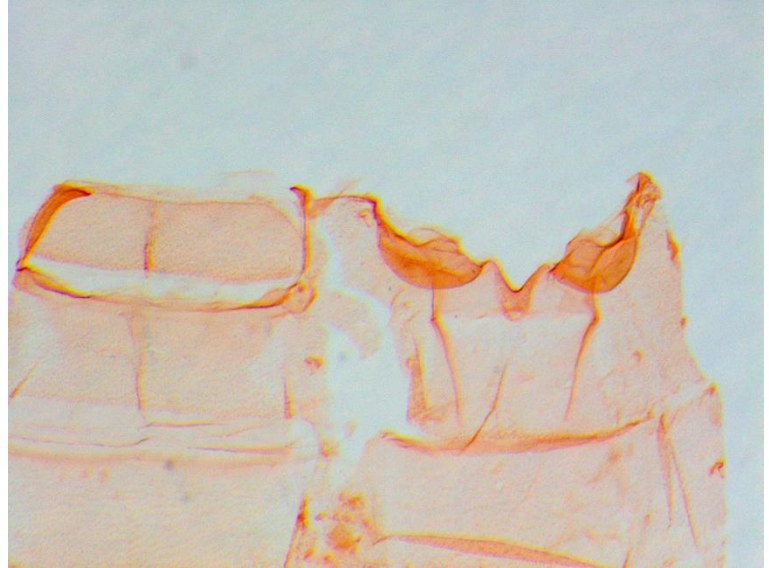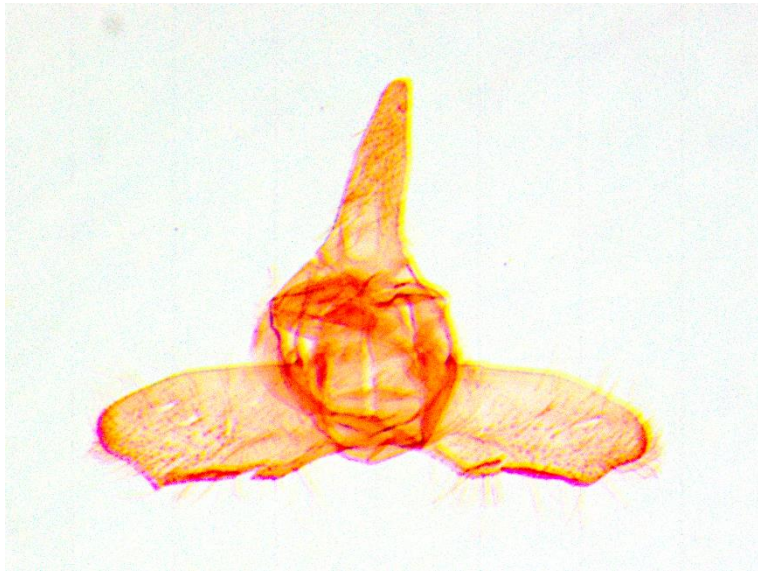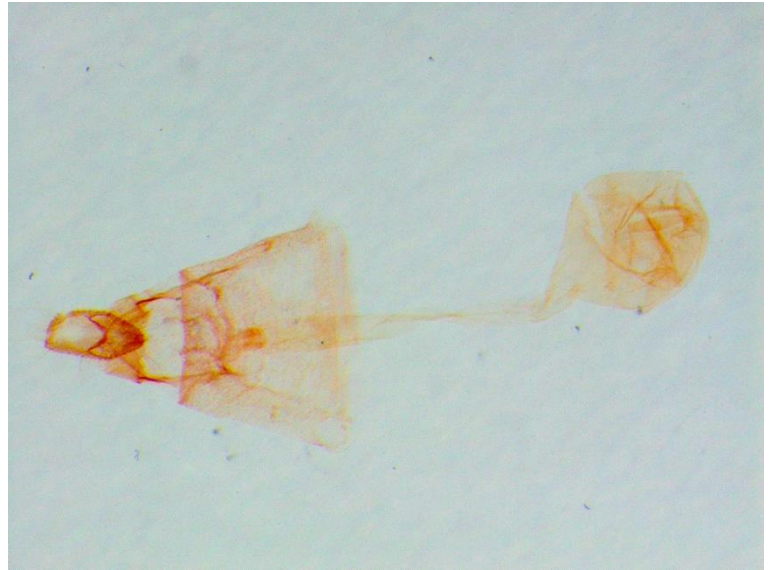

# *Ecpyrrhorrhoe minnehaha*

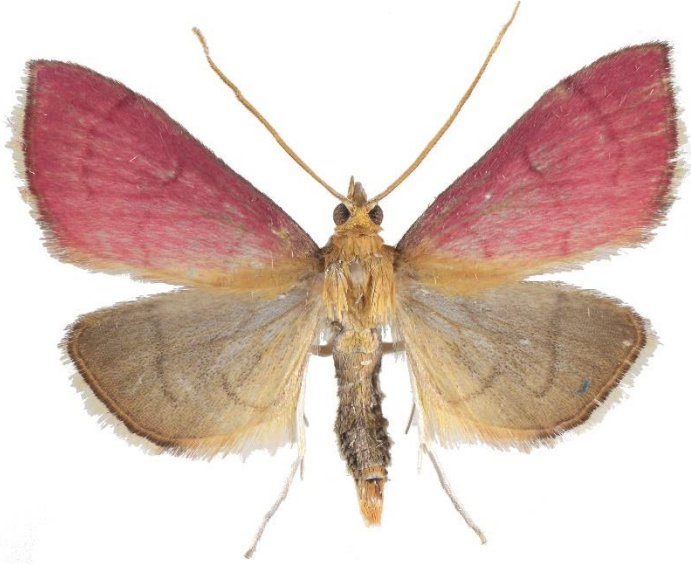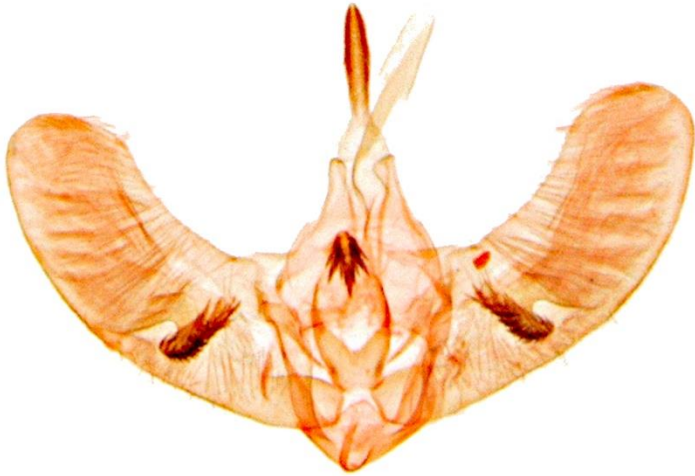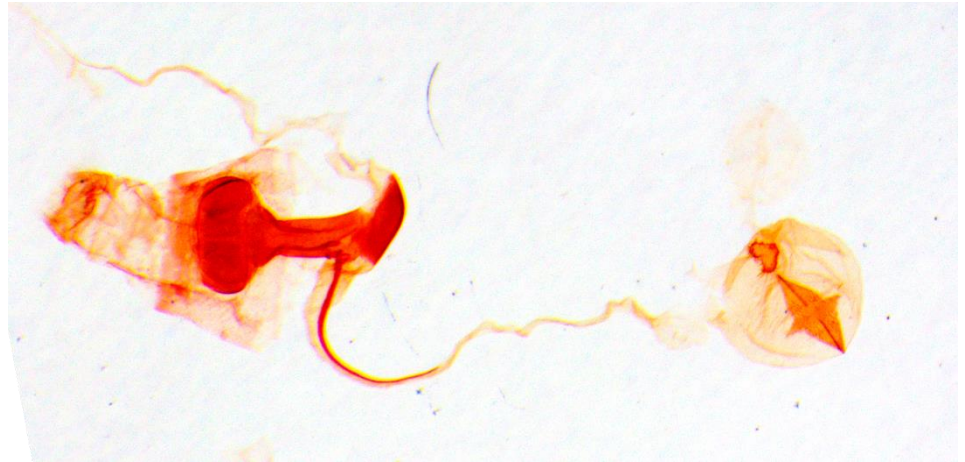



# *Ecpyrrhorrhoe puralis* (*Paliga ochrealis*)

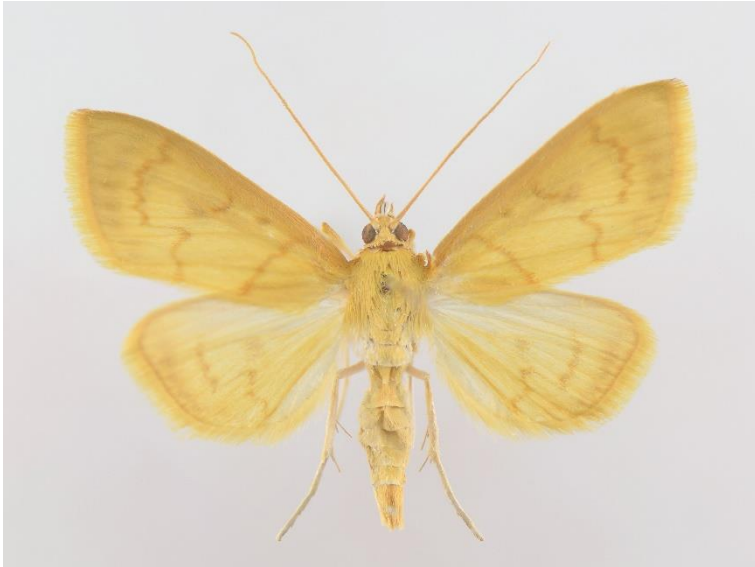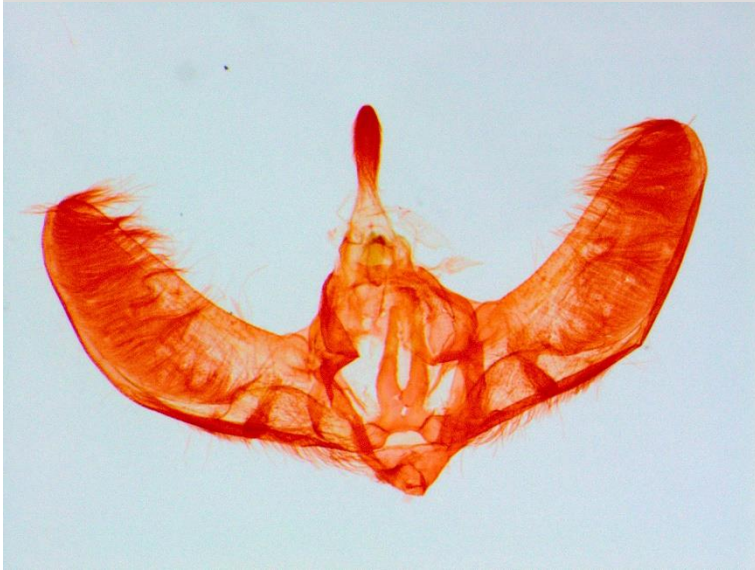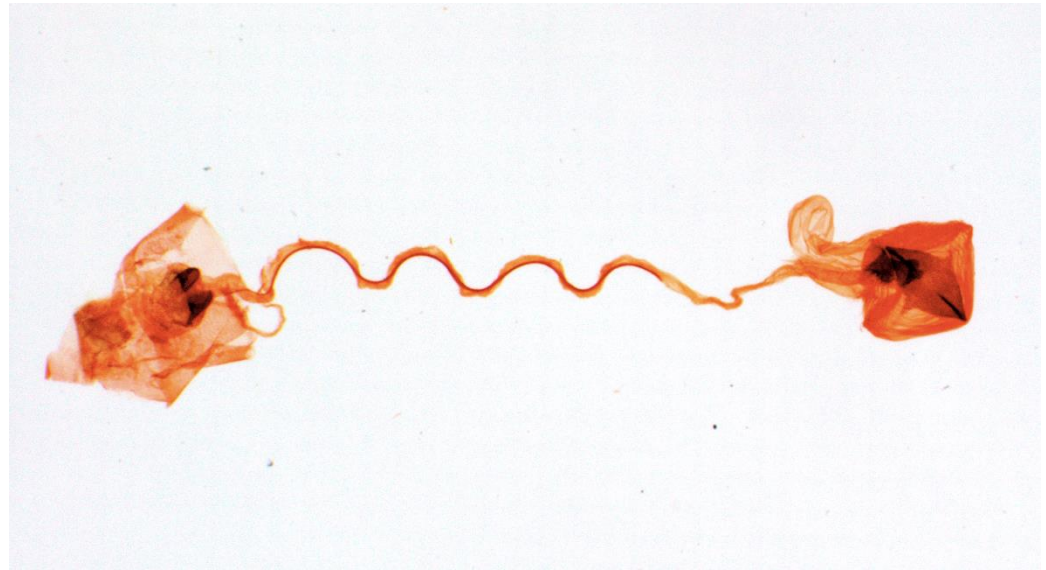

# *Yezobotys dissimilis*

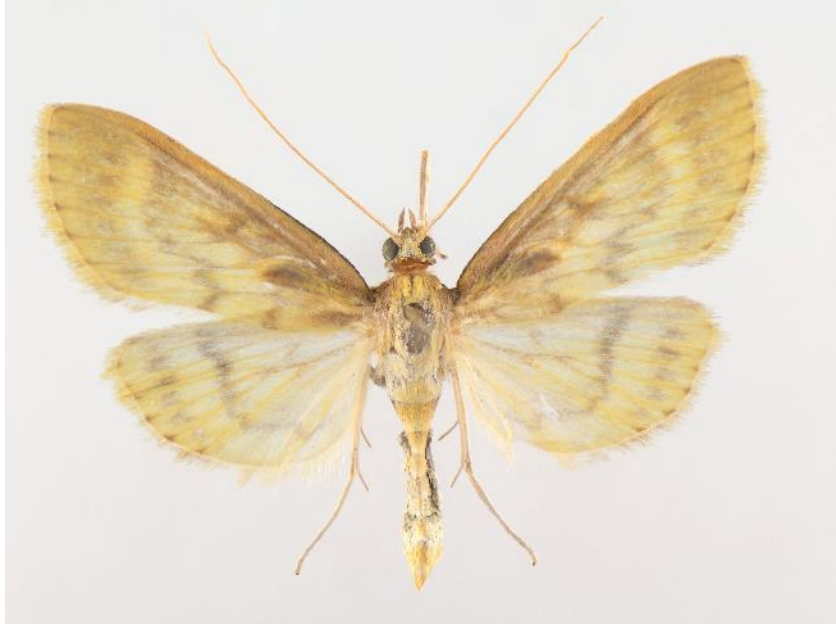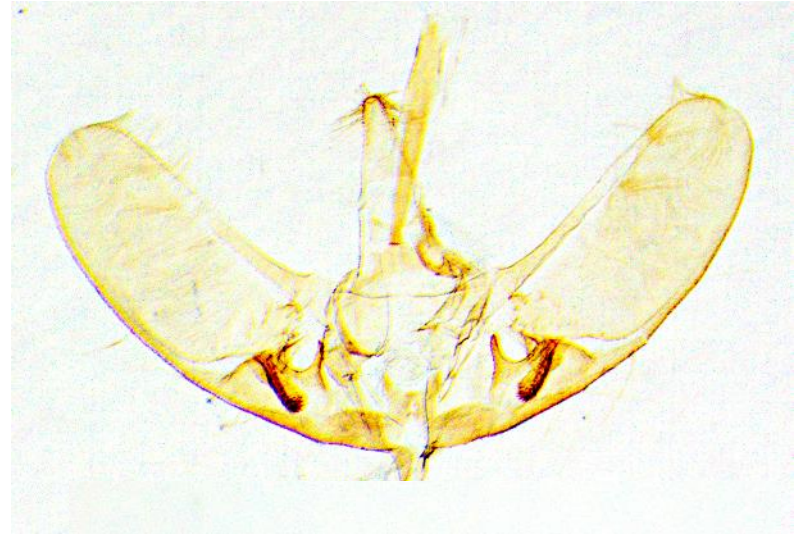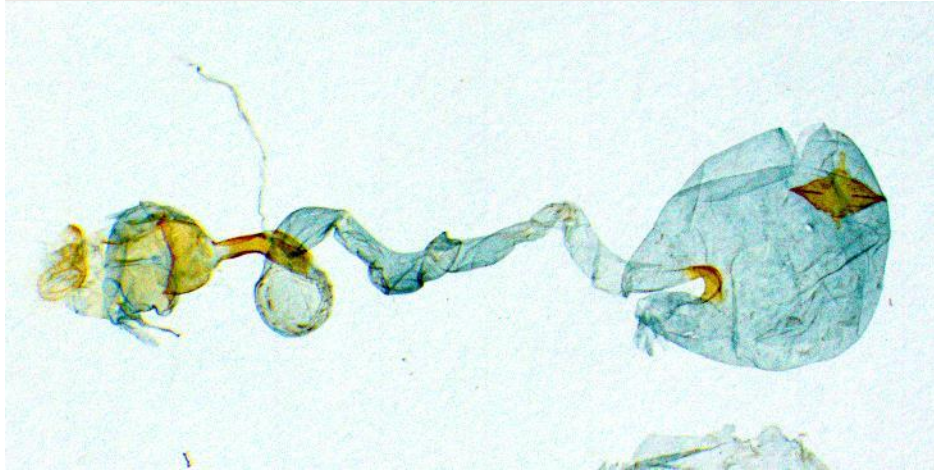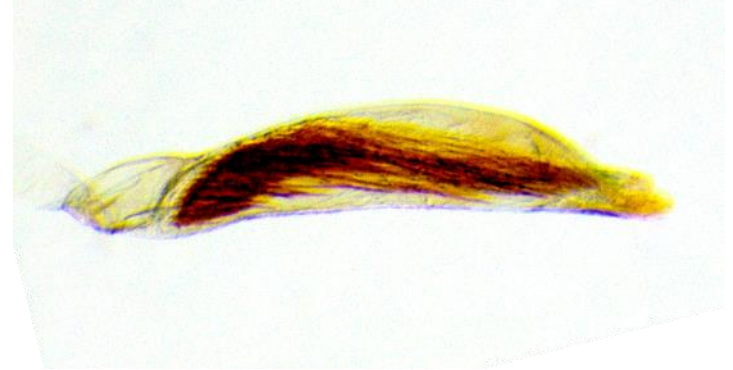



# *Demobotys pervulgalis*

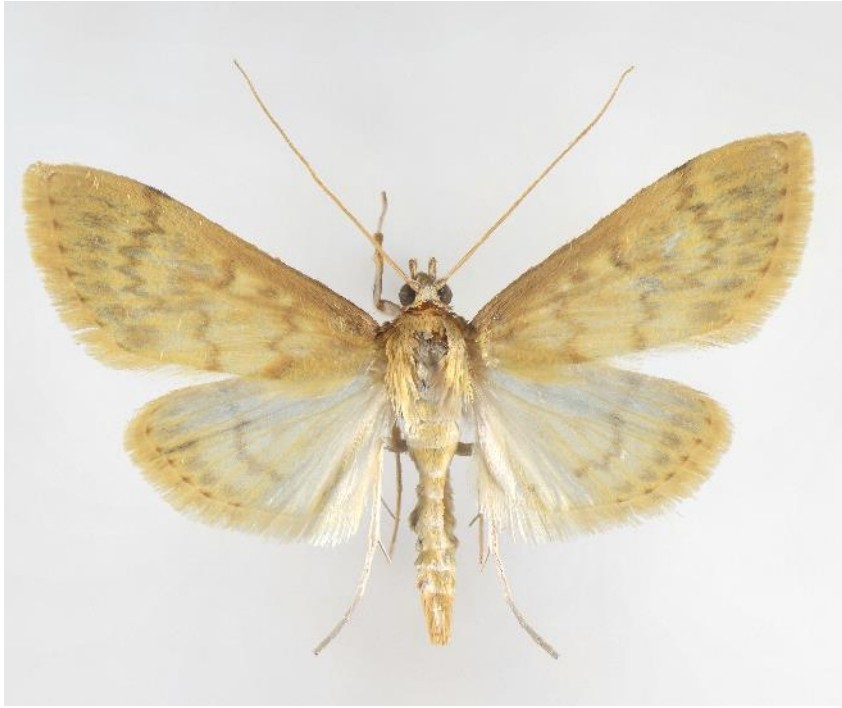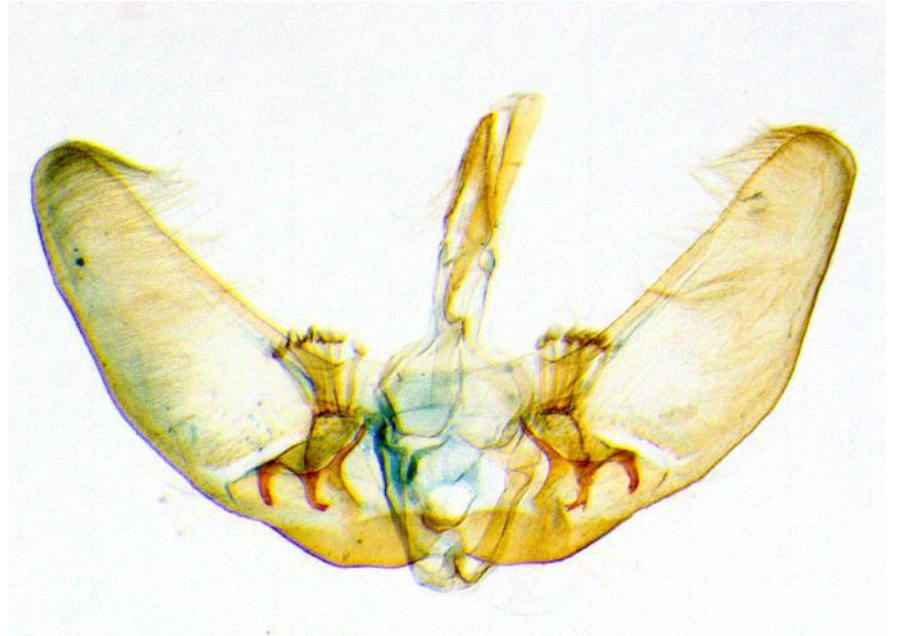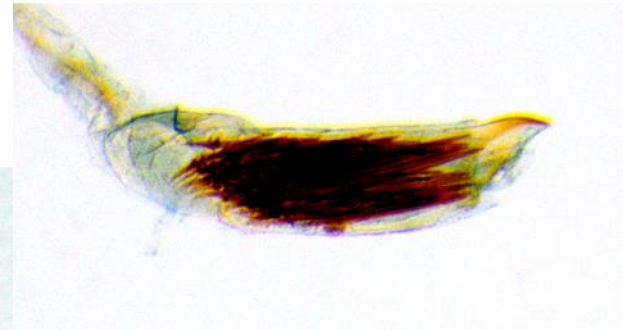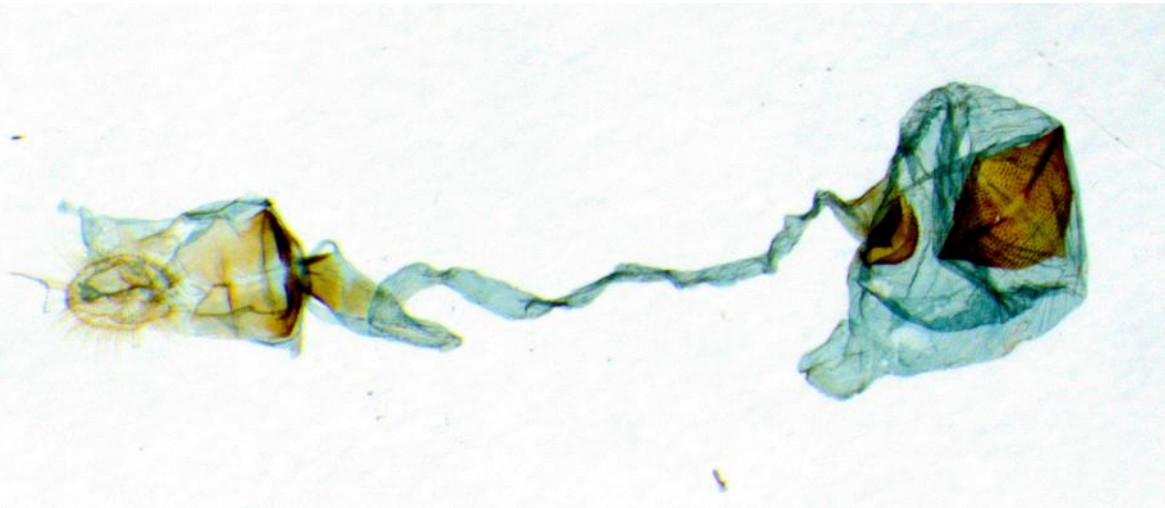

# *Prodasycnemis inornata*

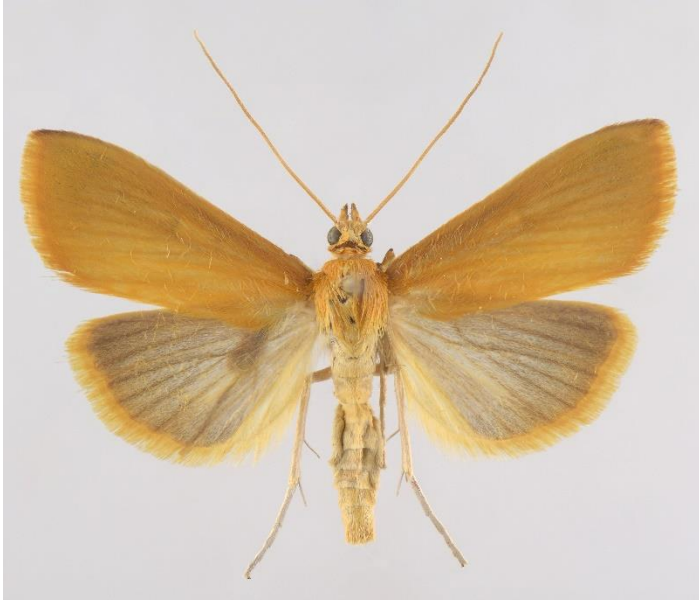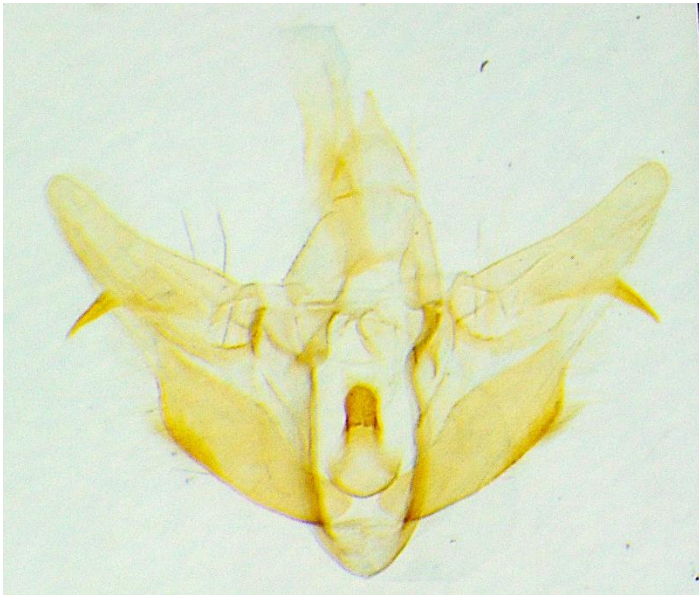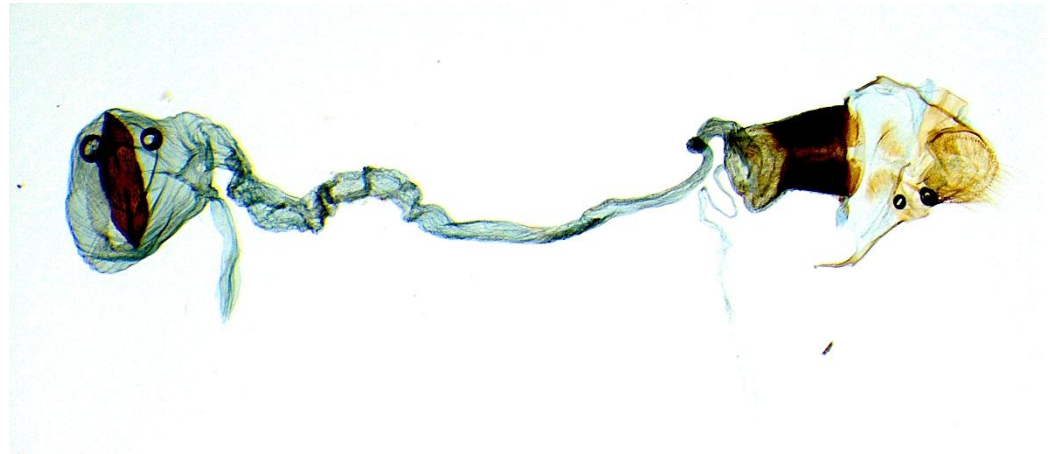



# *Paratalanta taiwanensis*

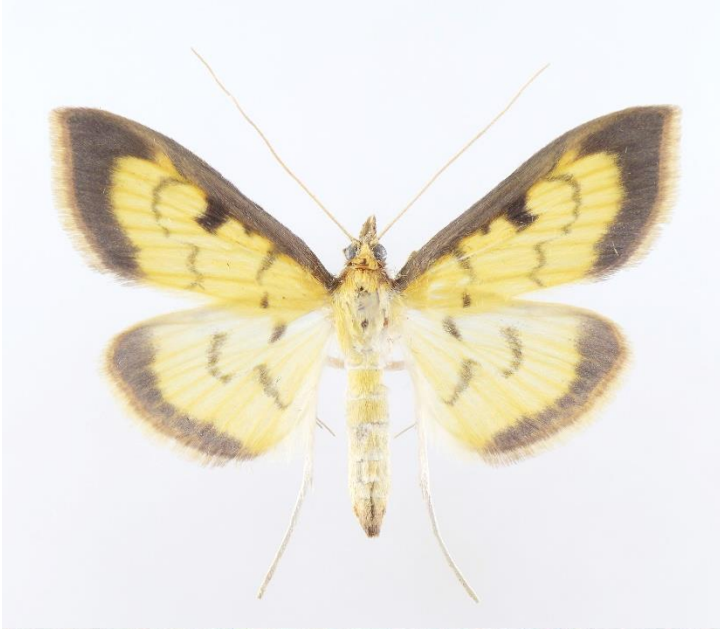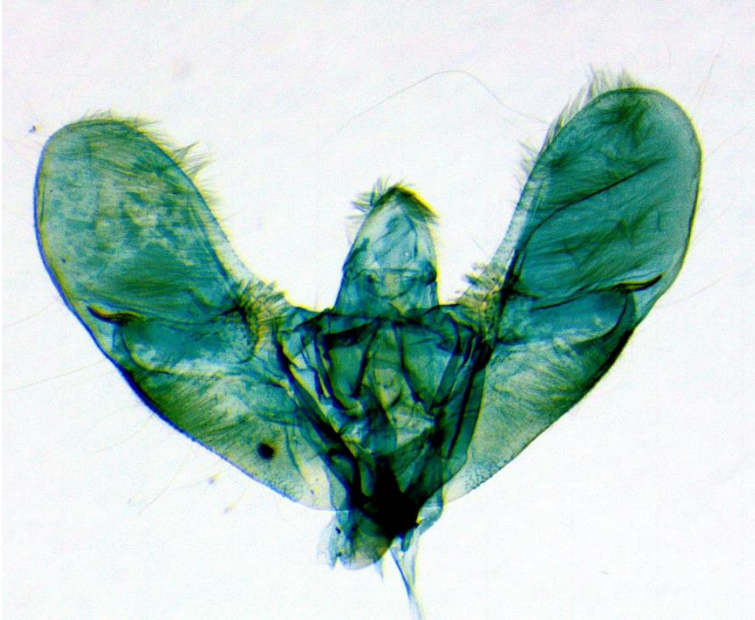

# *Paratalanta pandalis*

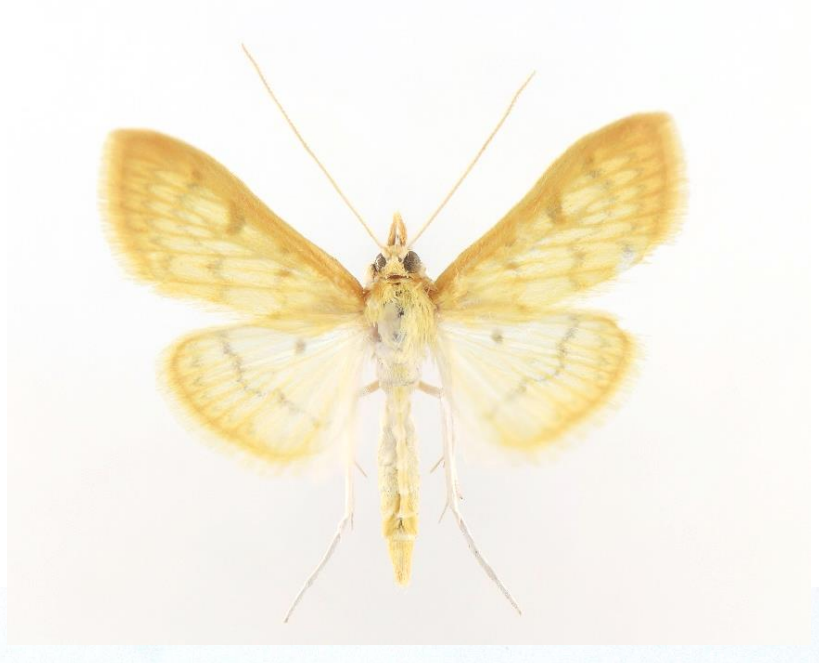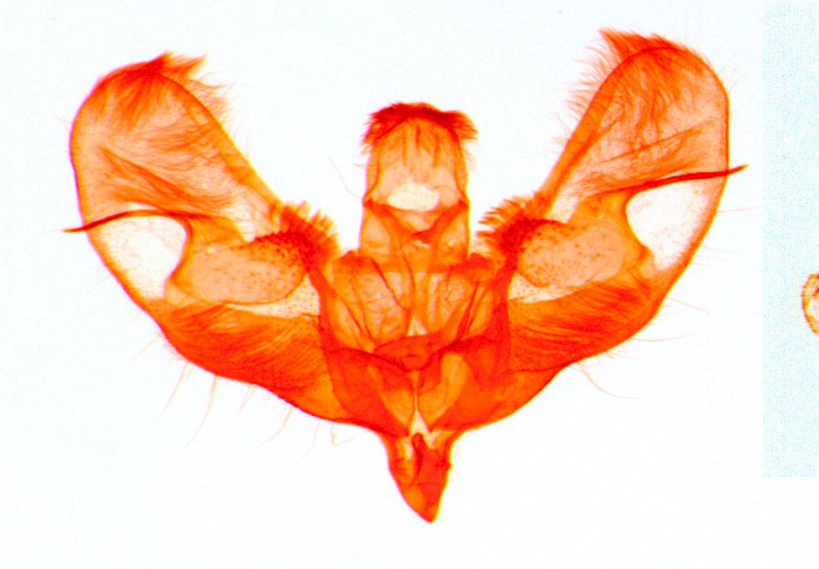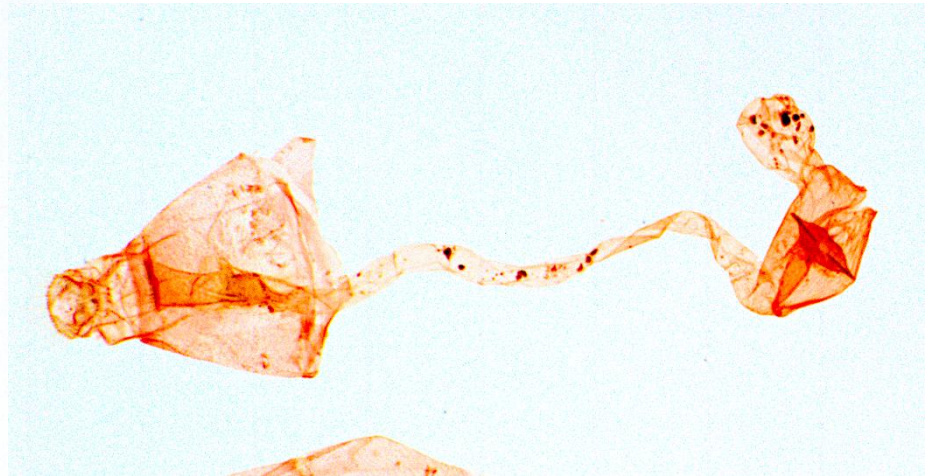



# *Lamprophaia albifimbrialis*

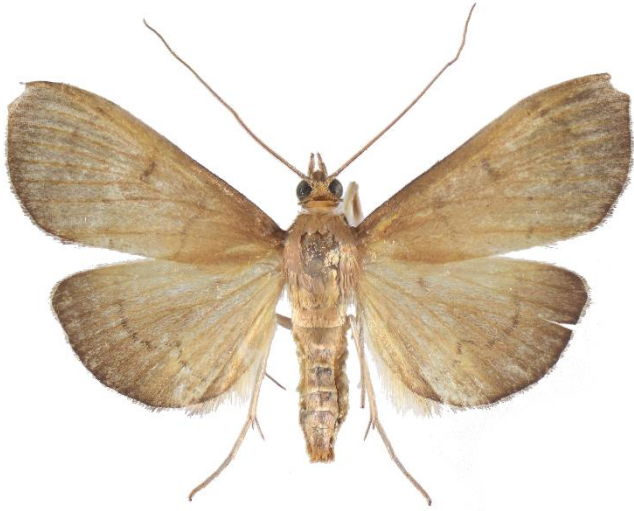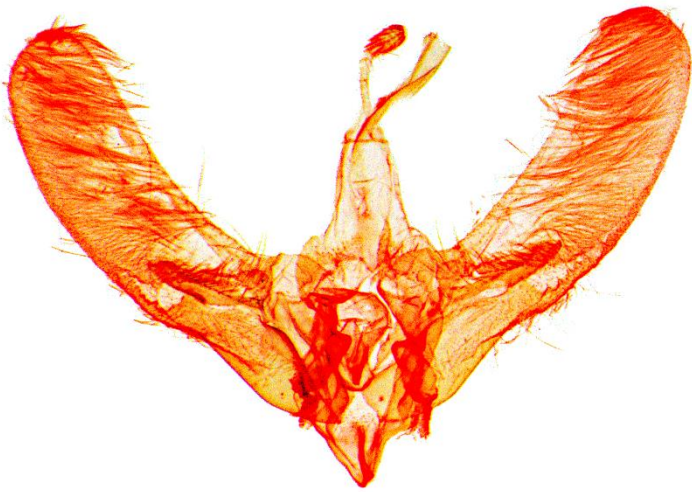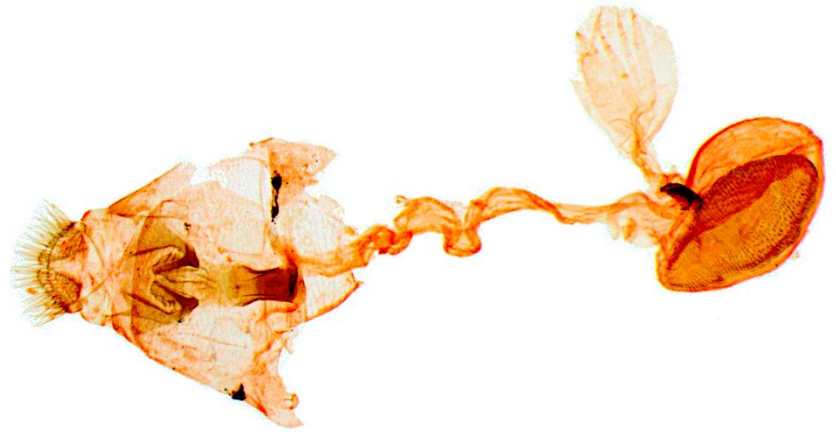

*Daulia nr. afralis*

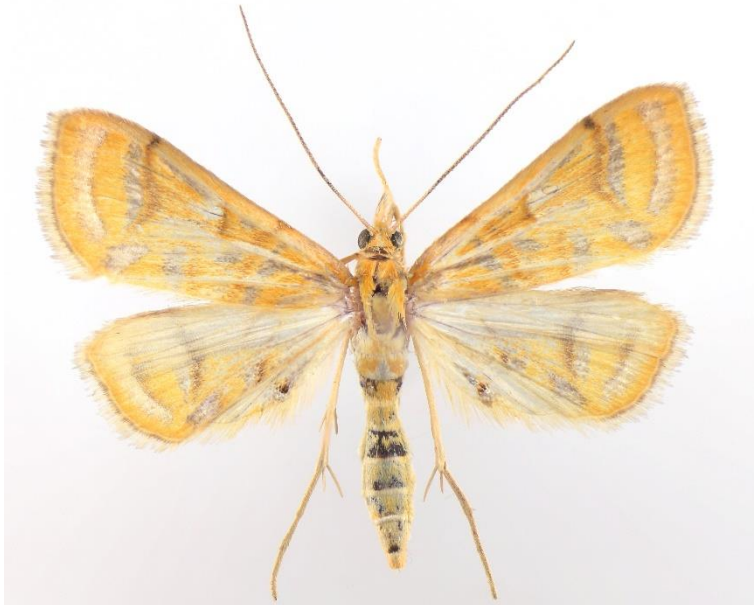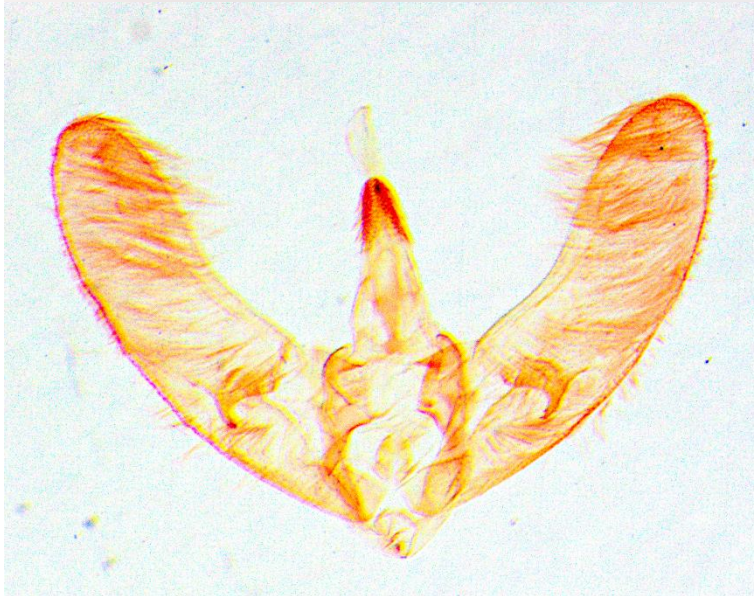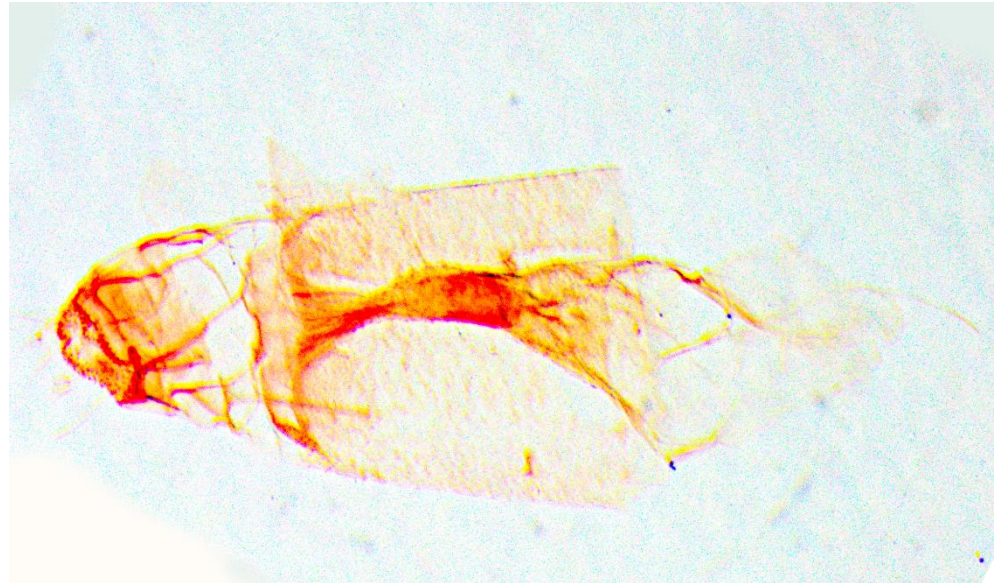



# *Pagyda quinquelineata*

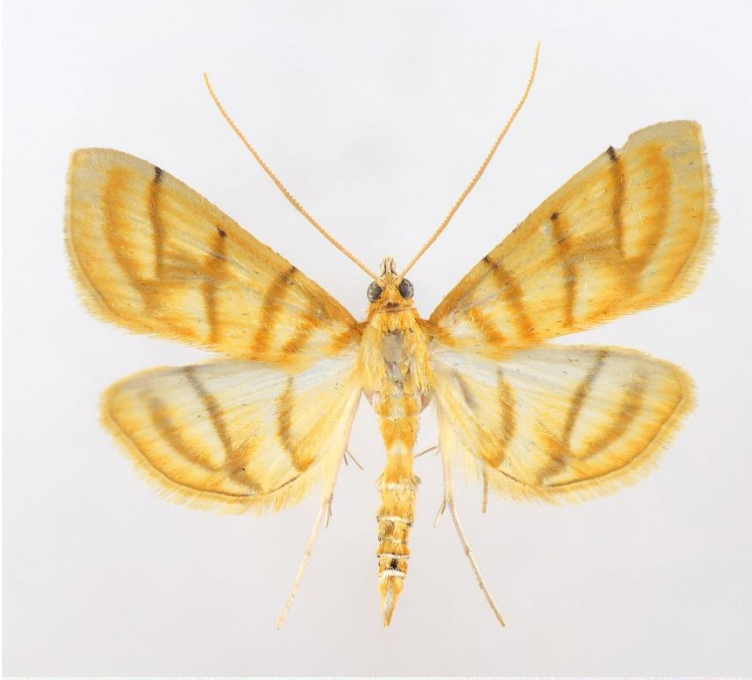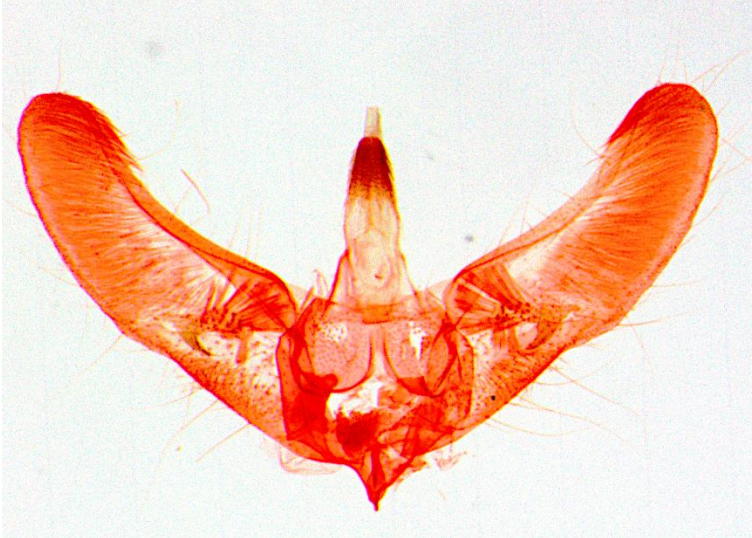

# *Pagyda quadrilineata*

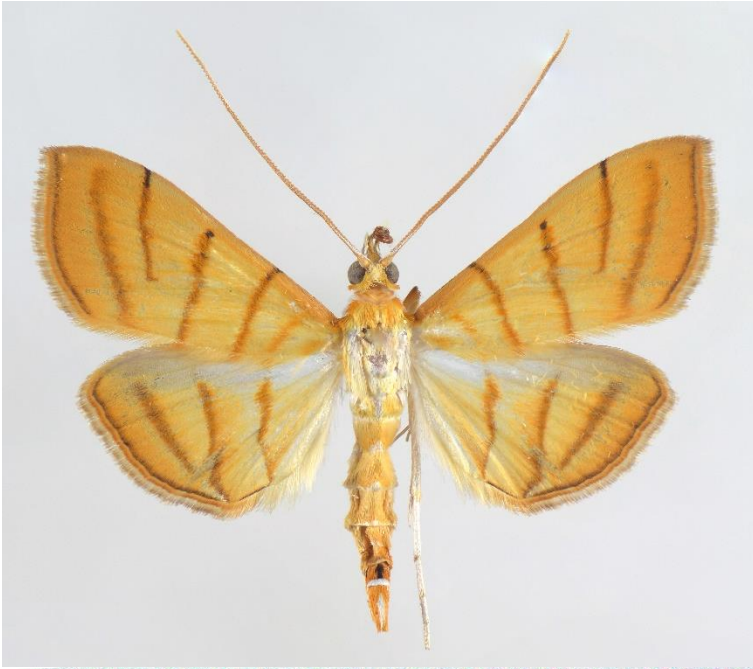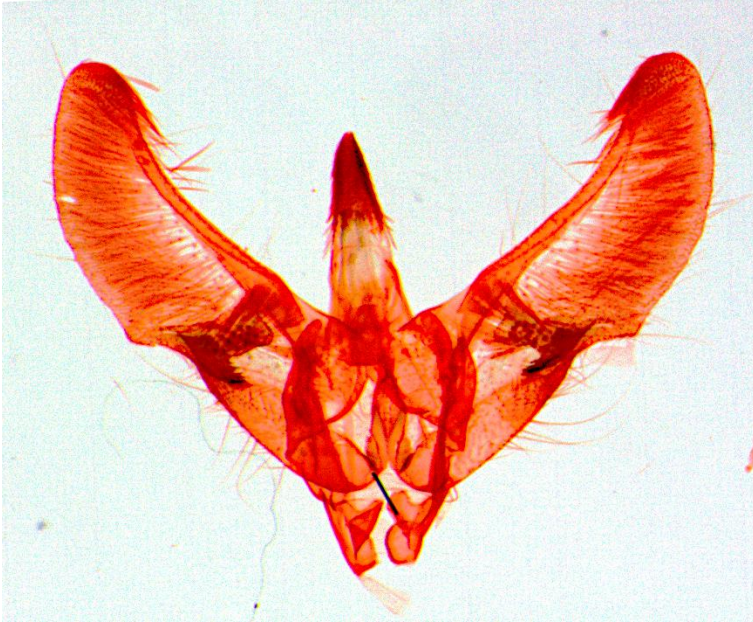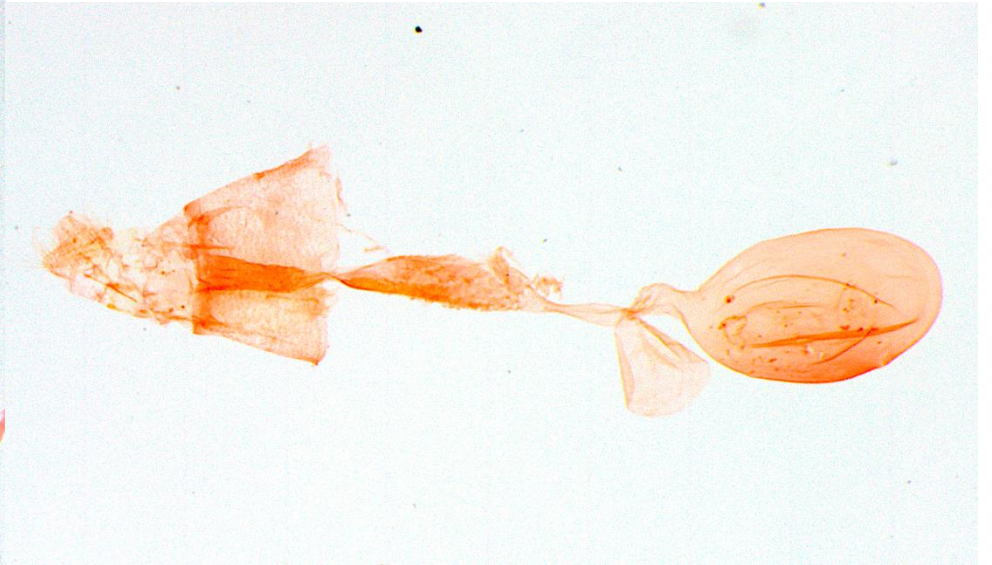



# *Ostrinia furnacalis*

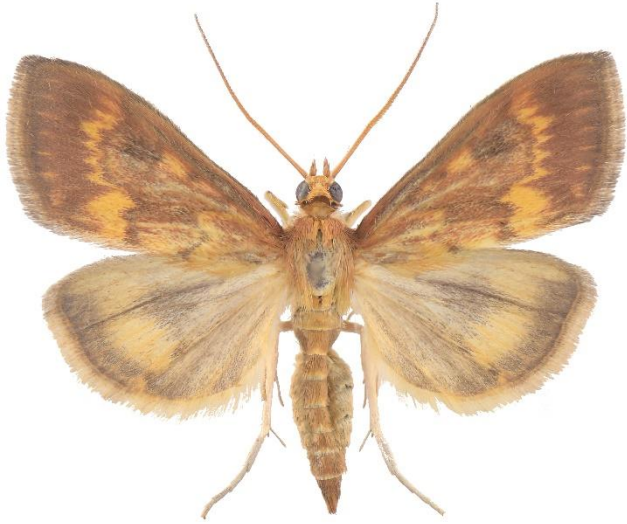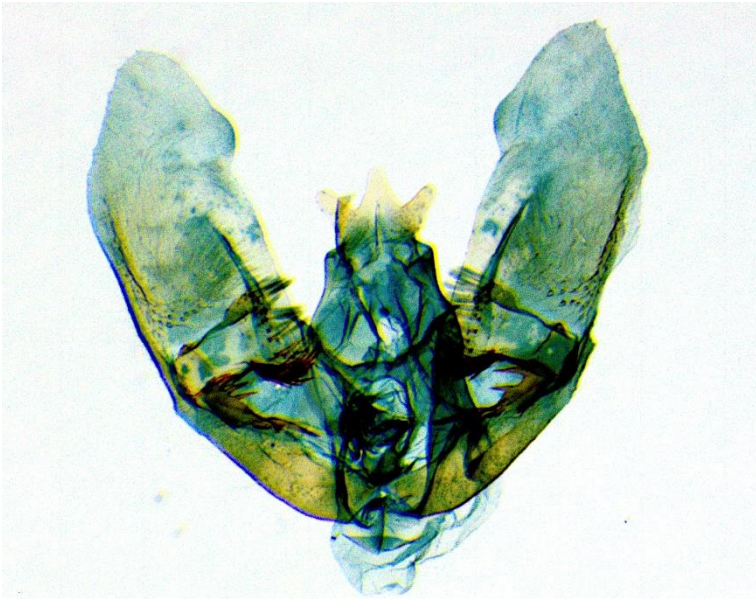

# *Ostrinia scapulalis*

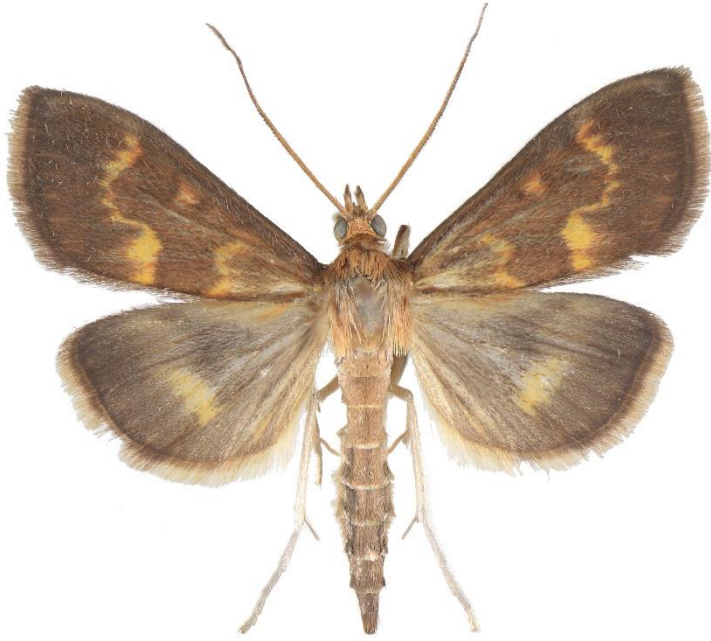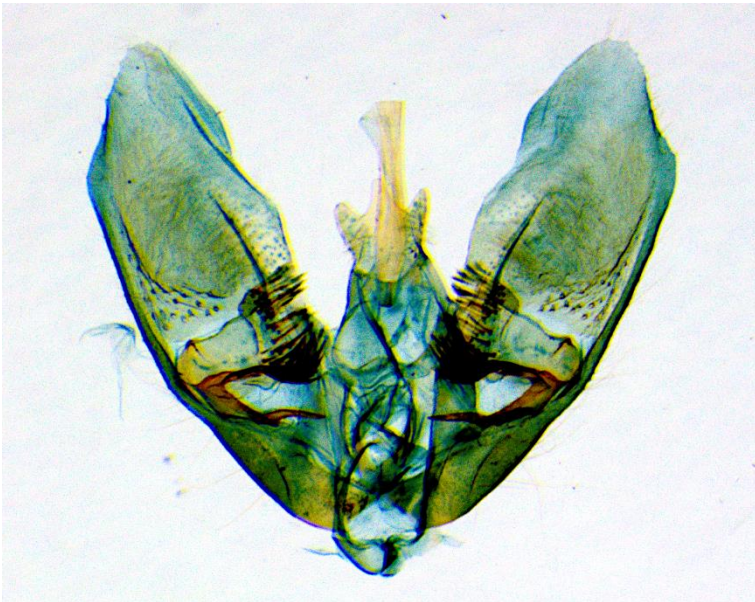



# *Ostrinia orientalis*

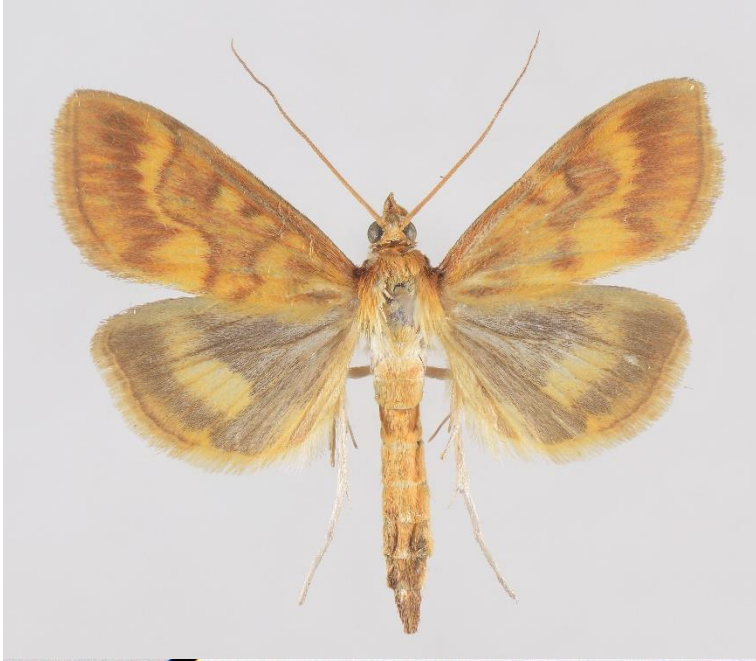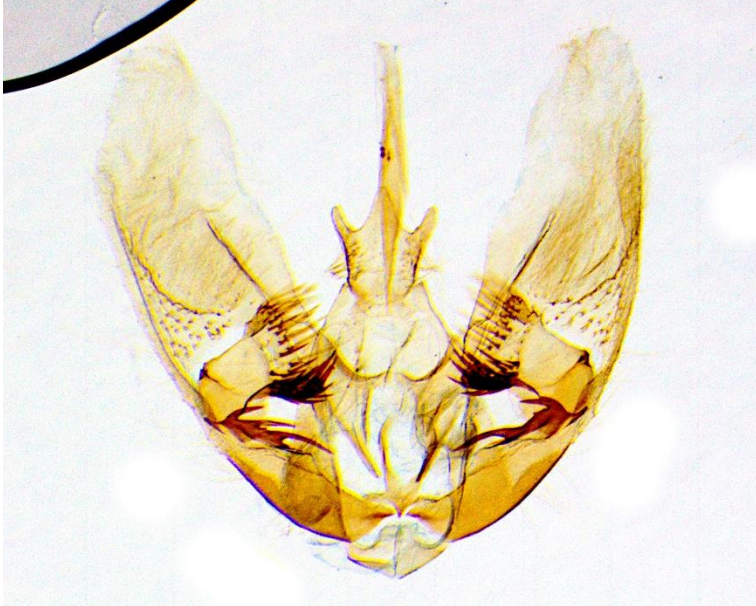

# *Ostrinia zaguliaevi*

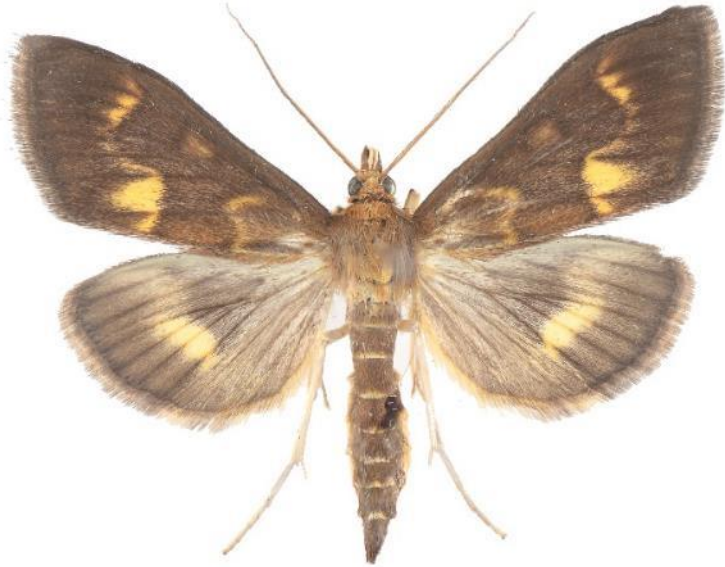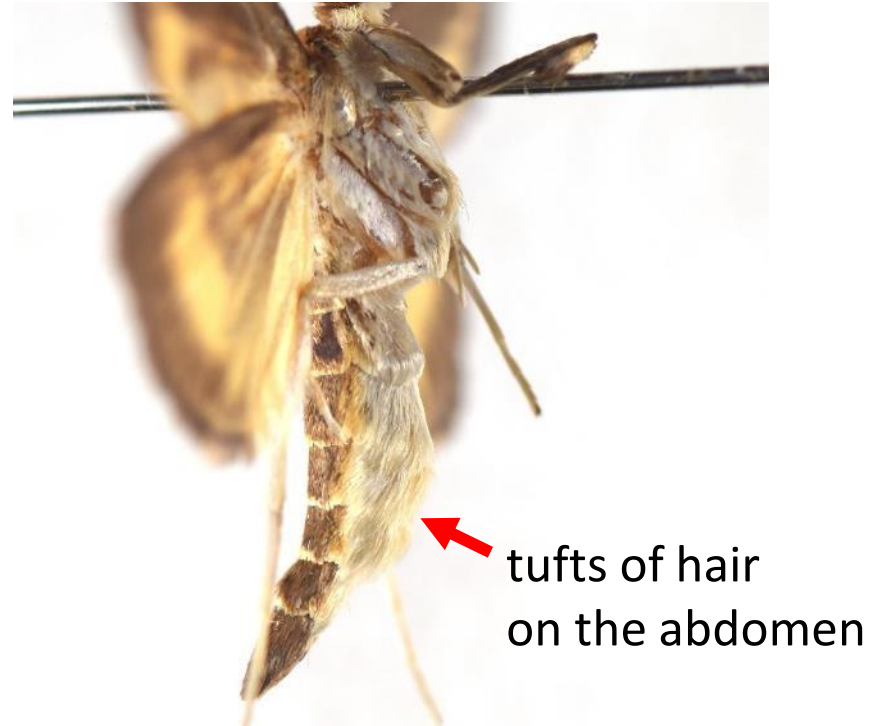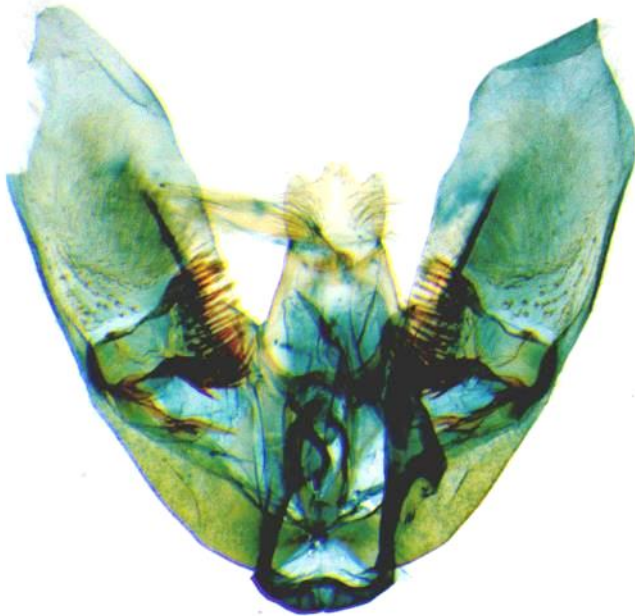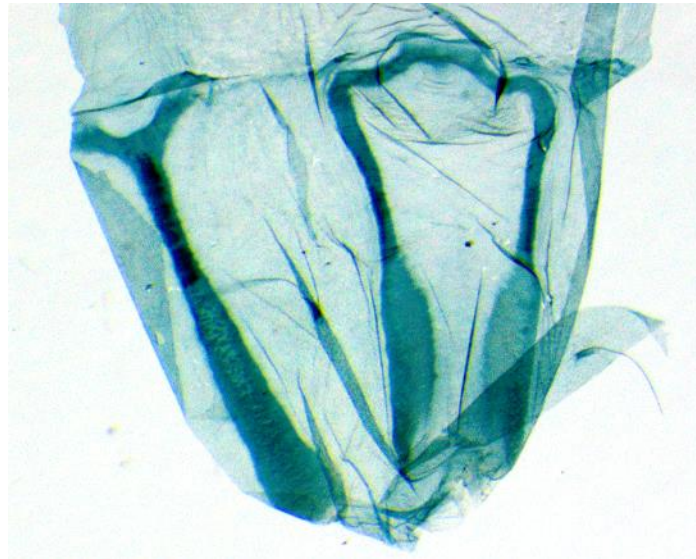



# *Ostrinia nr. zaguliaevi*

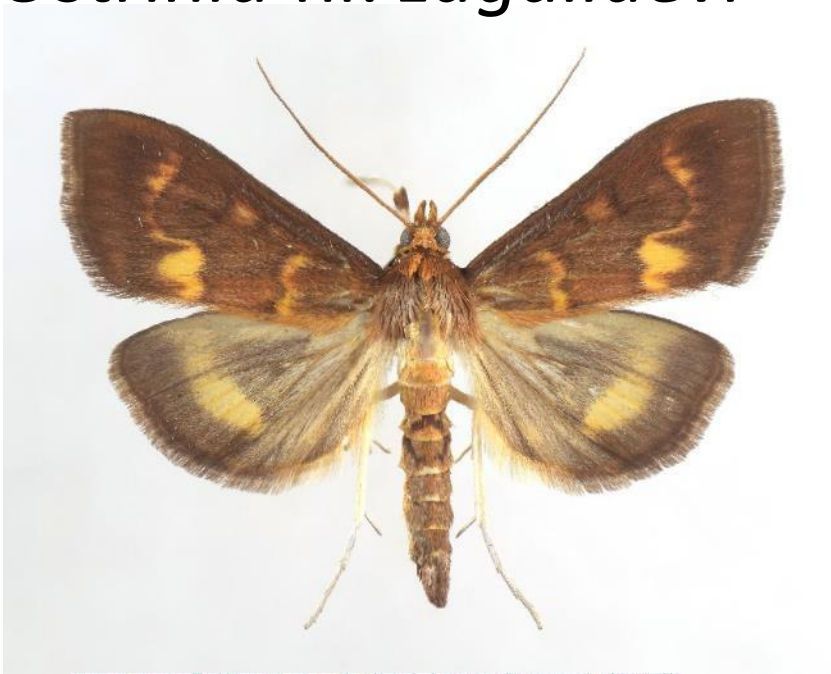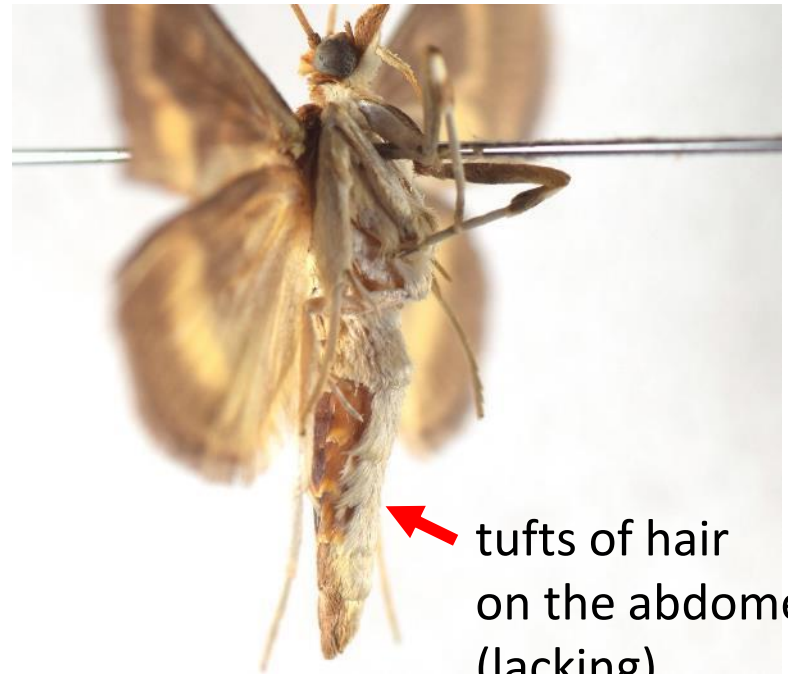

tufts of hair  
on the abdomen  
(lacking)

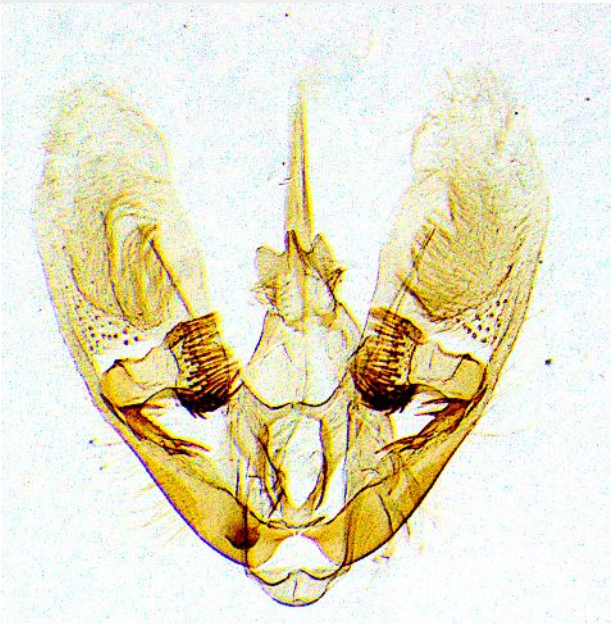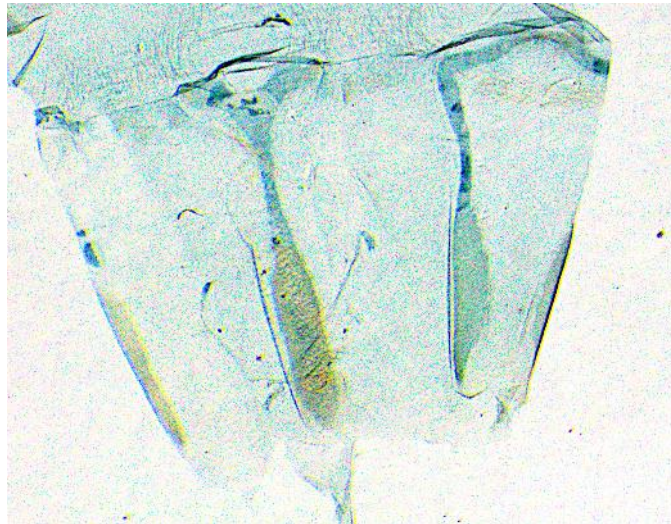

# *Ostrinia zealis*

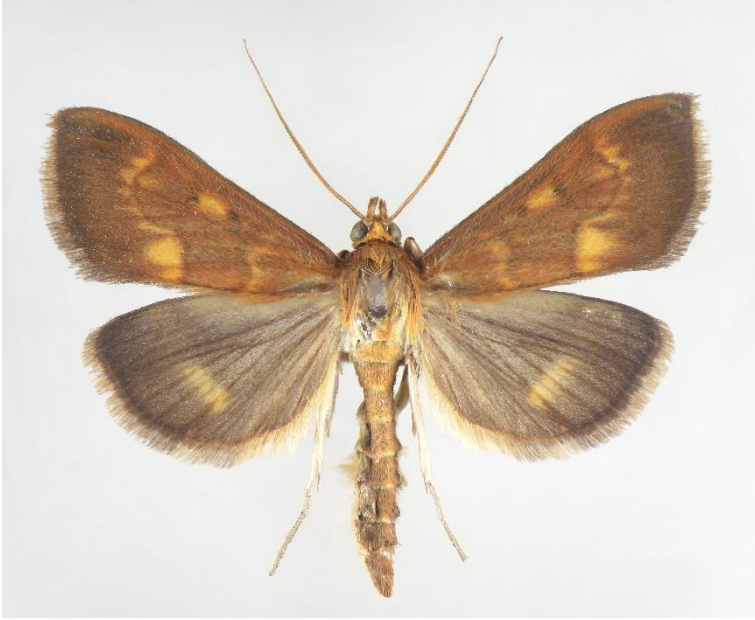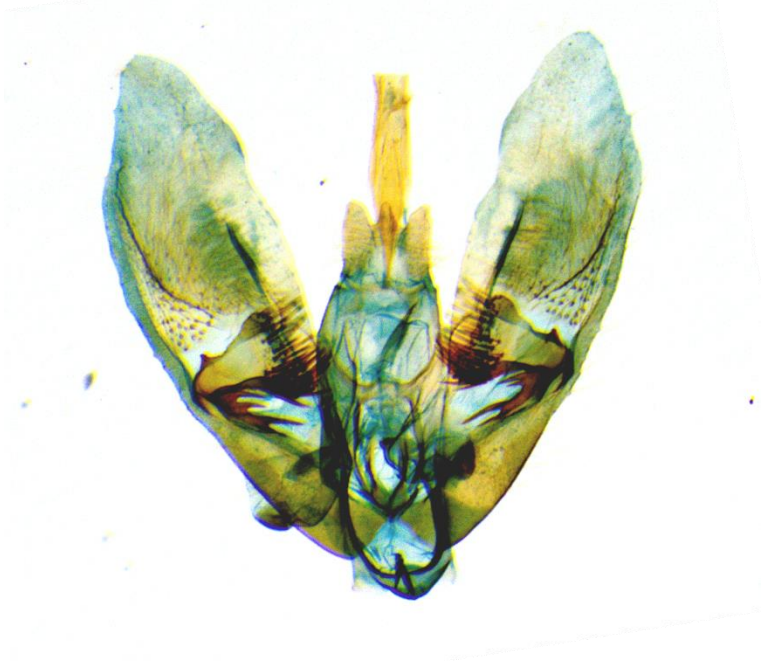



# *Aurorobotys aurorina*

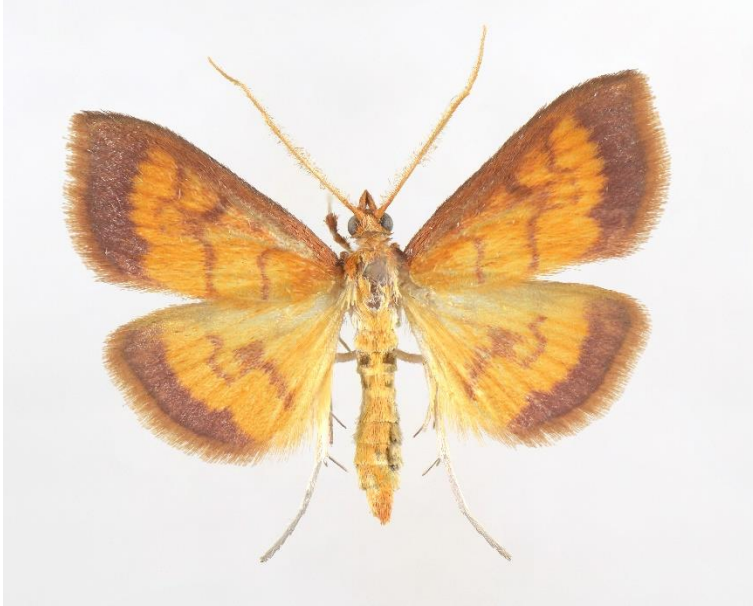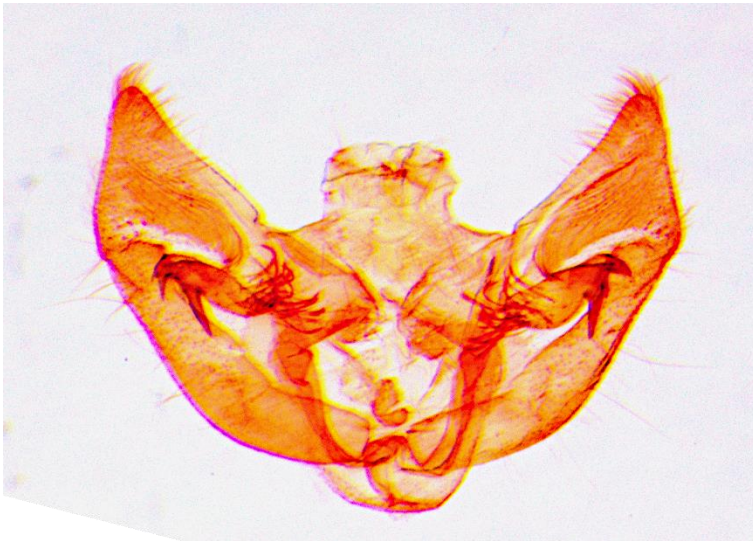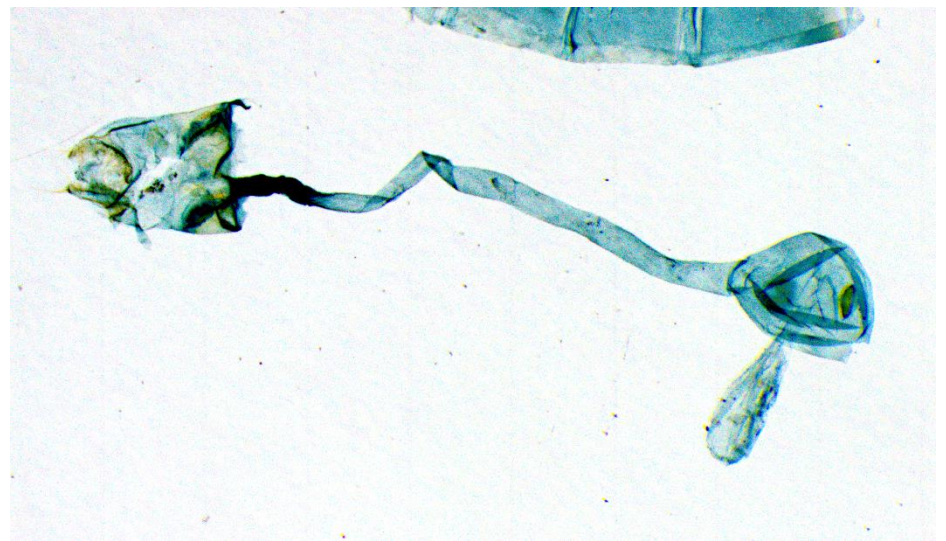

# *Carminibotys carminalis*

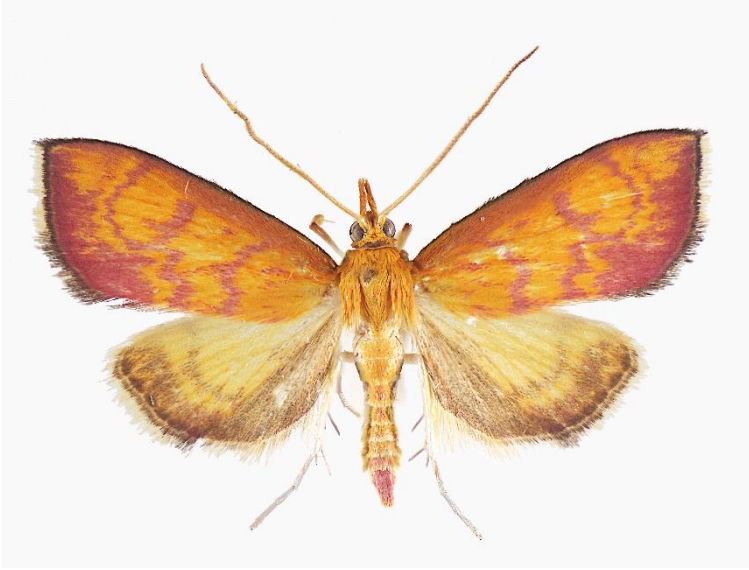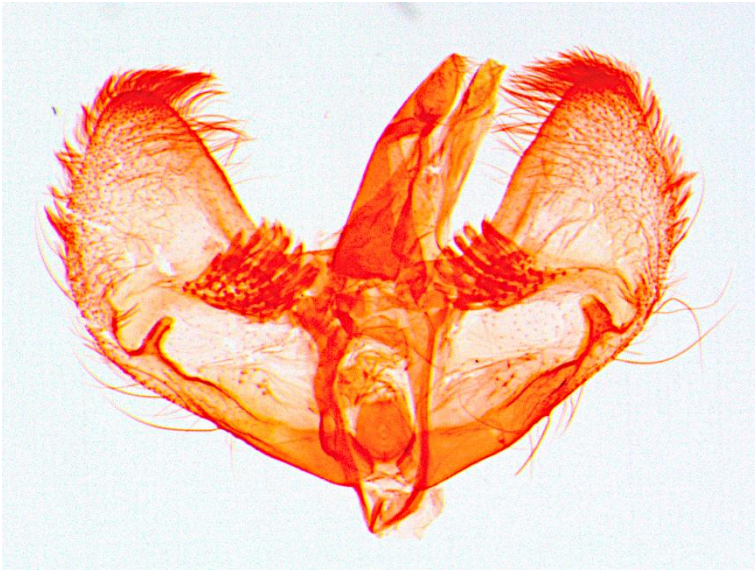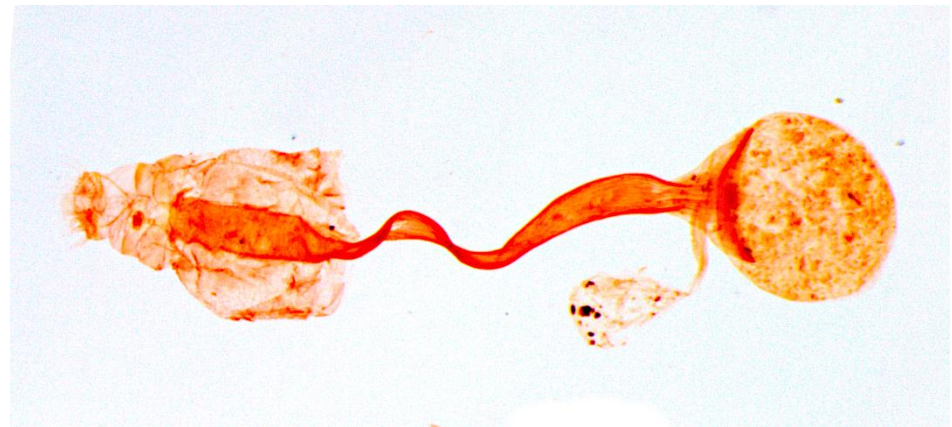



# *Mabra eryxalis*

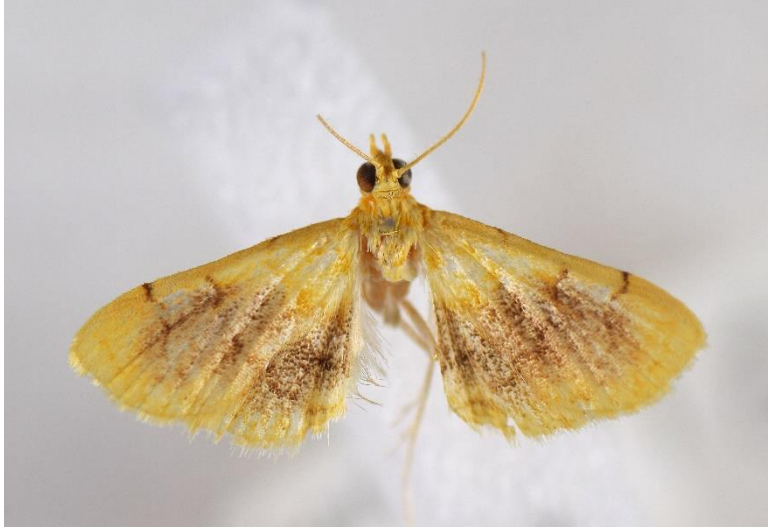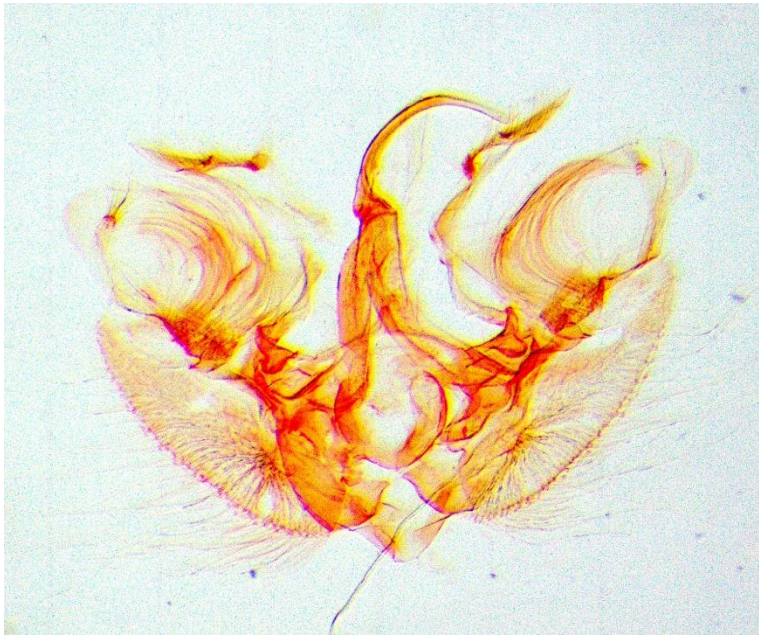

# *Hyalobathra undulinea*

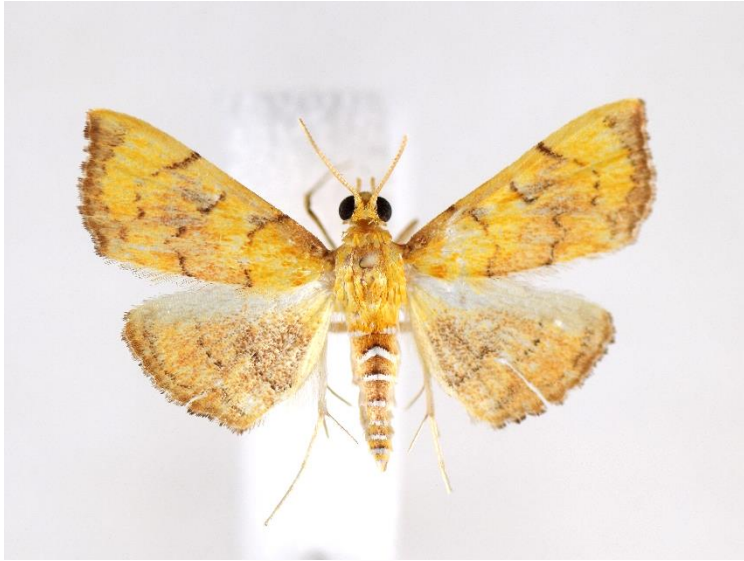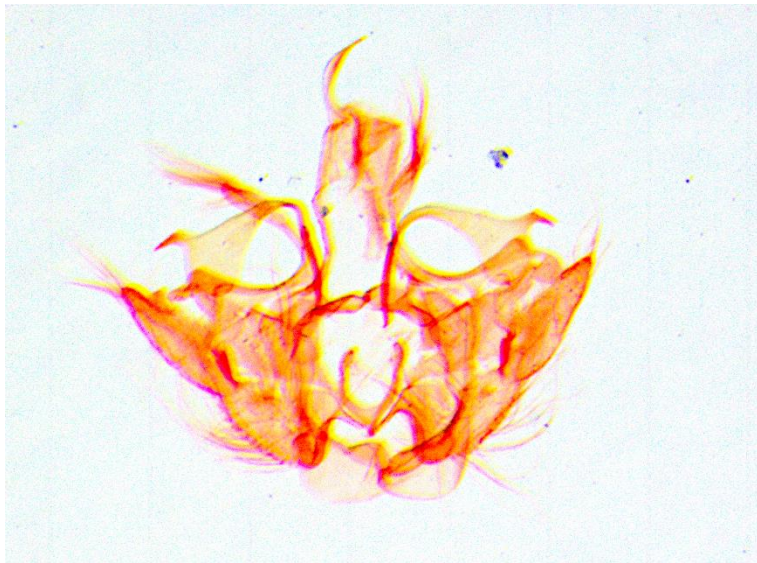



# *Tetridia caletoralis*

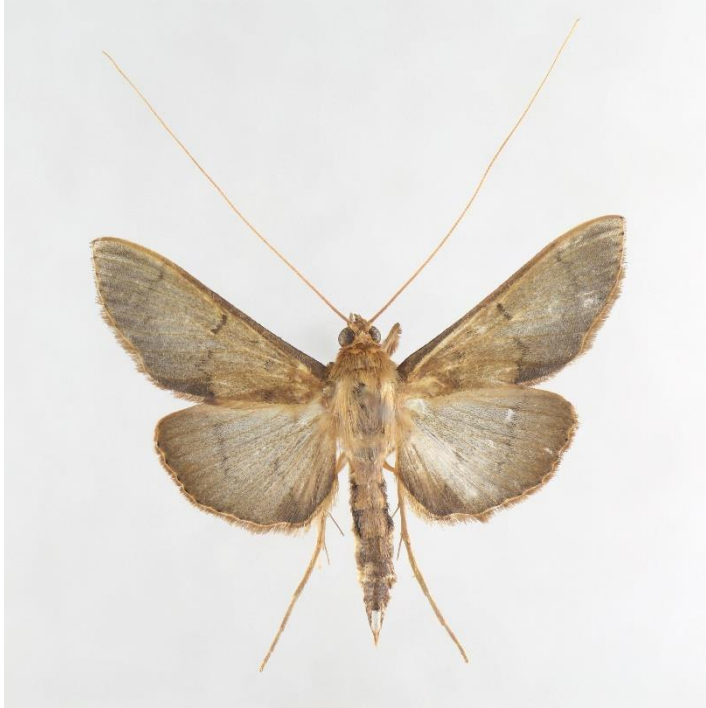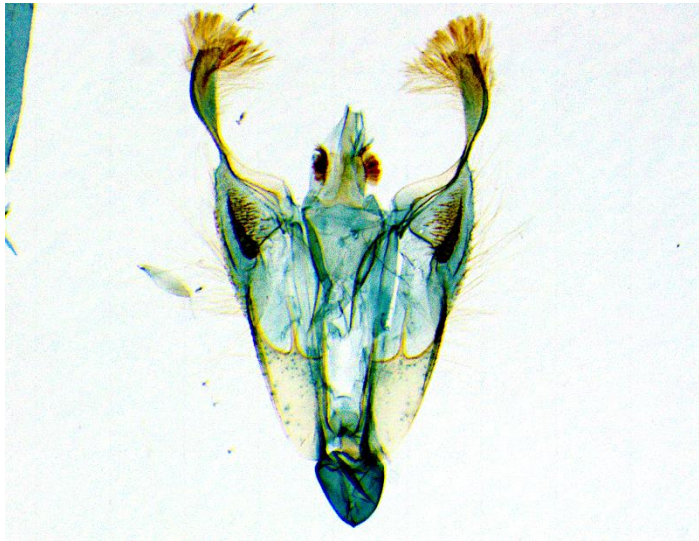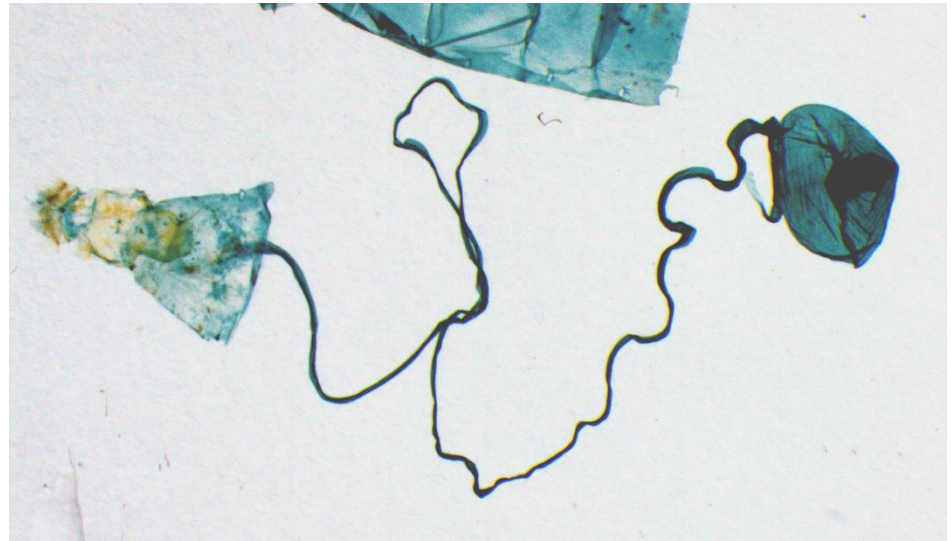

# *Udea testacea*

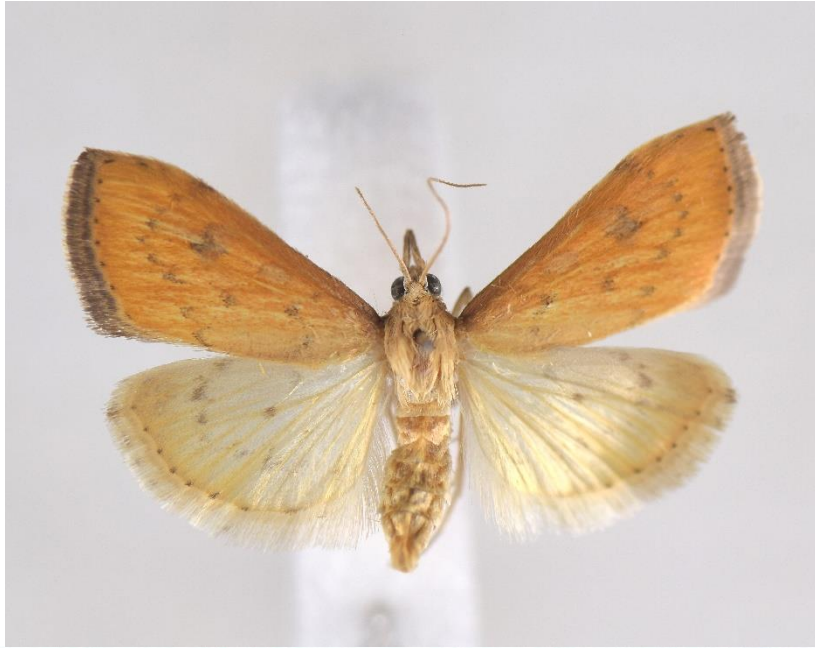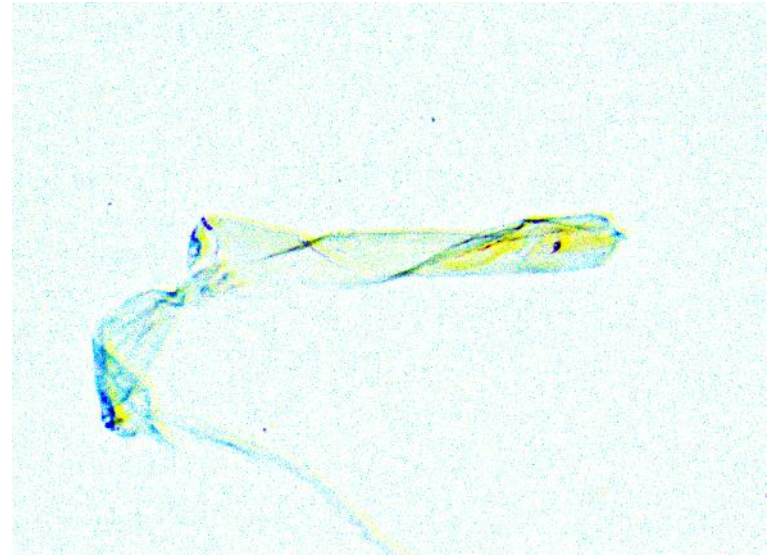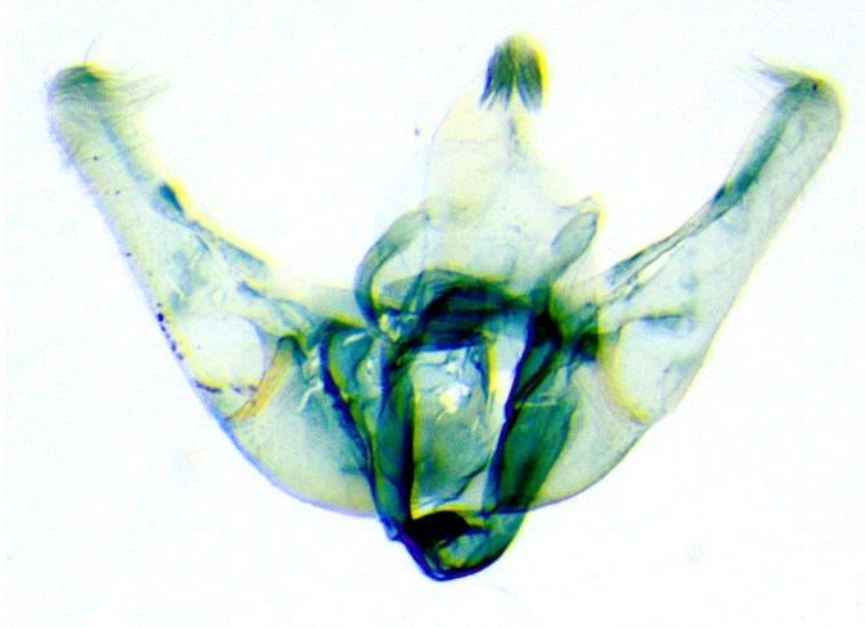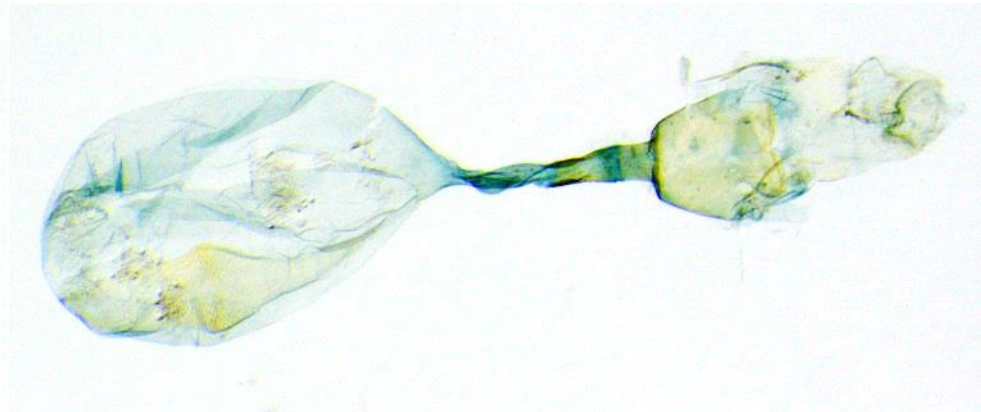



# *Udea nebulatalis*

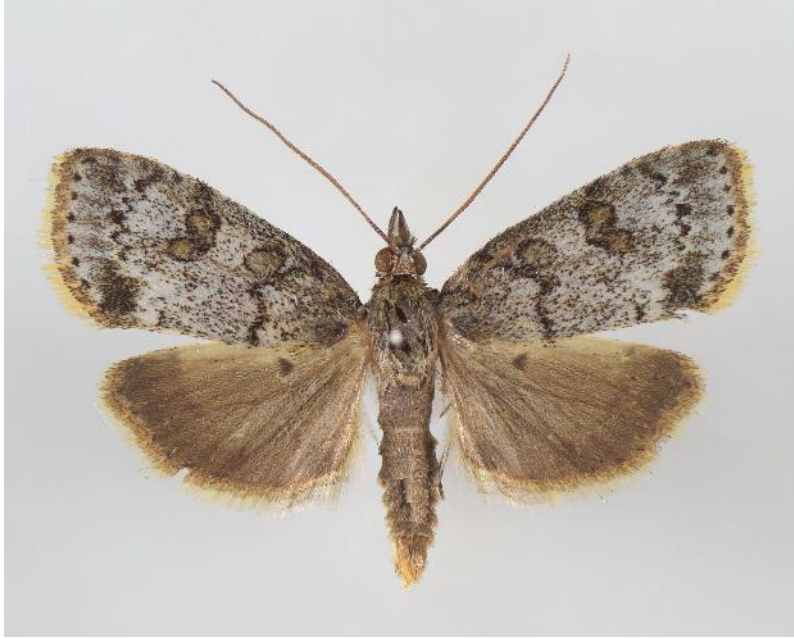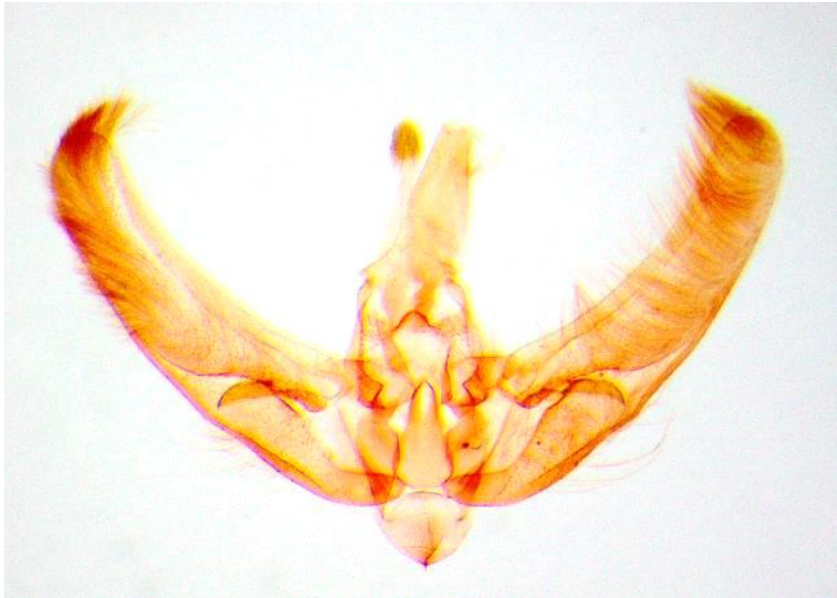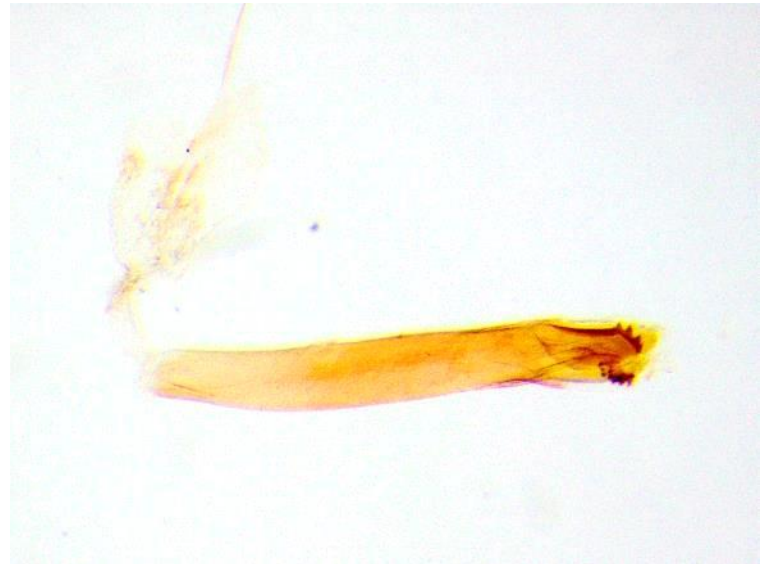

# *Togabotys fuscolineatalis*

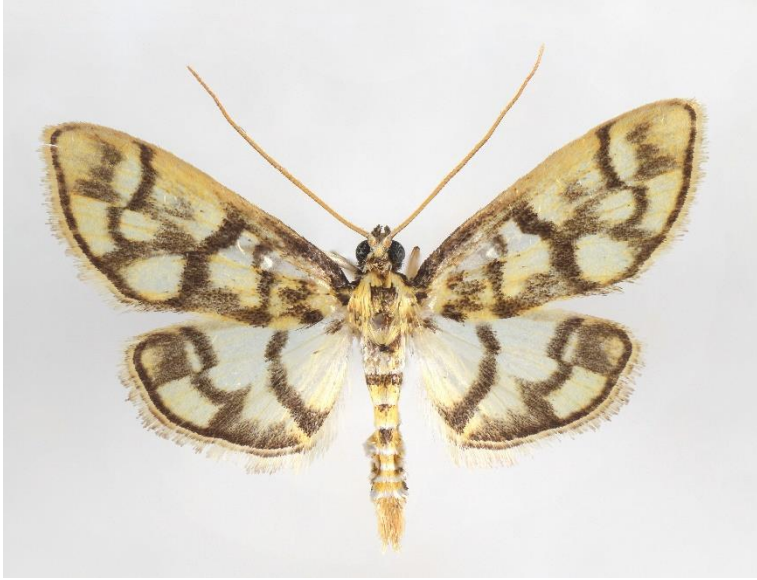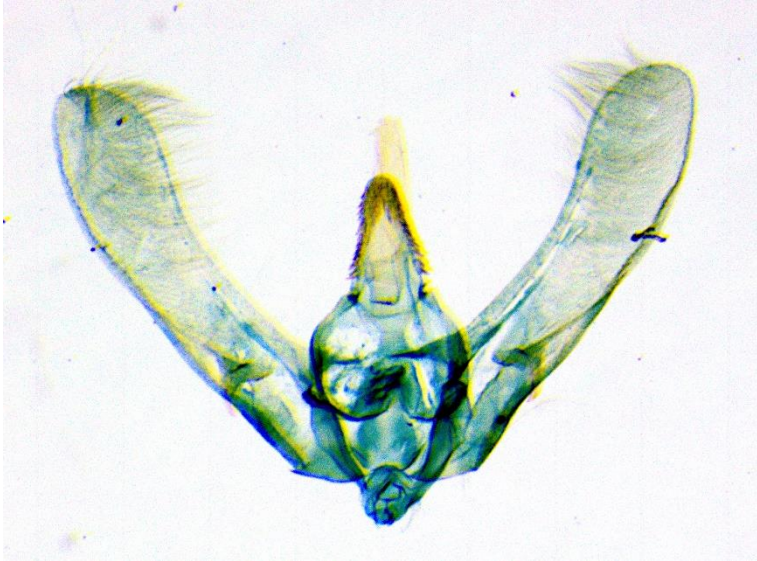



# *Cotachena nr. alysoni*

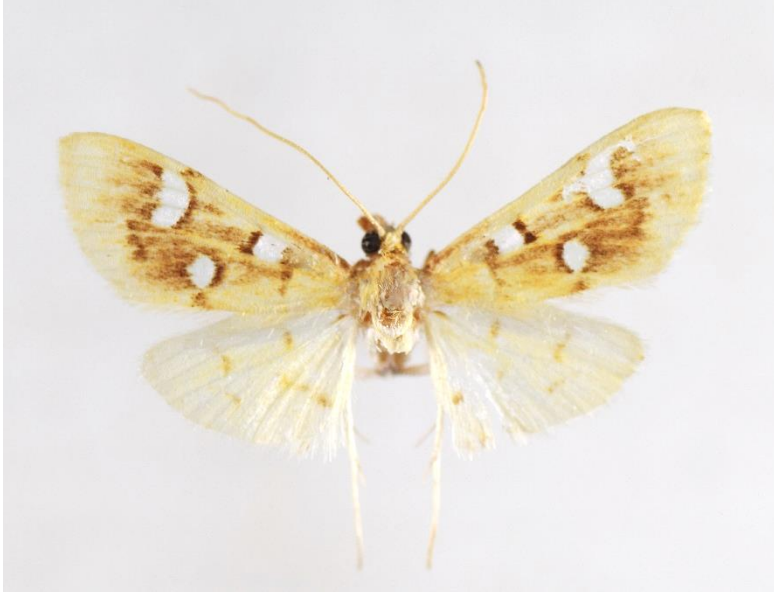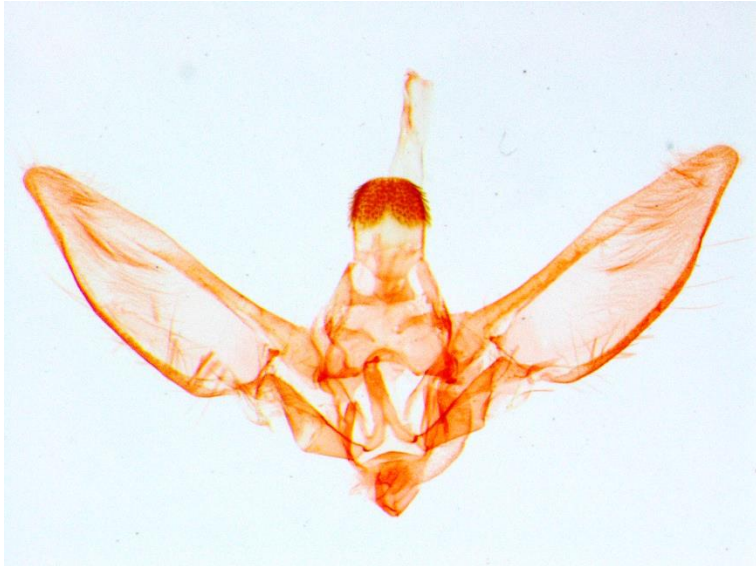

# *Patania expictalis*

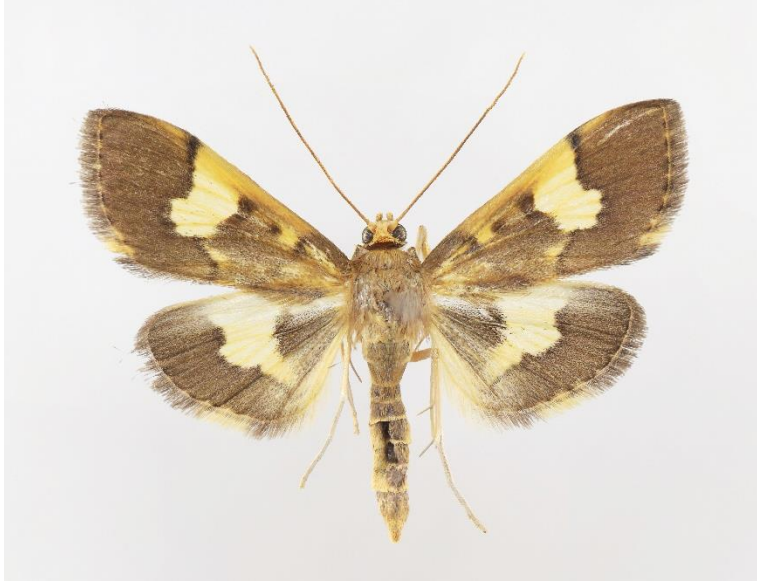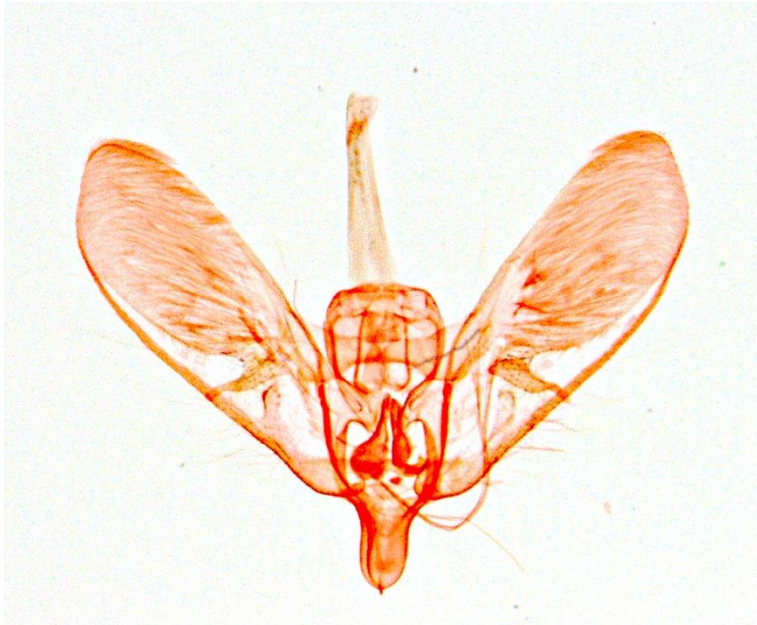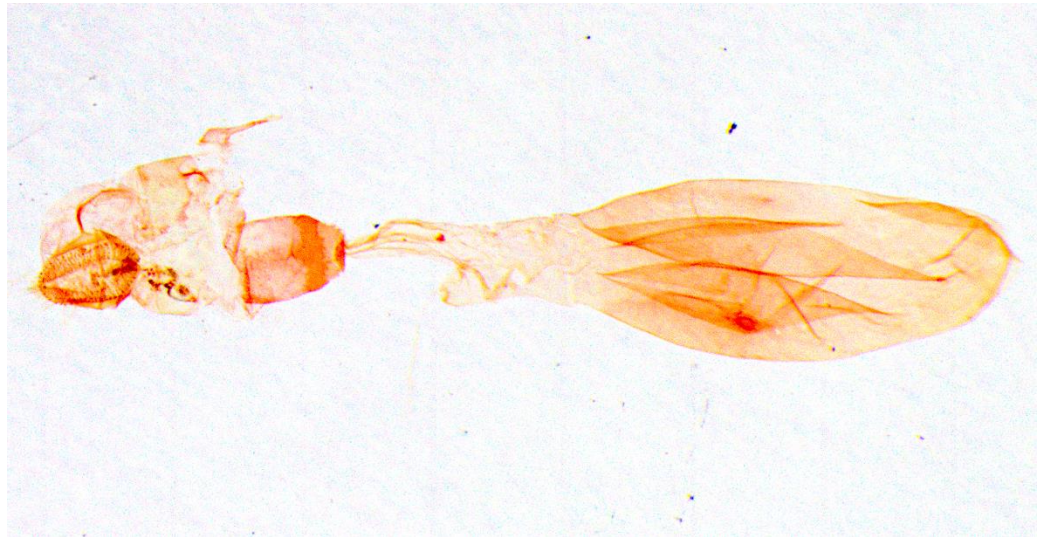



# *Rehimena surusalis*

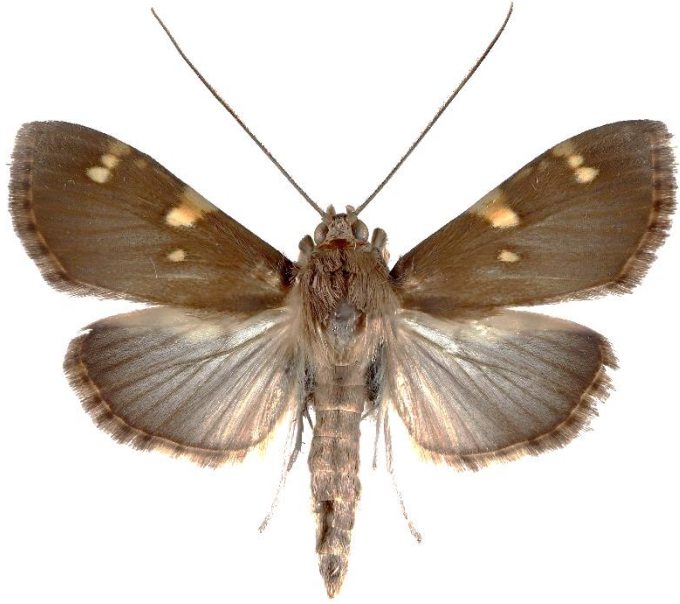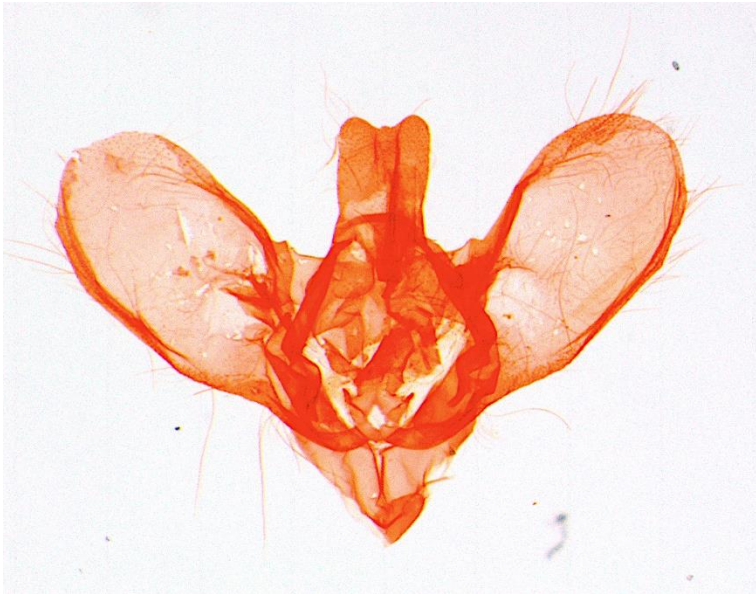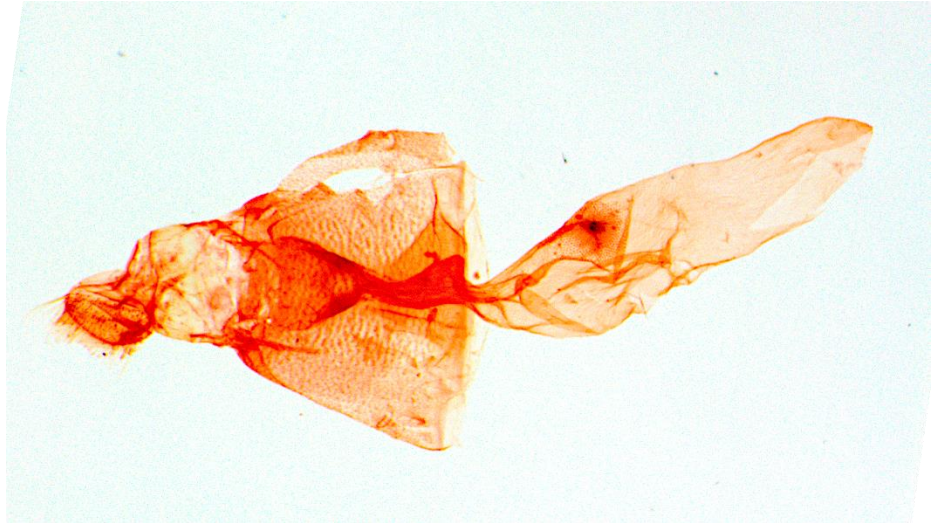

# *Patania characteristica*

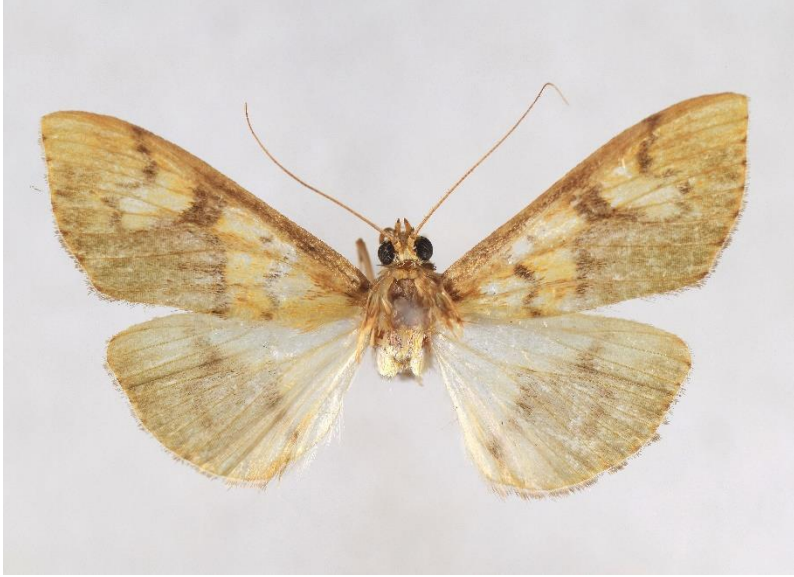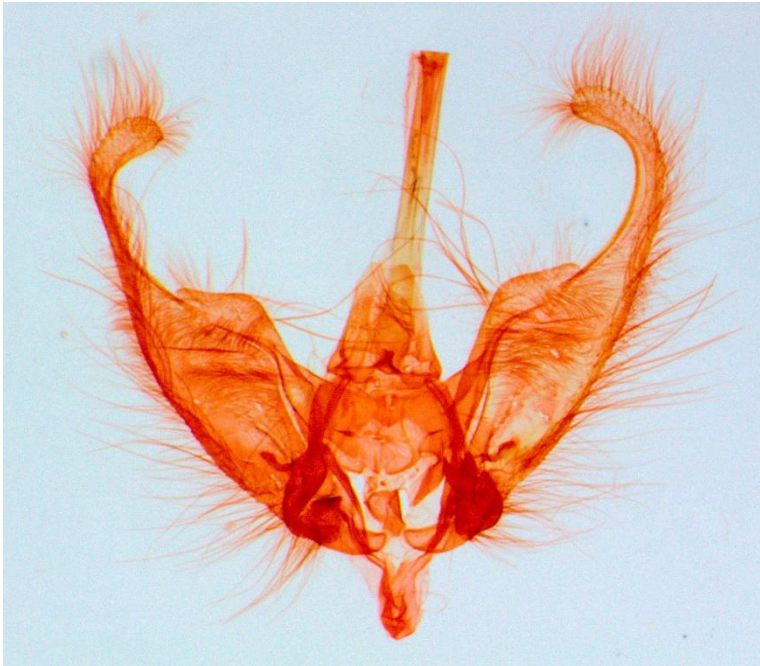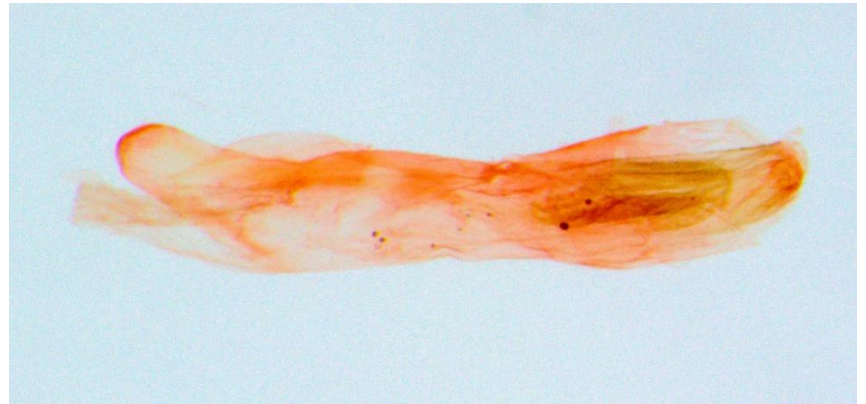



# *Patania harutai*

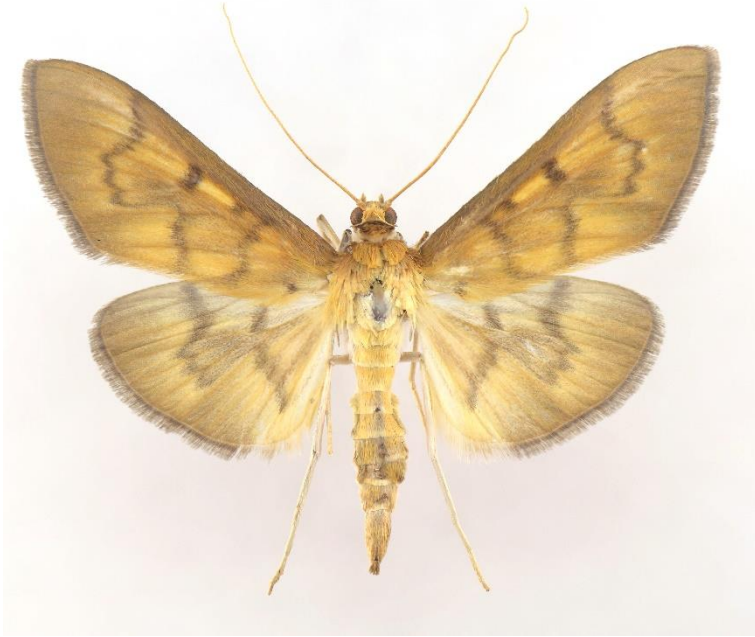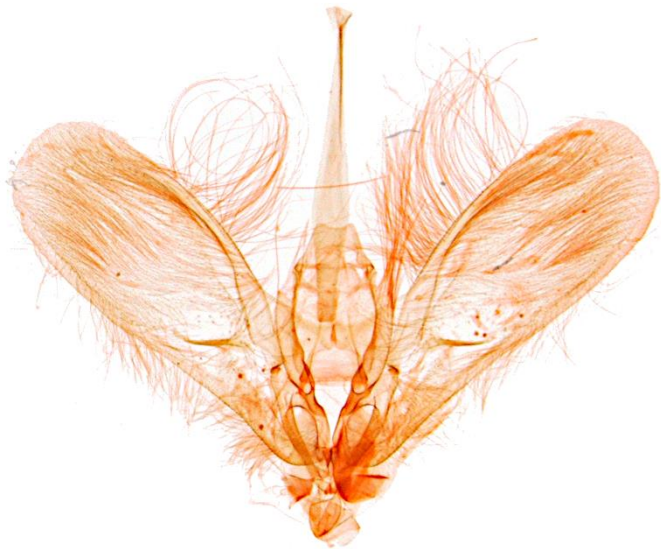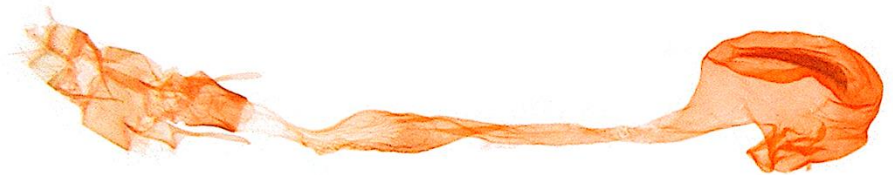

# *Patania balteata*

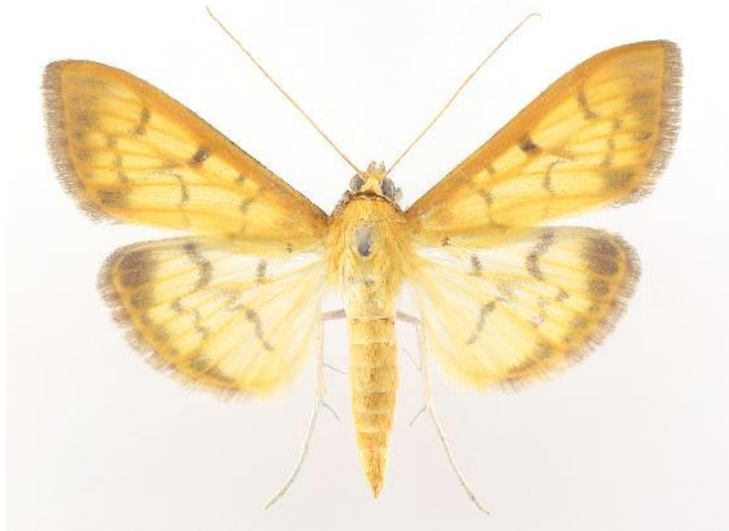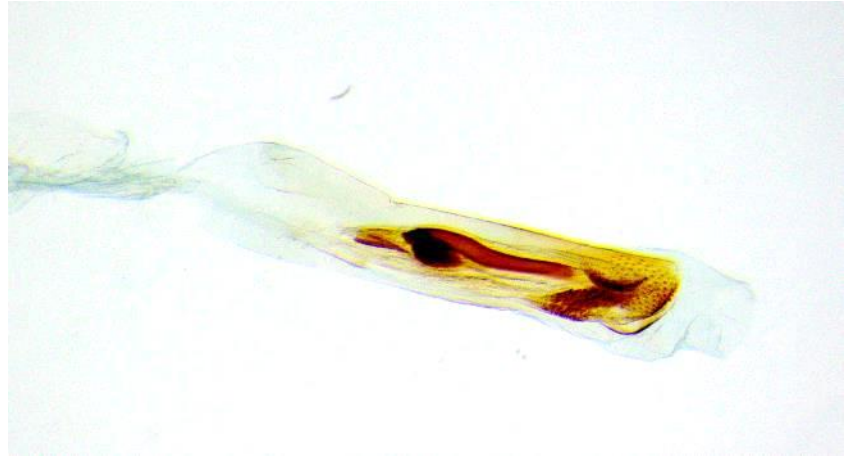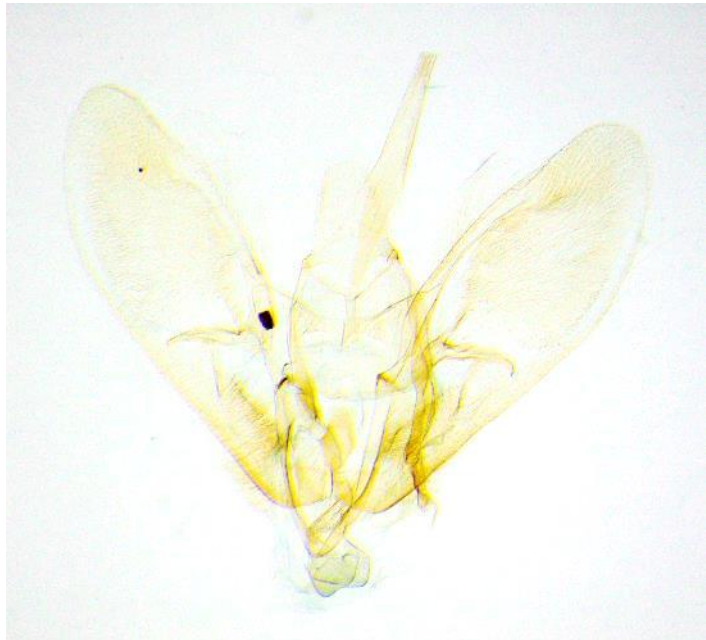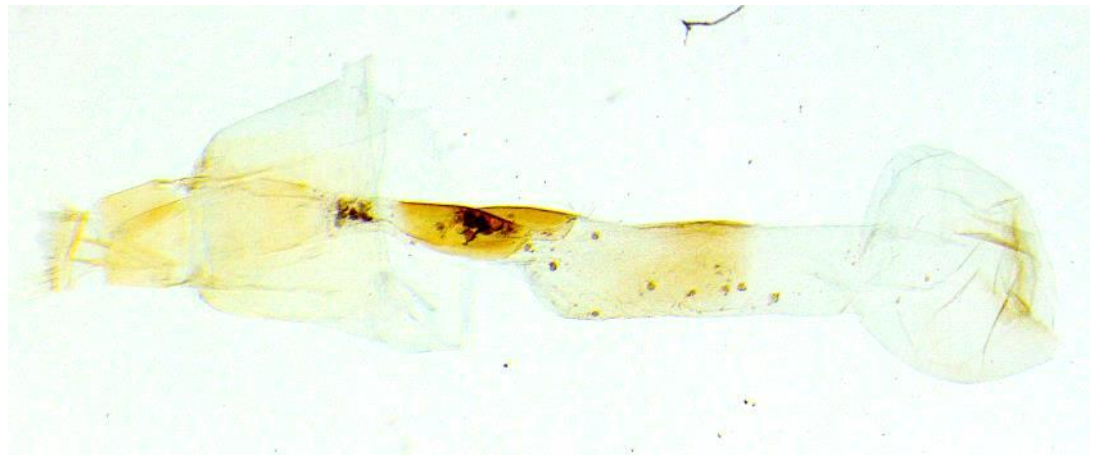



# *Nosophora semitritalis*

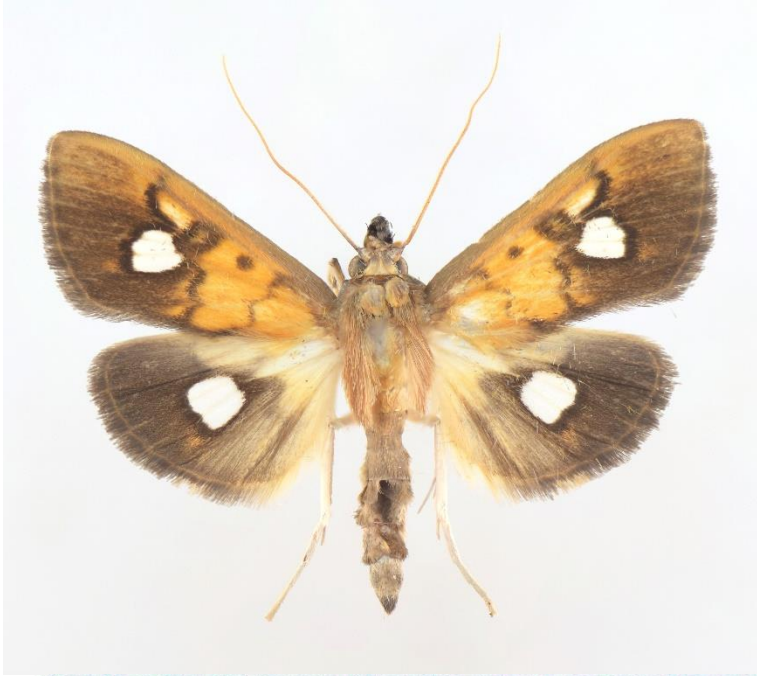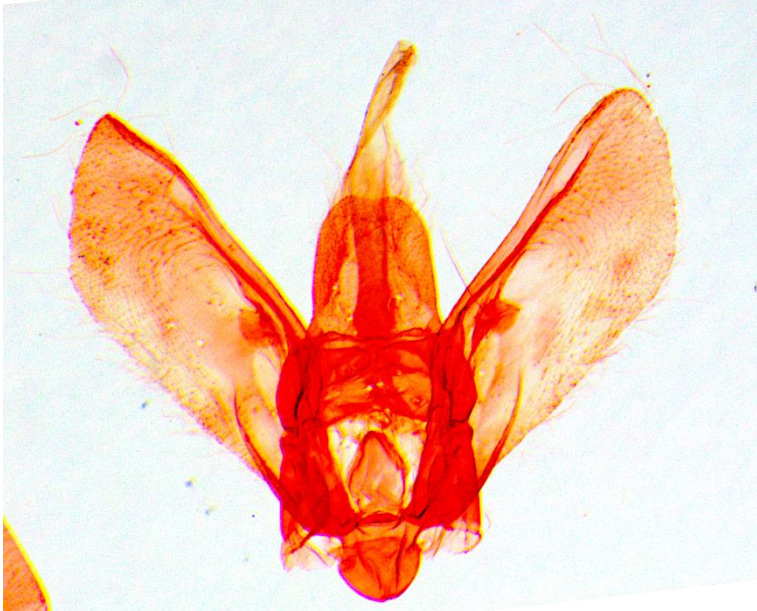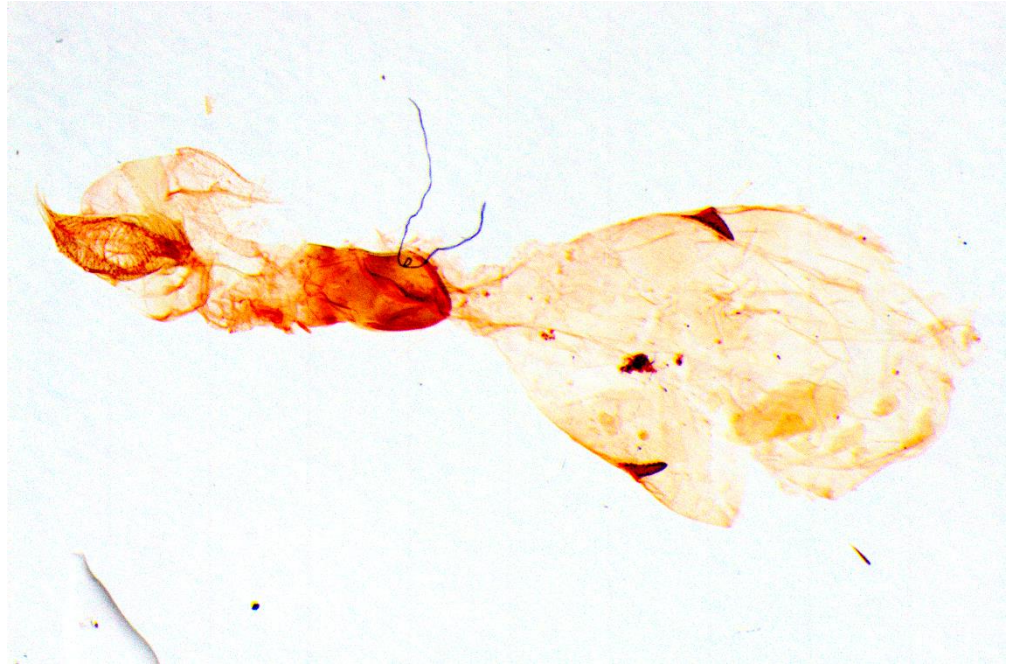

# *Patania plagiatalis*

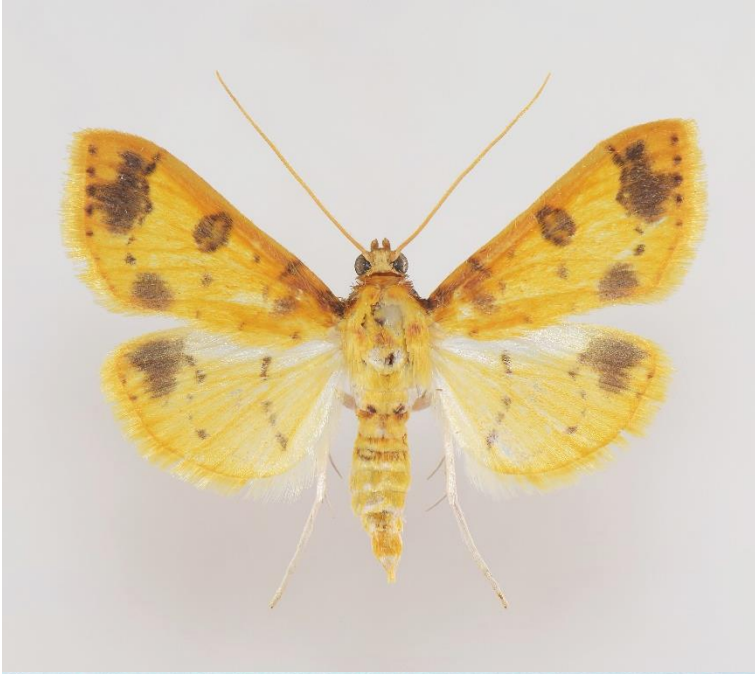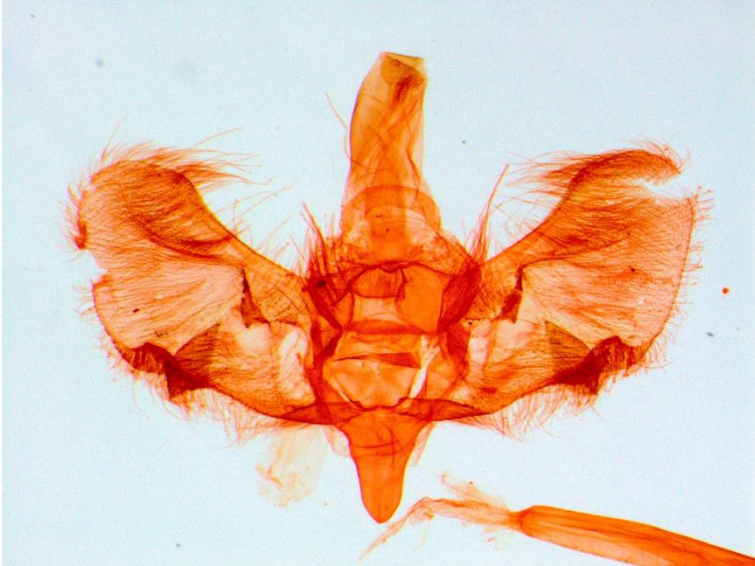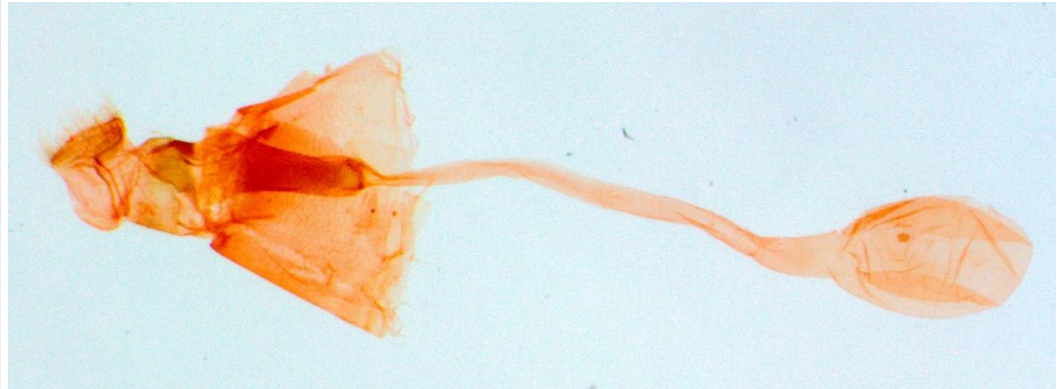



*Patania ultimalis*

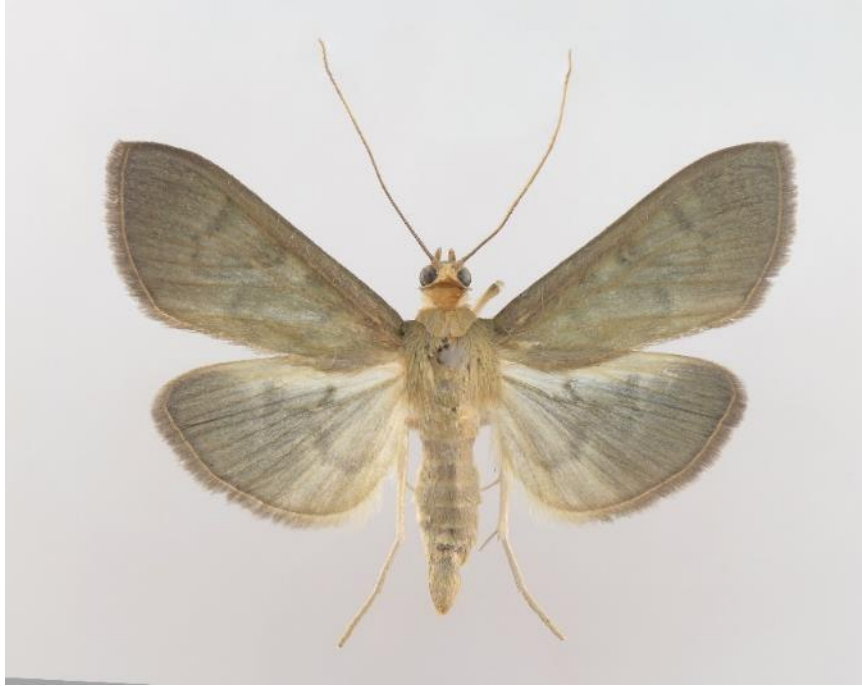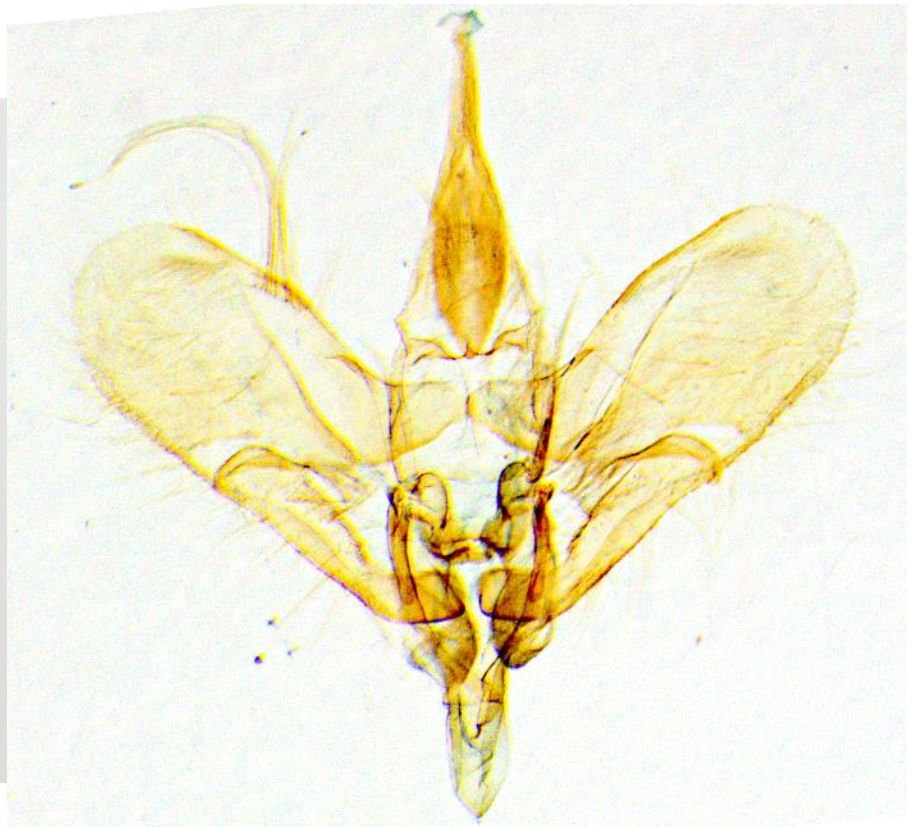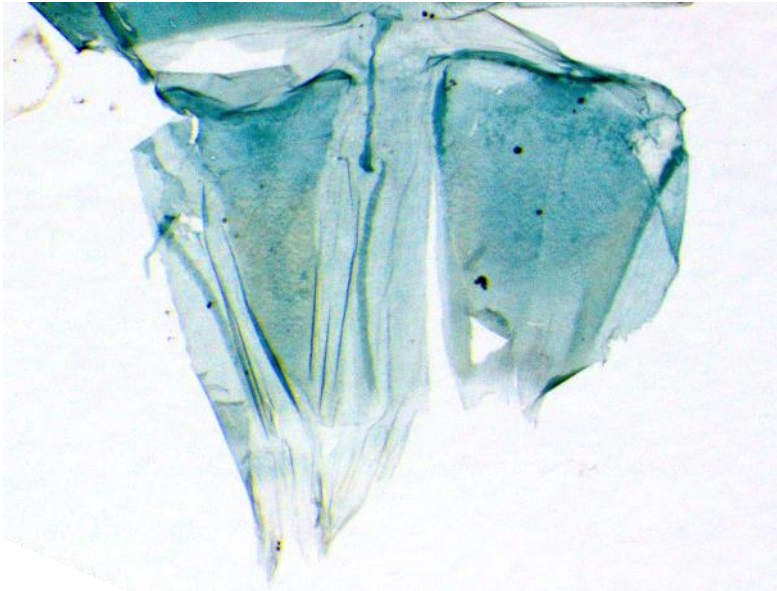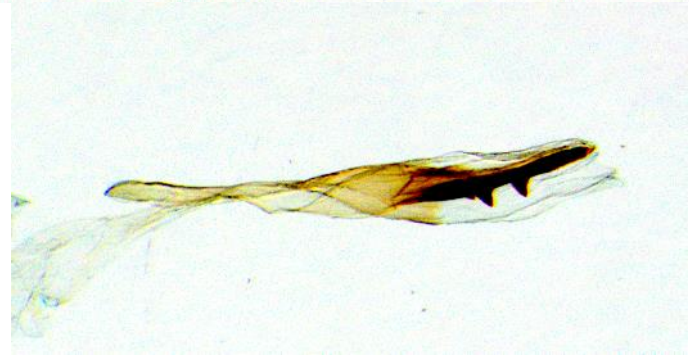

# *Tyspanodes striata*

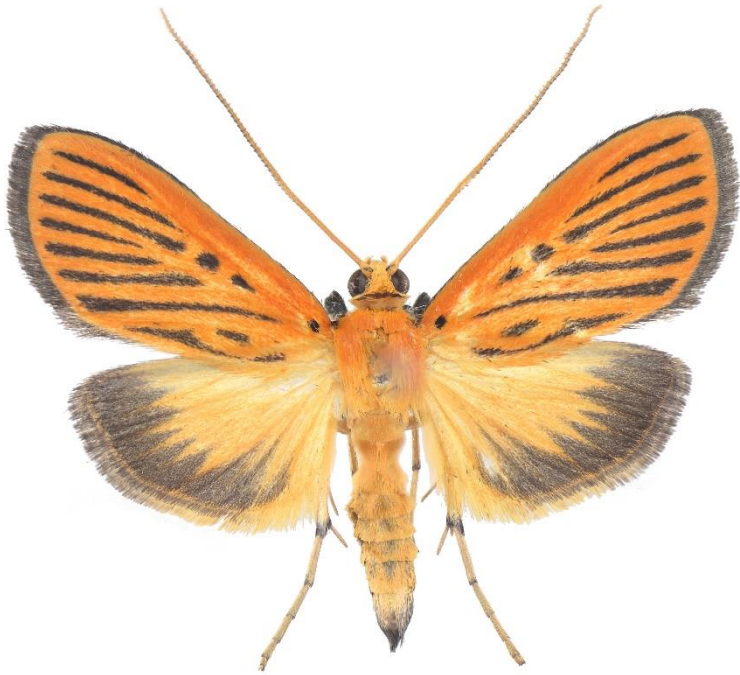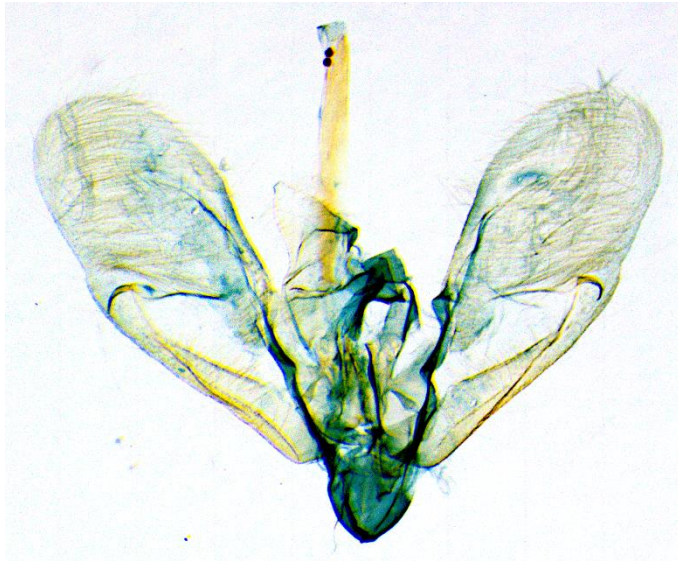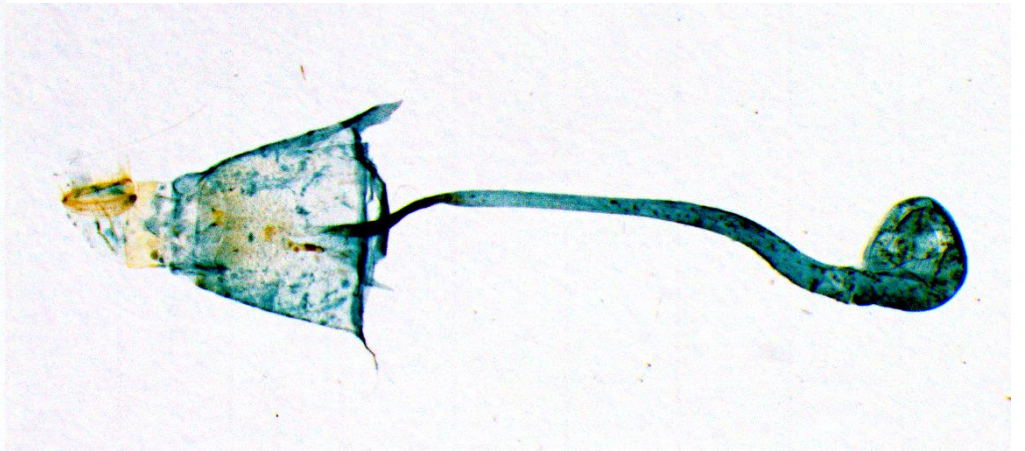



# *Nebrina procopia*

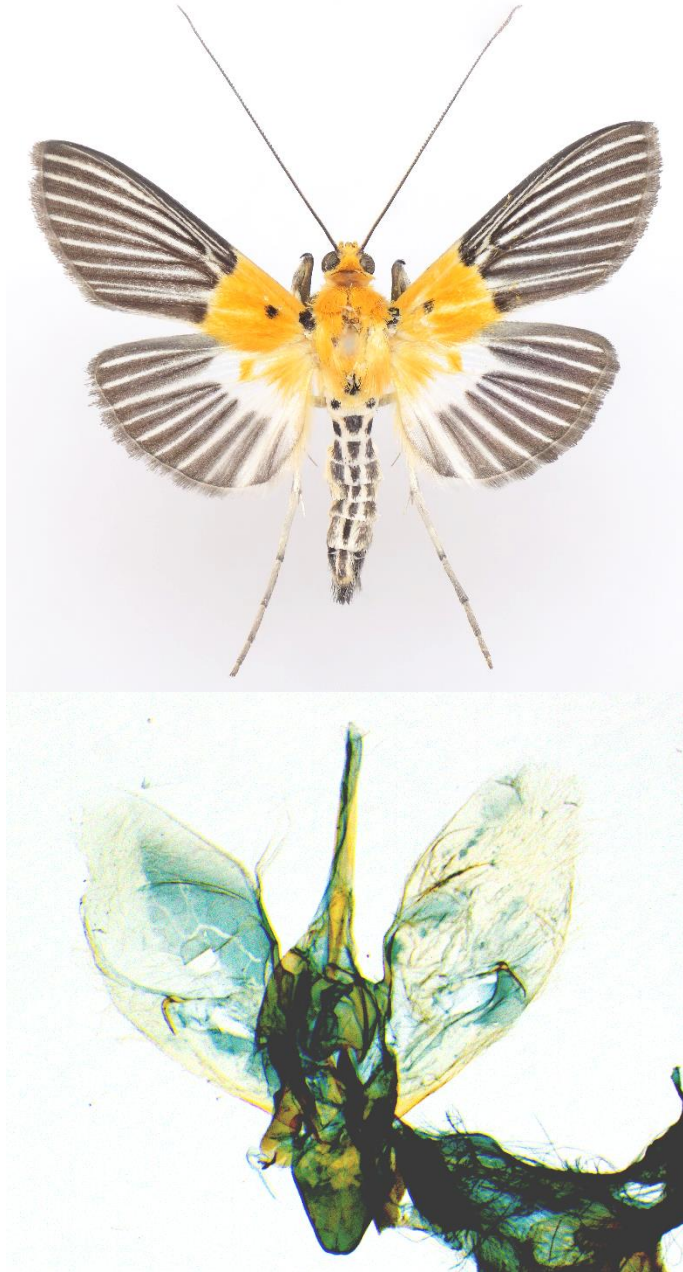

# *Caldubotys caludusalis*

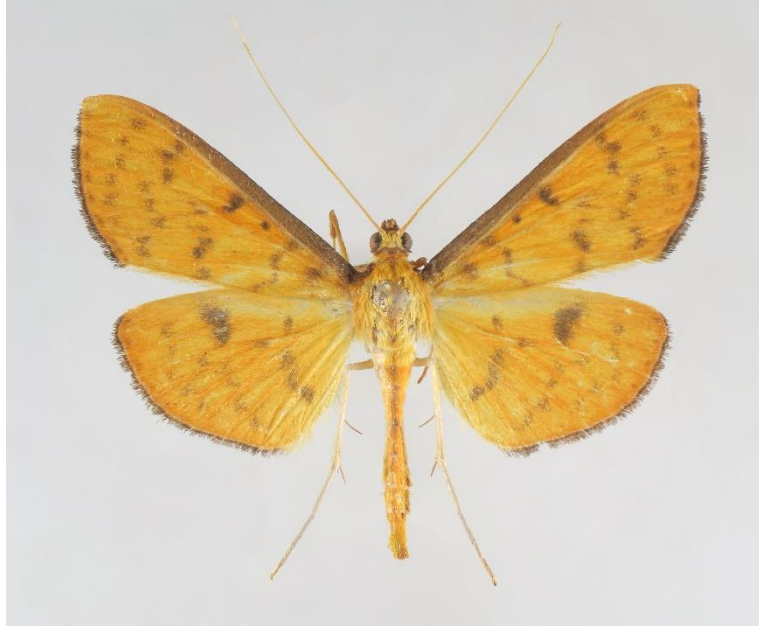



# *Glyphodes nr. actorionalis*

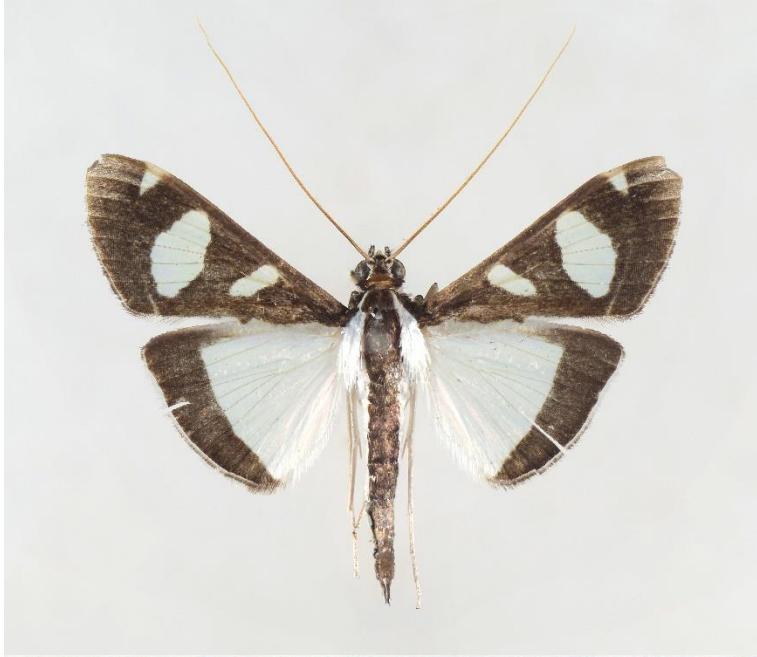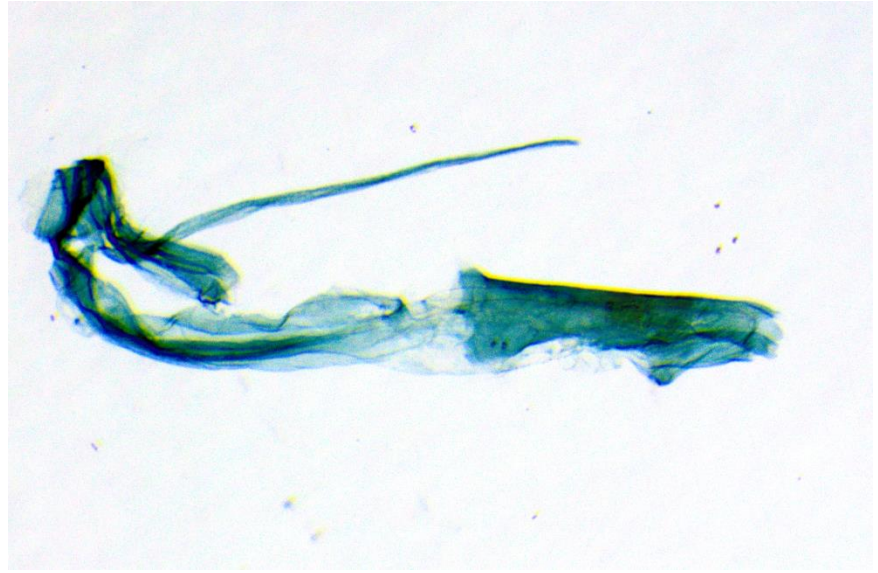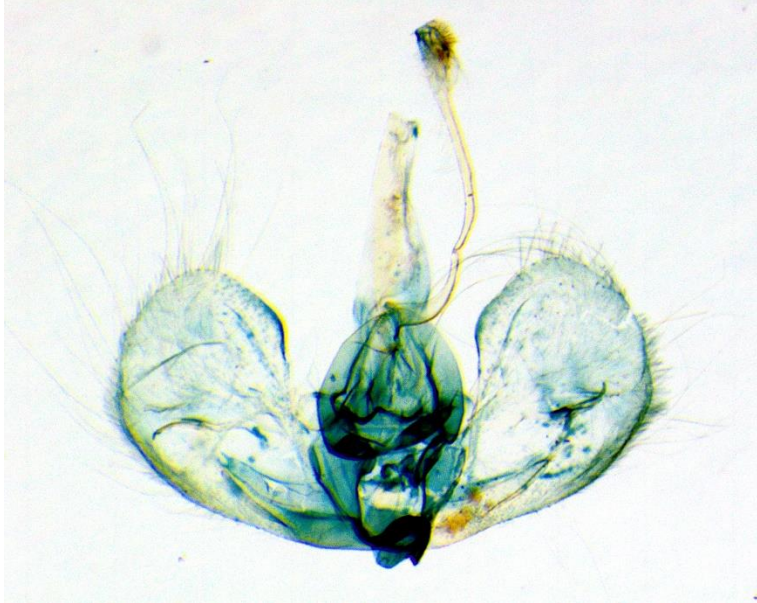

# *Glaucanoe deductalis*

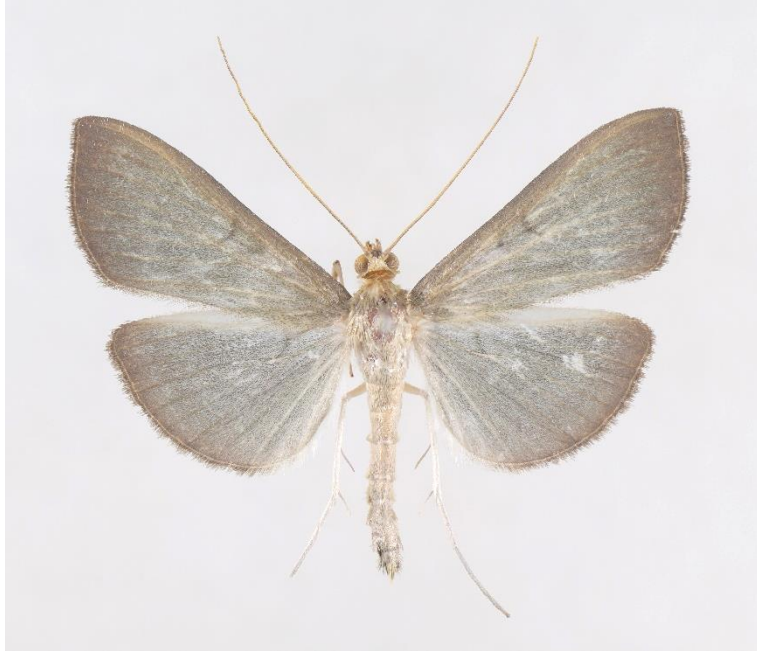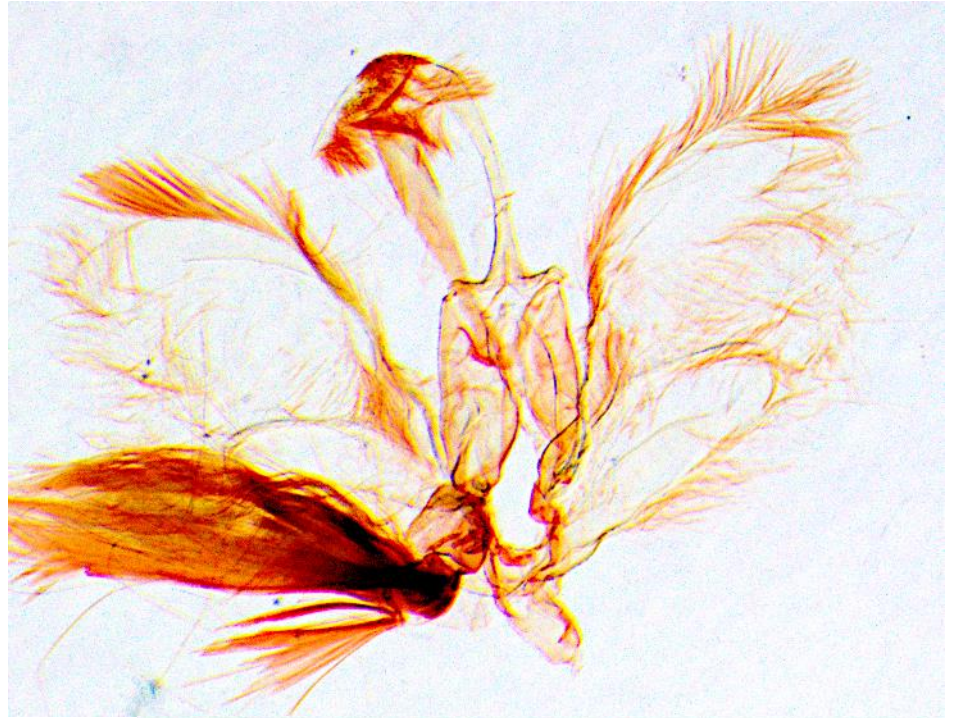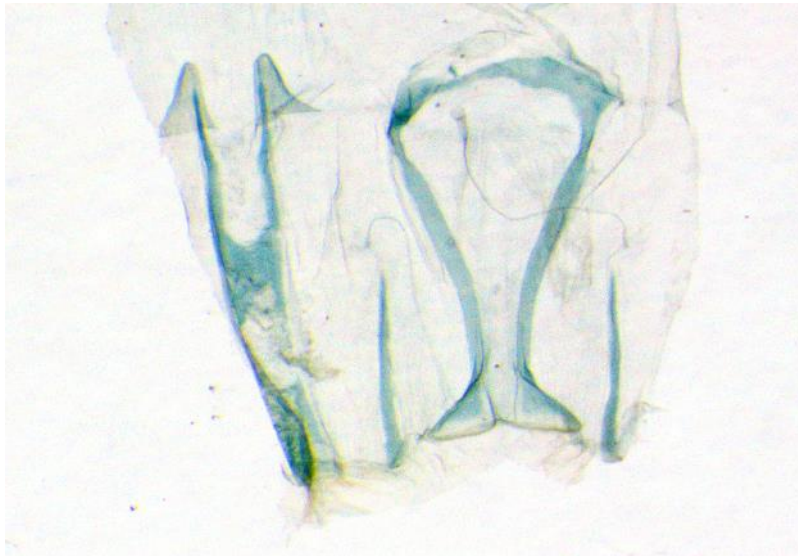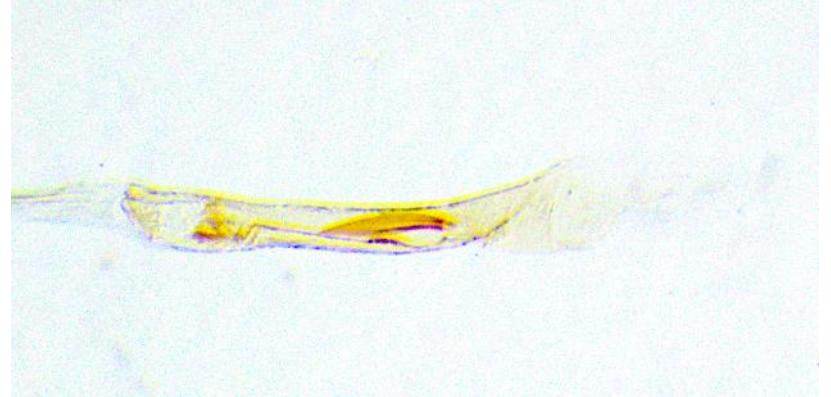



# *Talanga nympa*

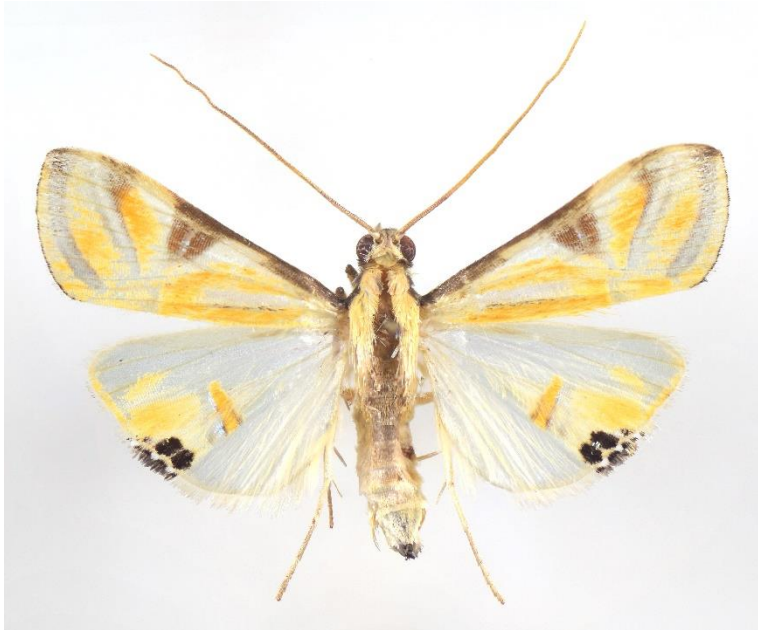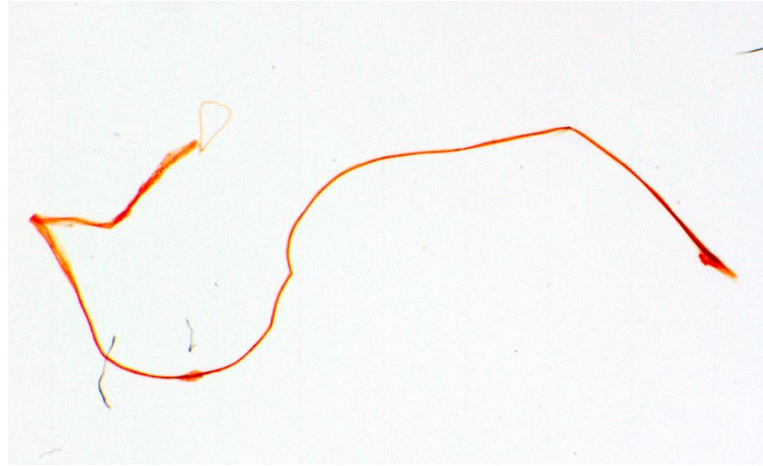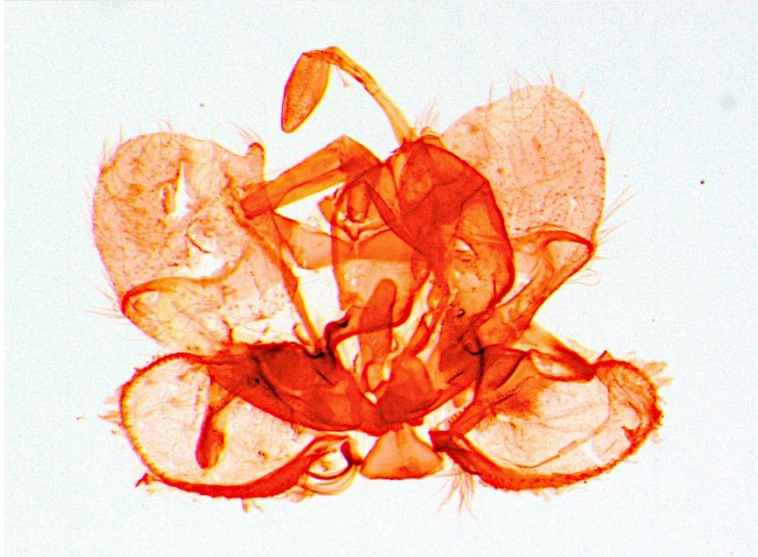

# *Glyphodes nr. bivitralis*

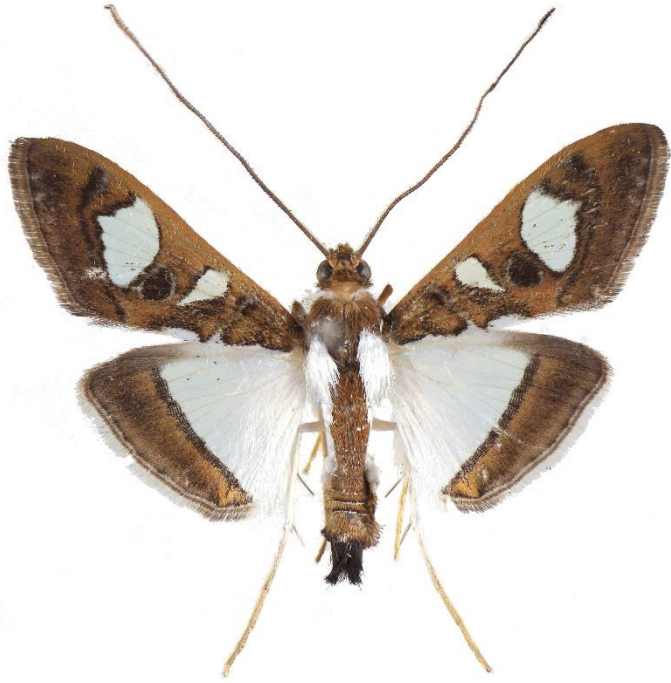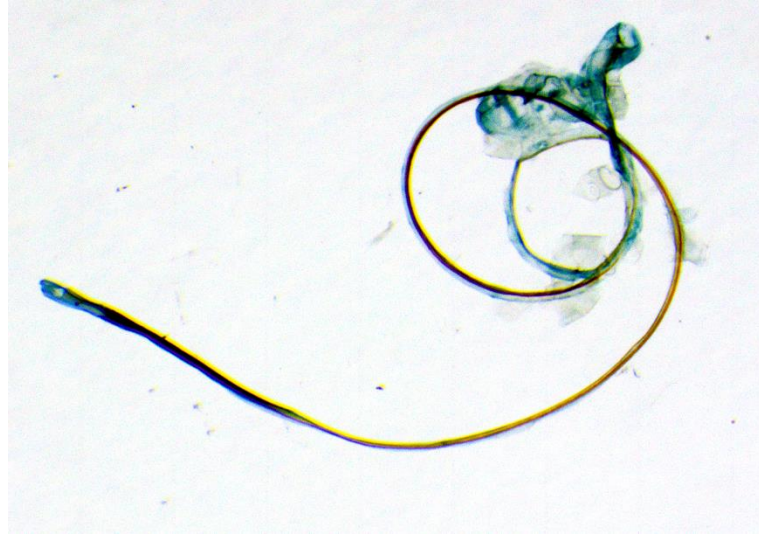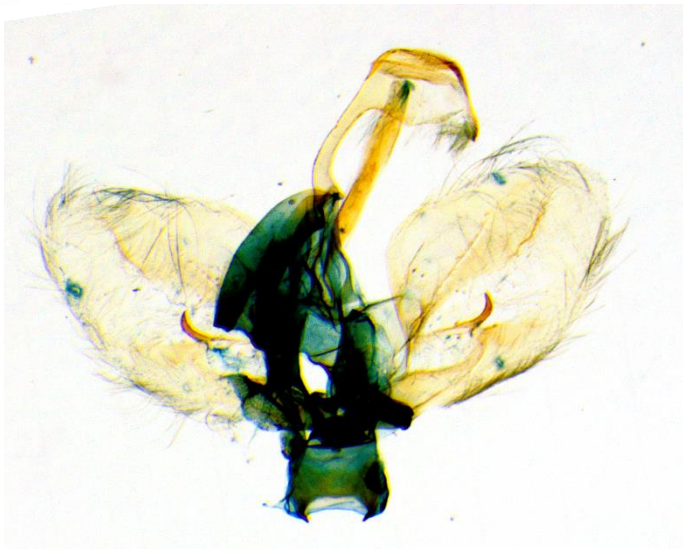



# *Chabula telphusalis*

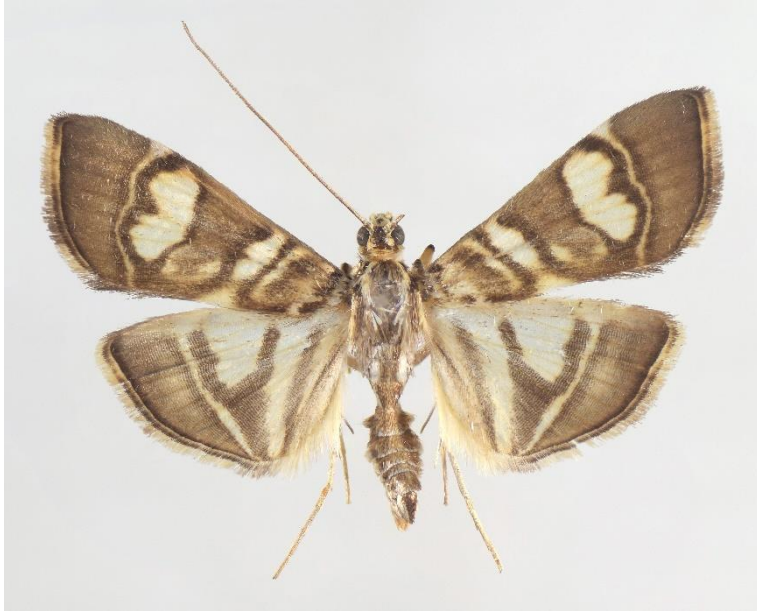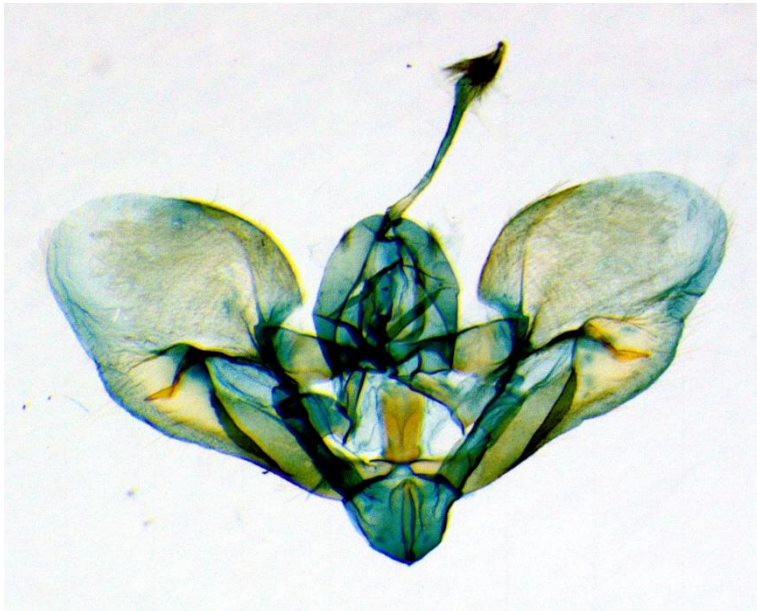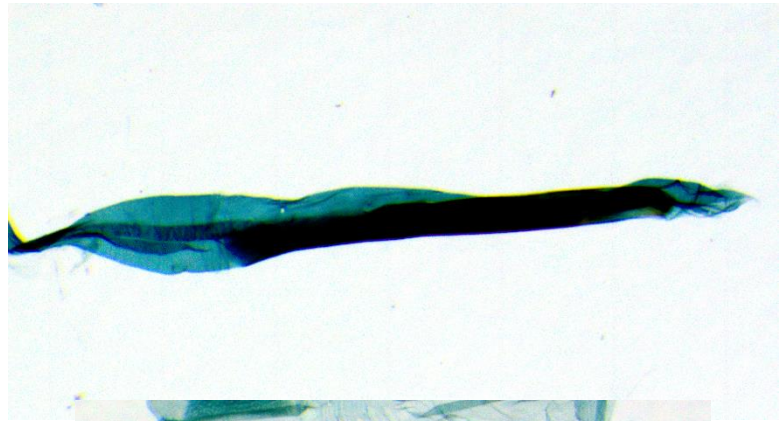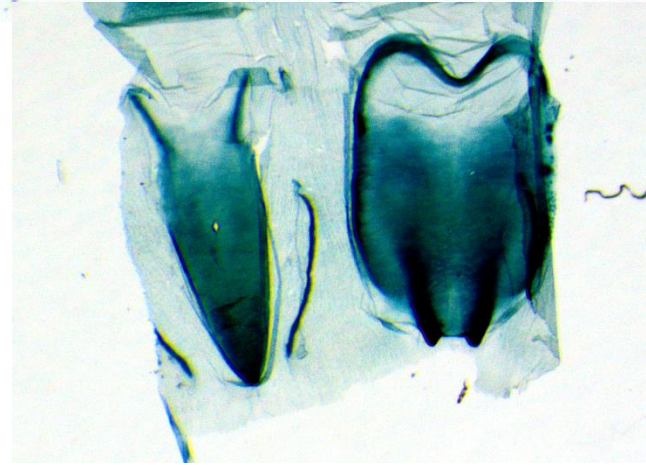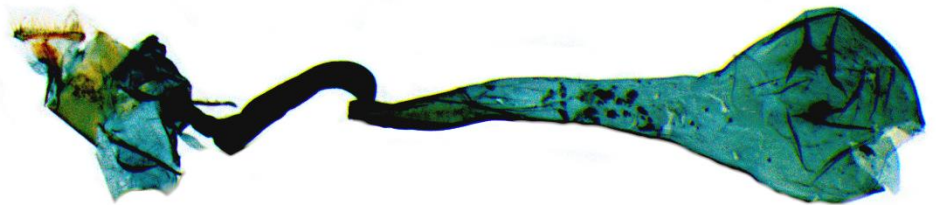

# *Glyphodes quadrimaculalis*

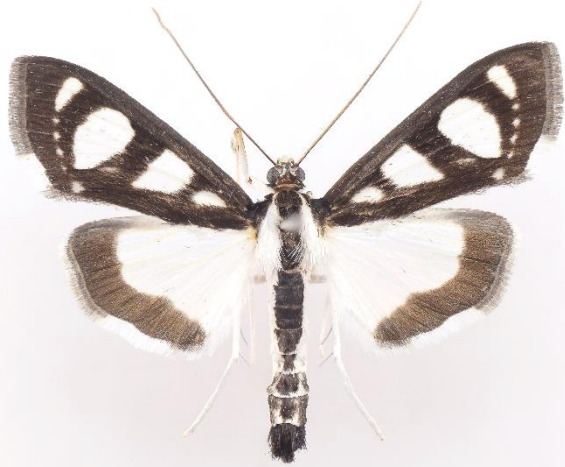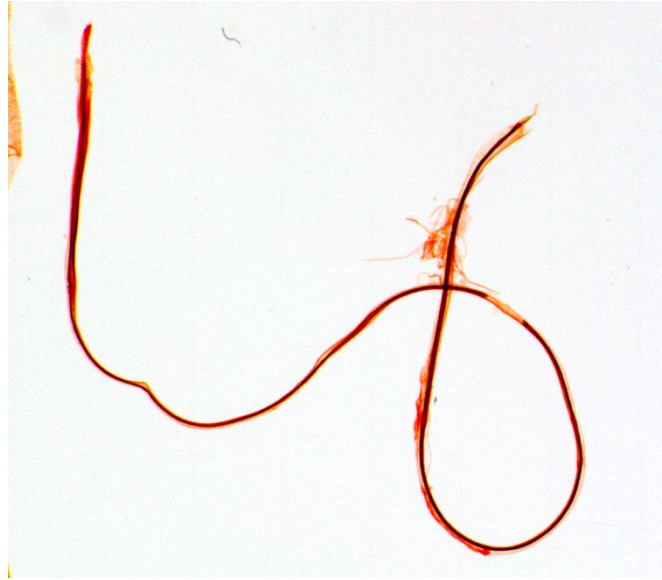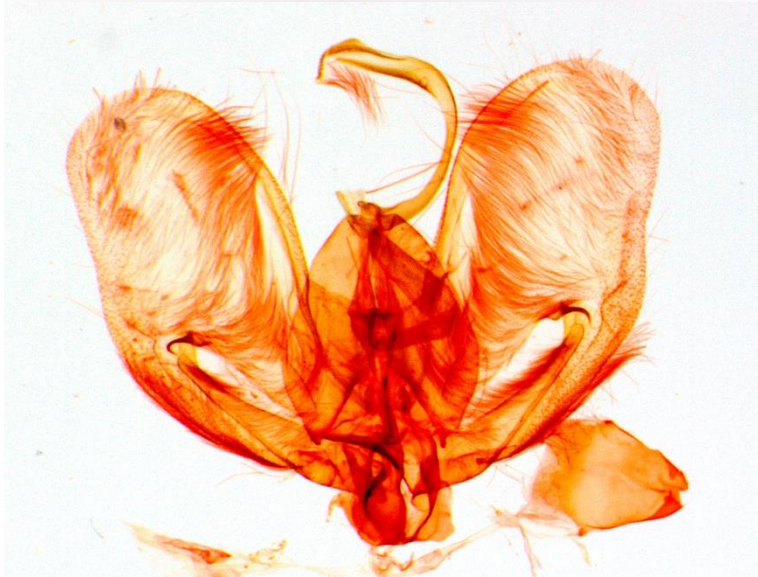



# *Omiodes misera*

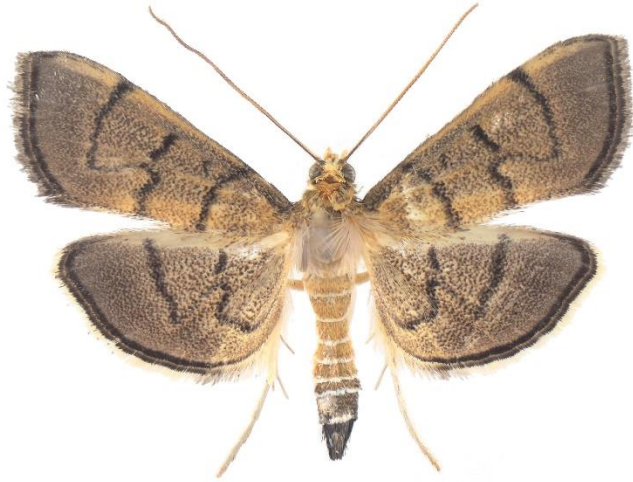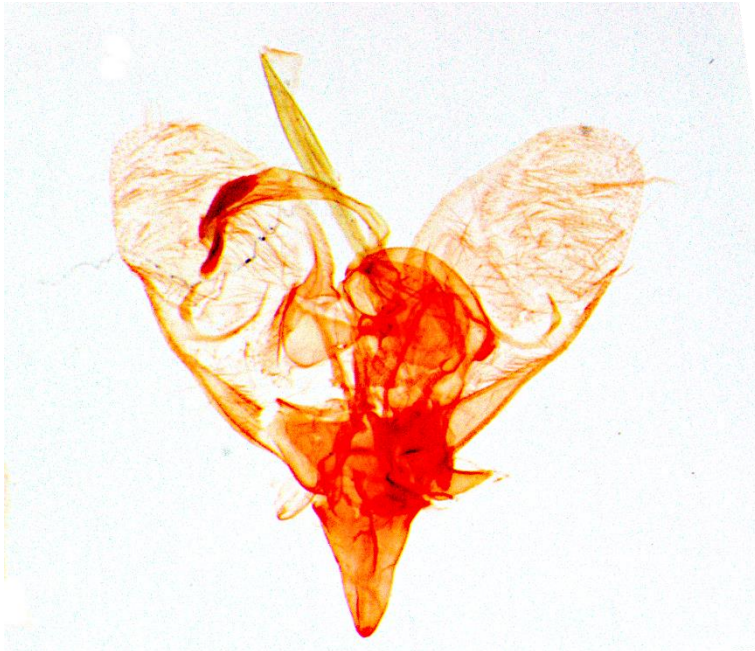

# *Omiodes indistincta*

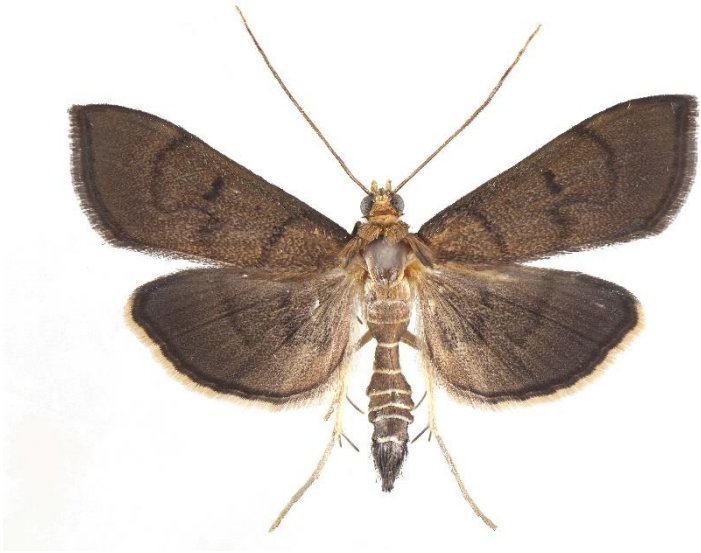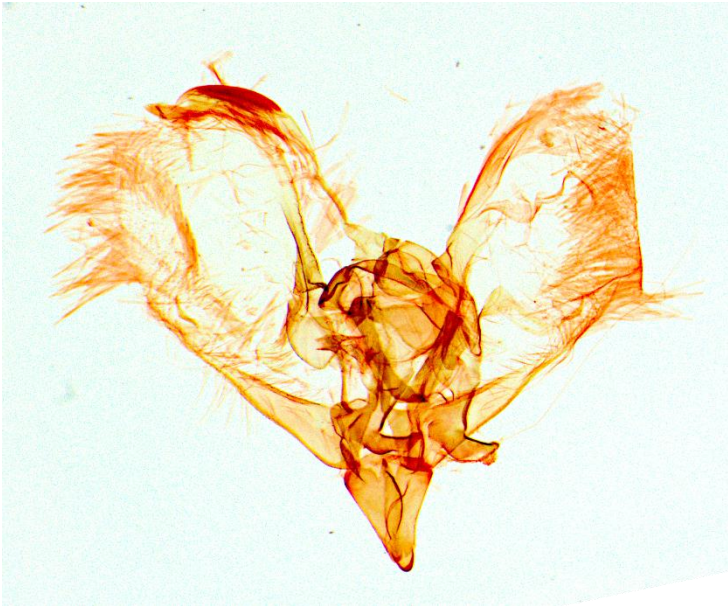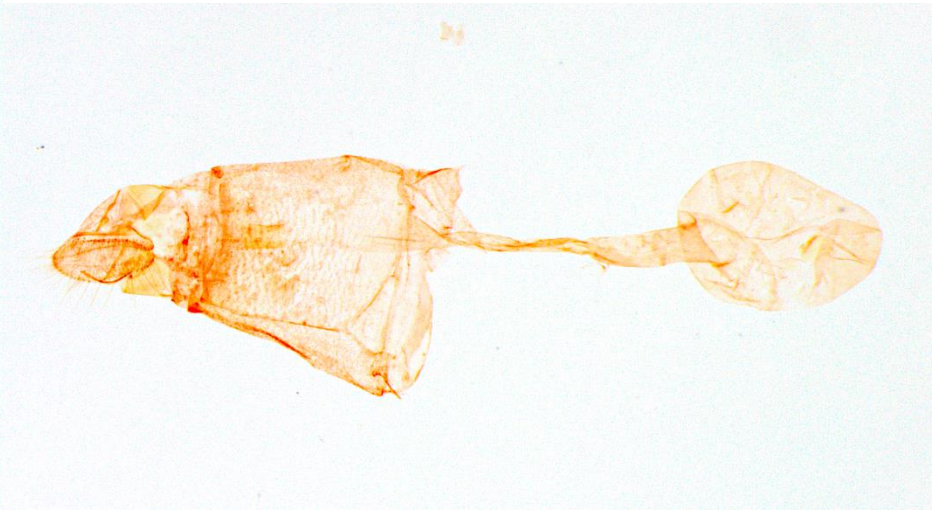



# *Polythlipta liquidalis*

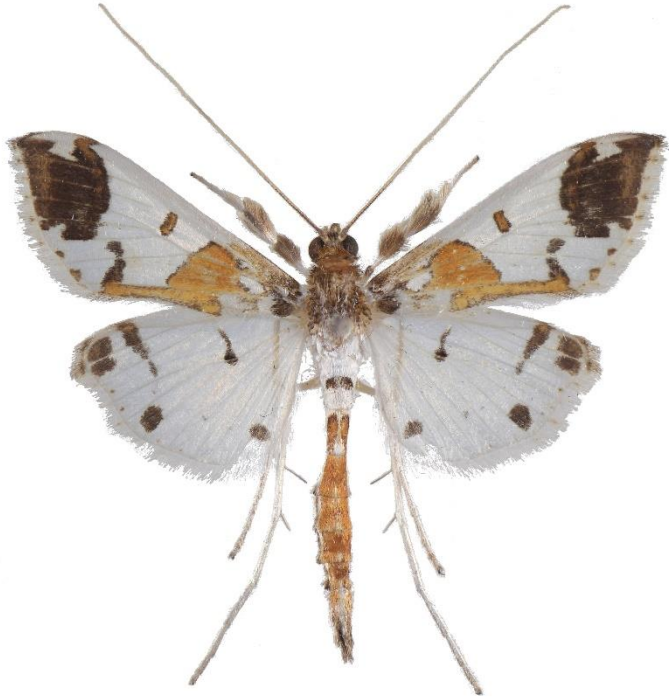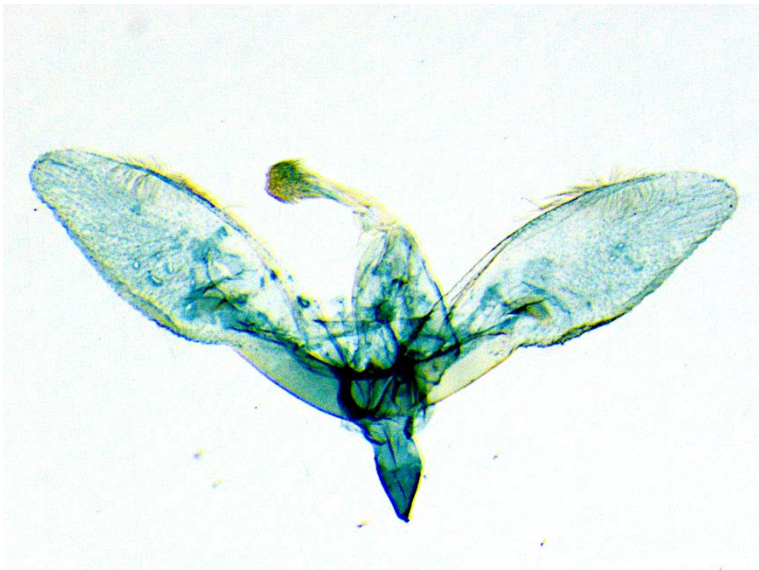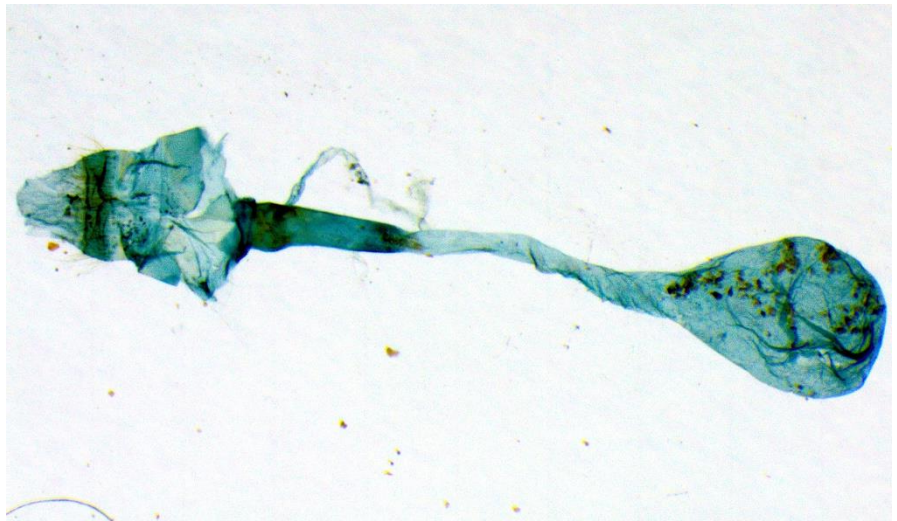

# *Patania deficiens*

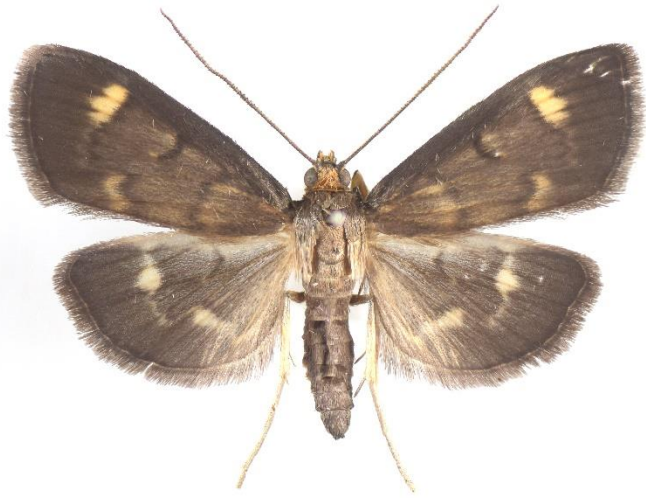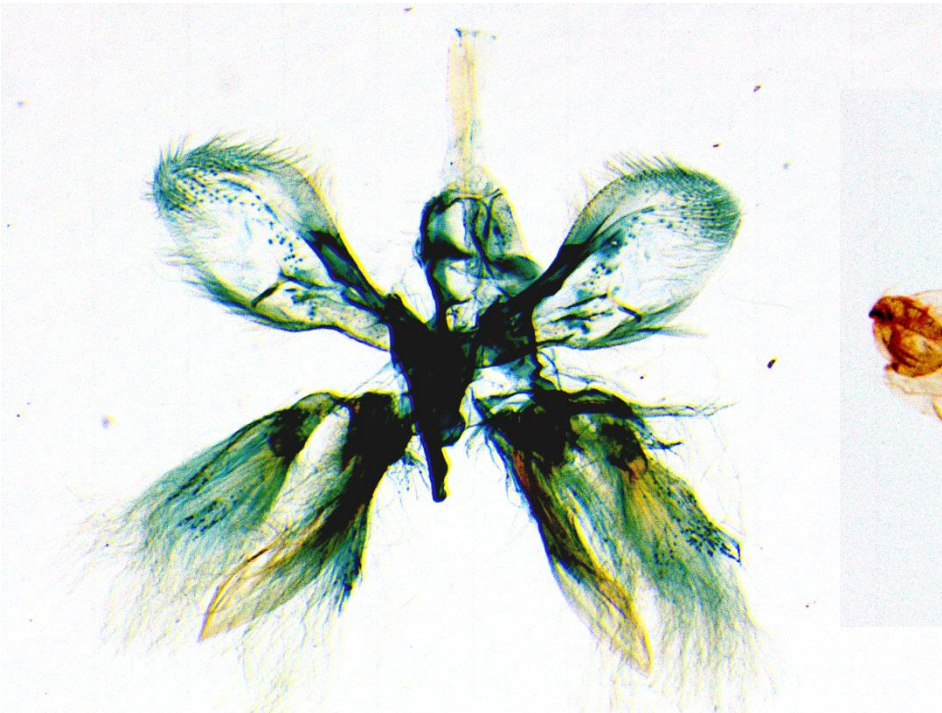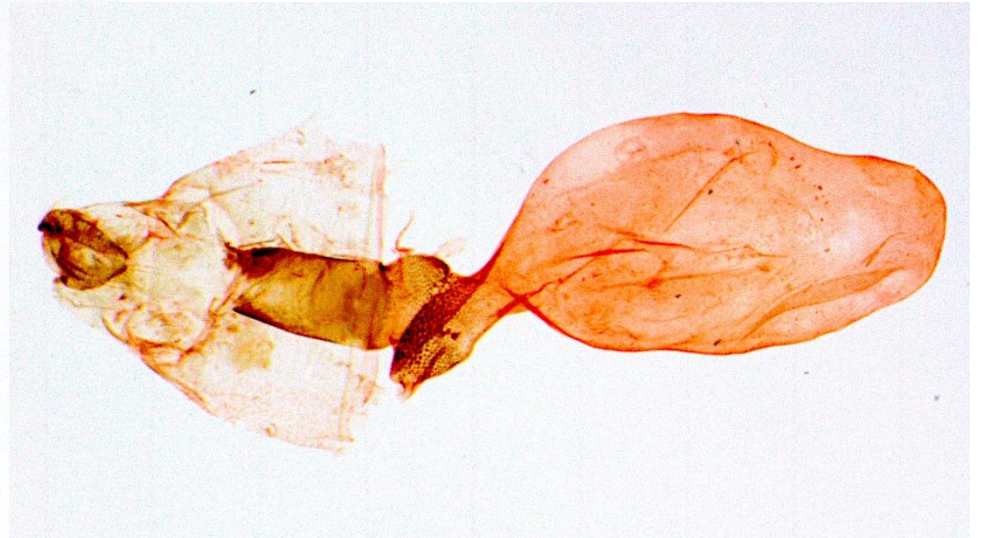



# *Marasmia poeyalis*

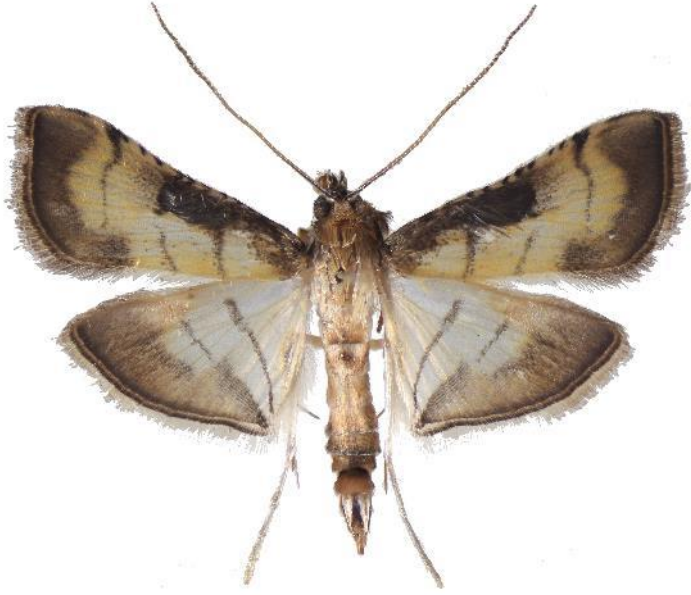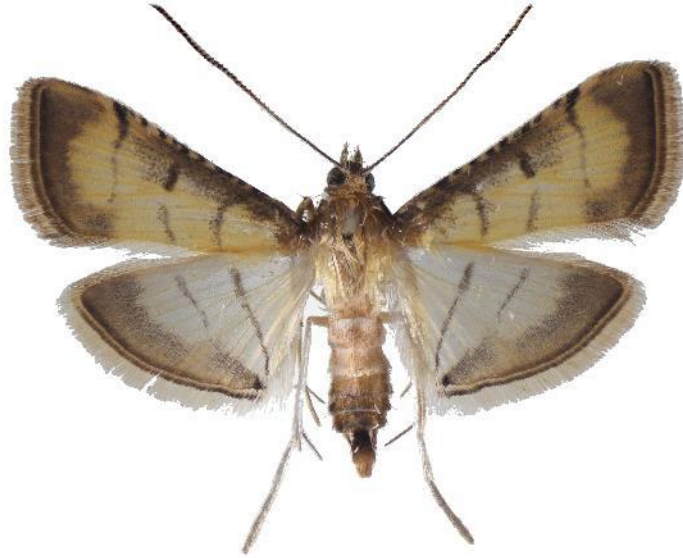

# *Ceratarcha umbrosa*

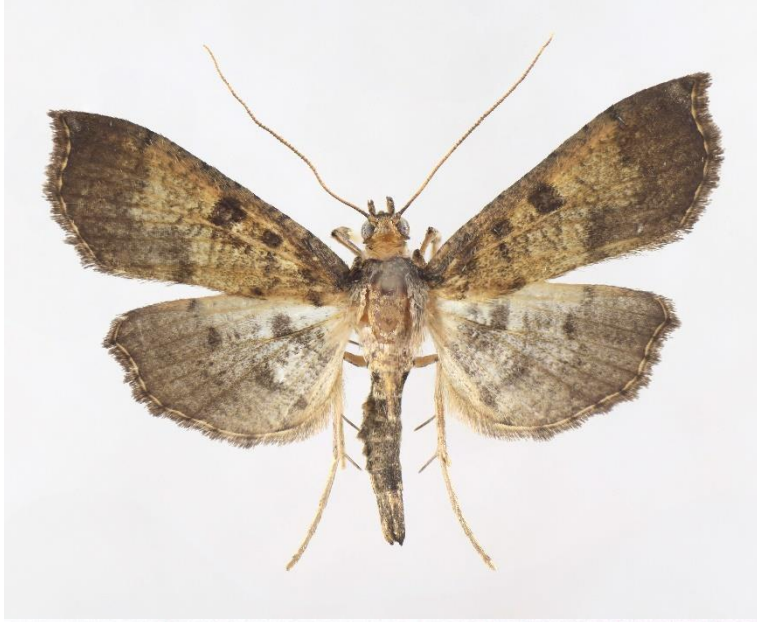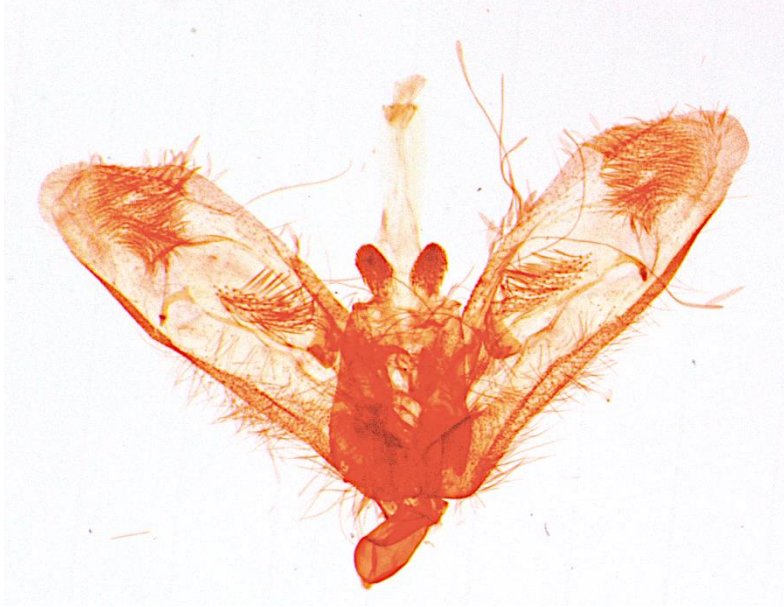



# *Syllepte fuscomarginalis*

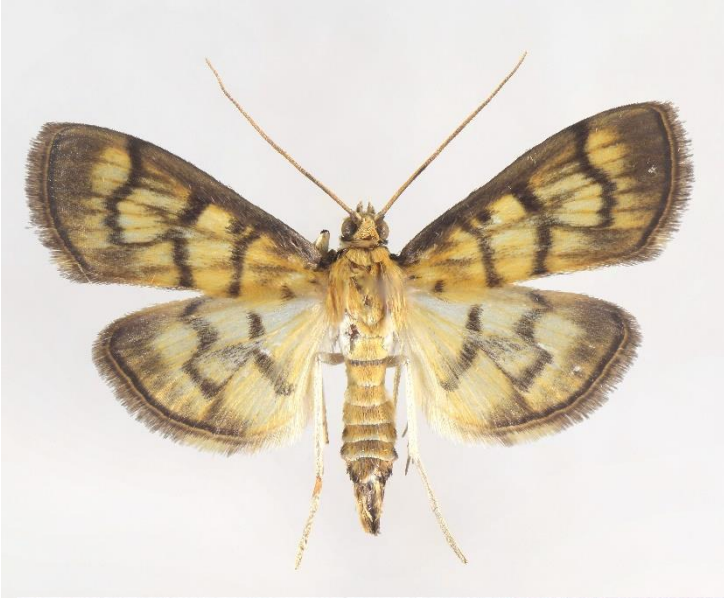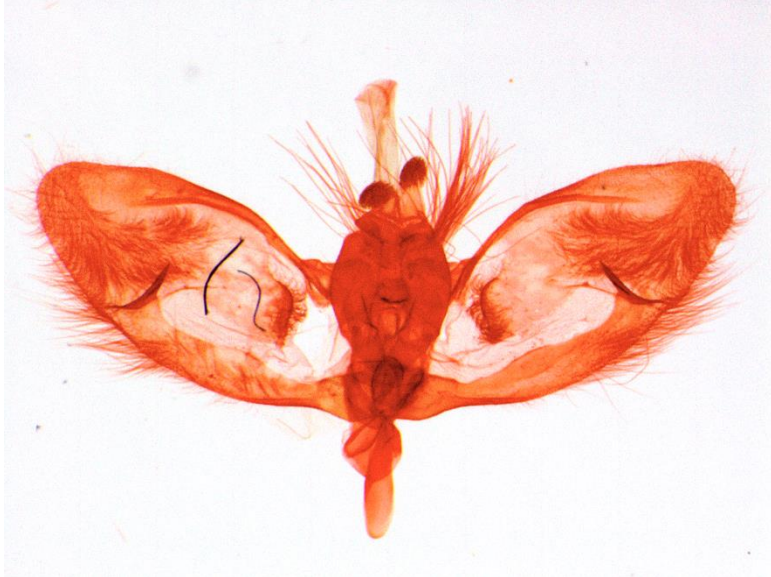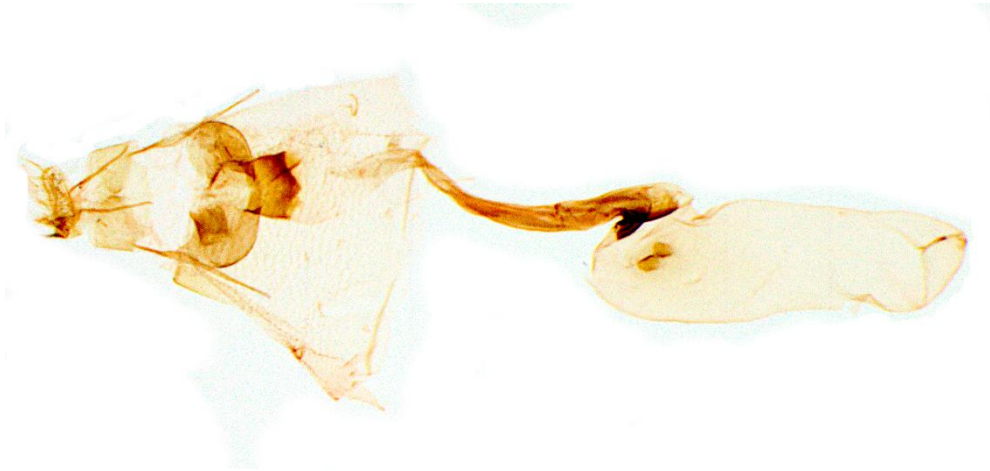

# *Syllepte taiwanalis*

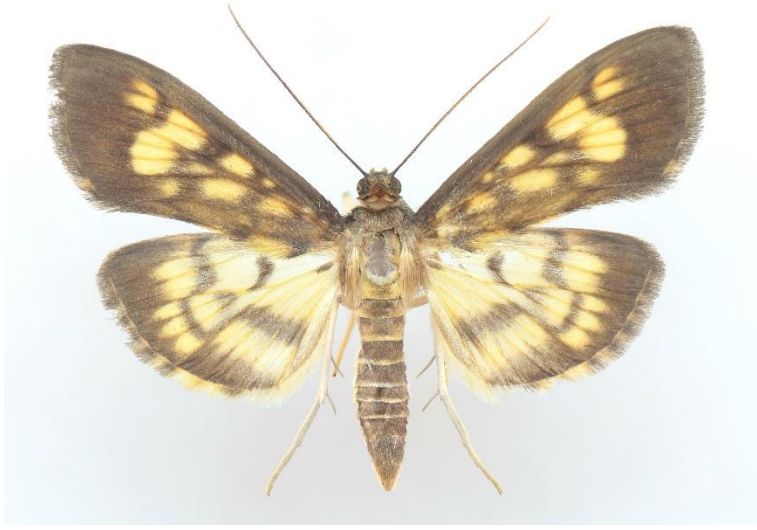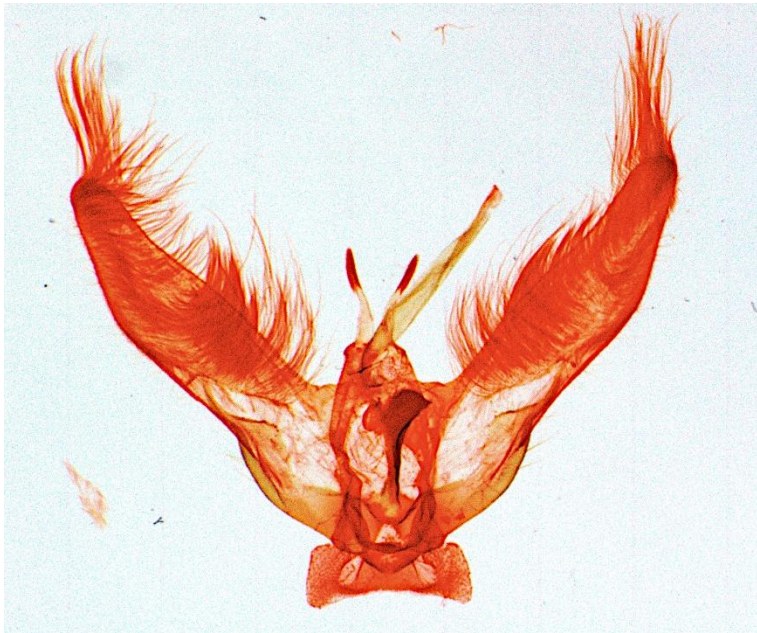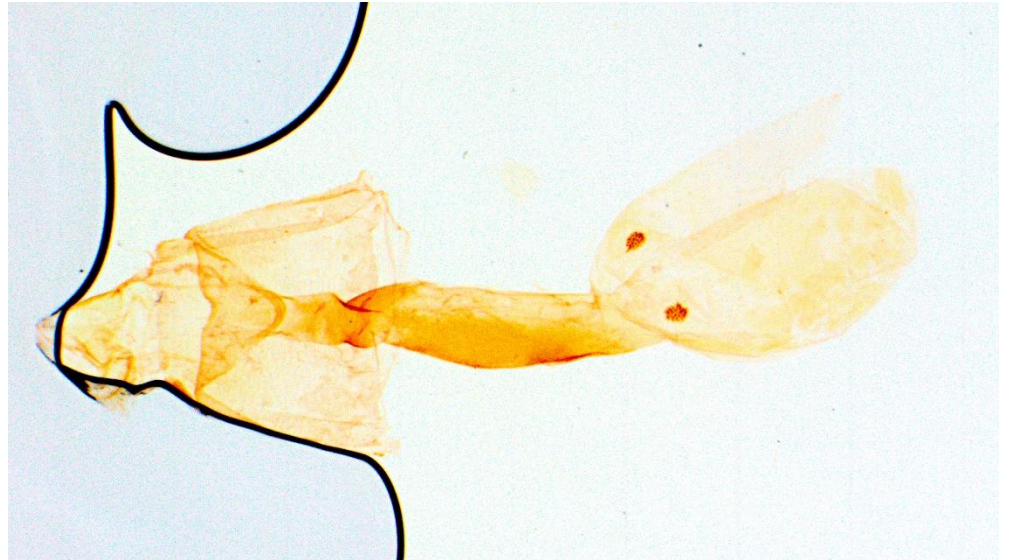



# *Pycnarmon lactiferalis*

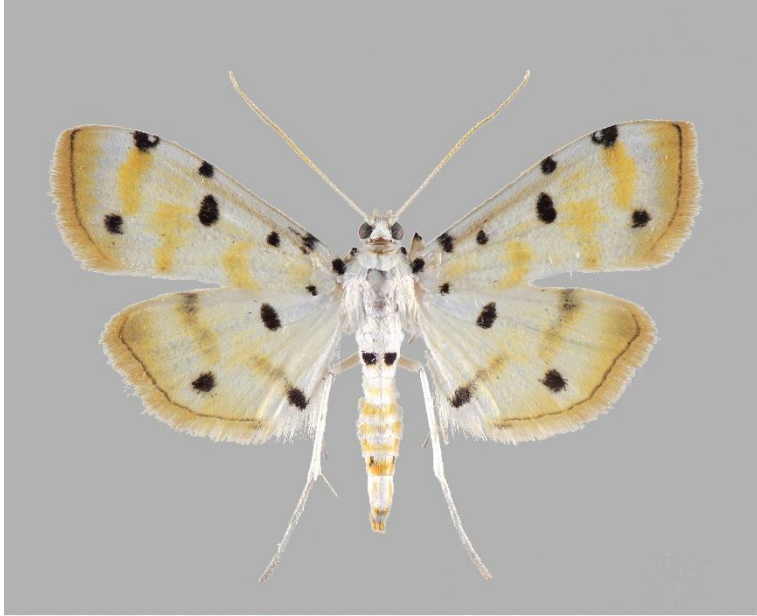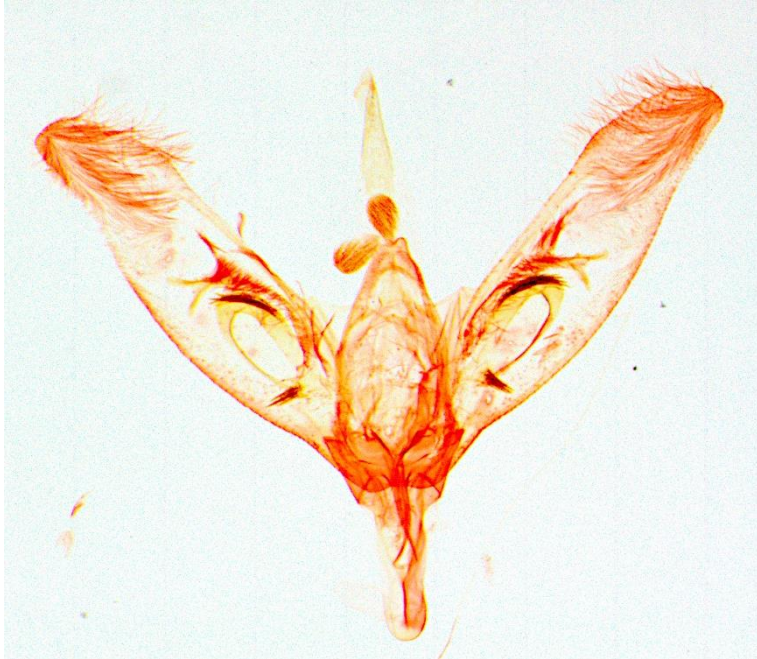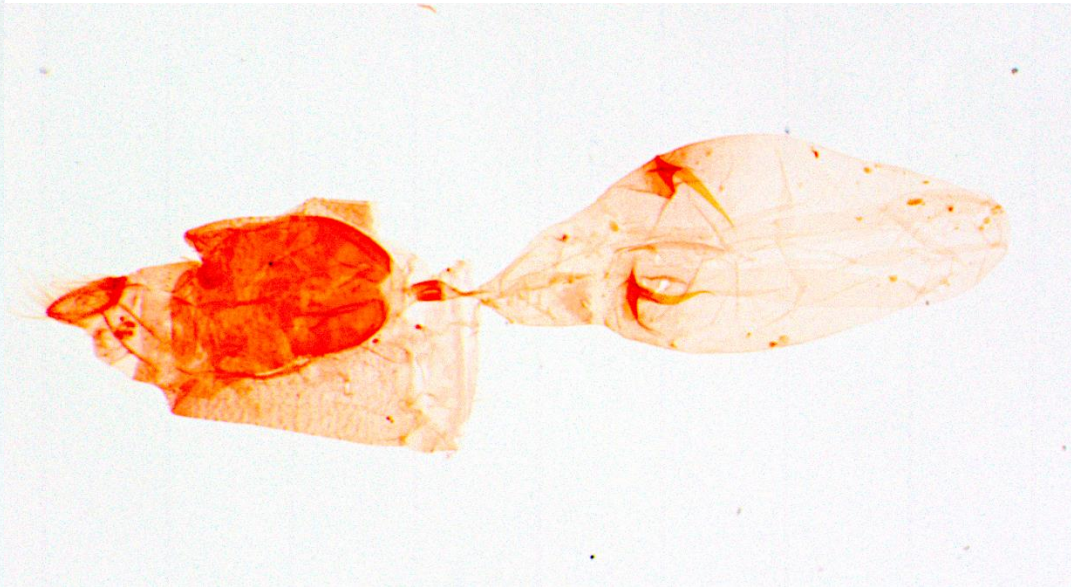

# *Preneopogon catenalis*

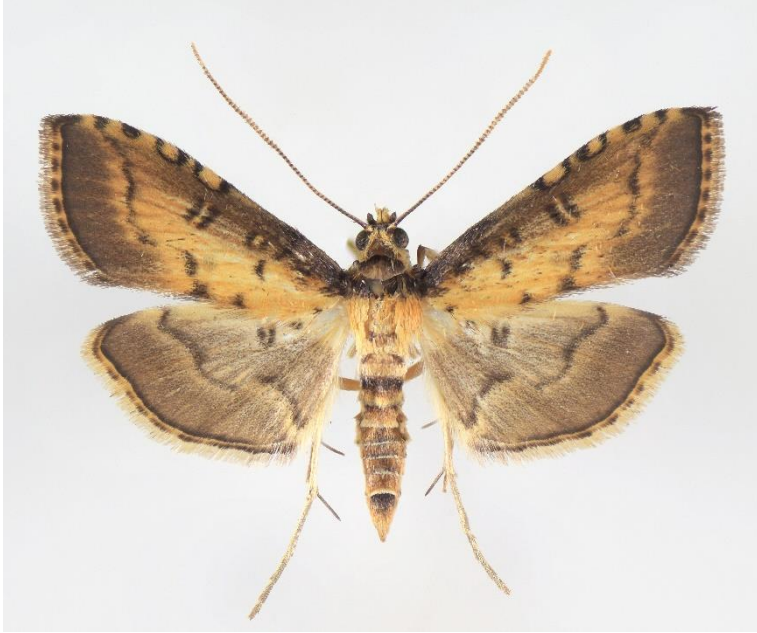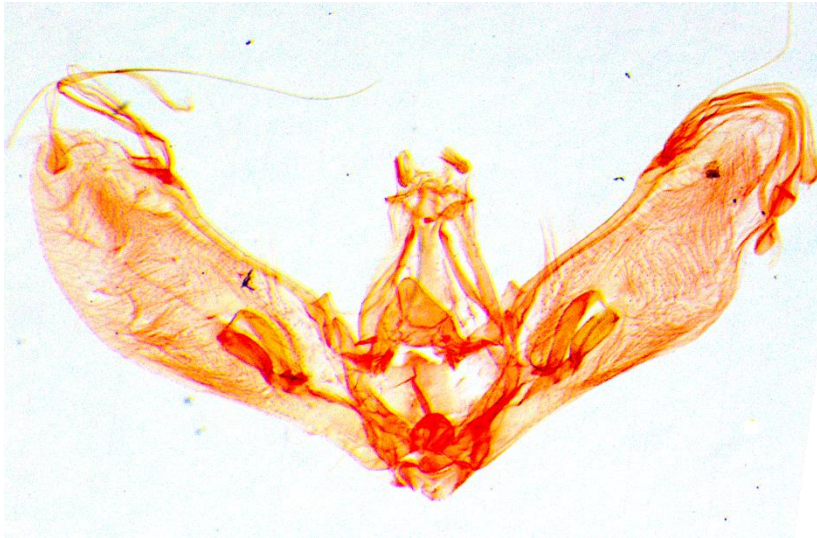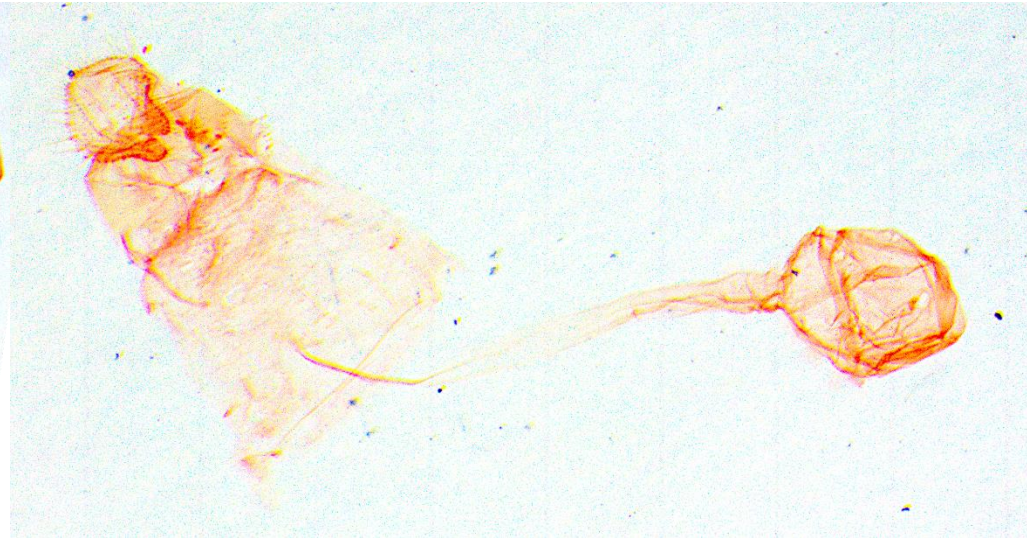



# *Massepha ohbai*

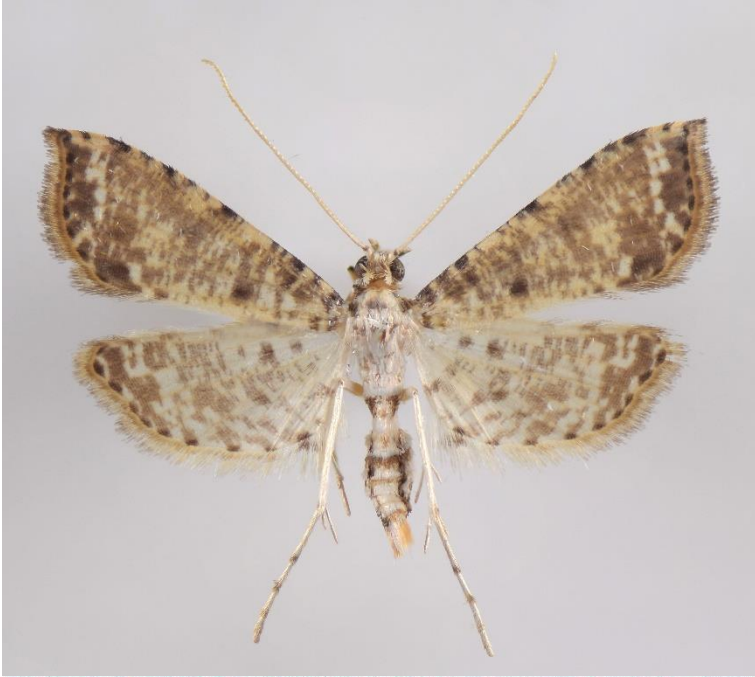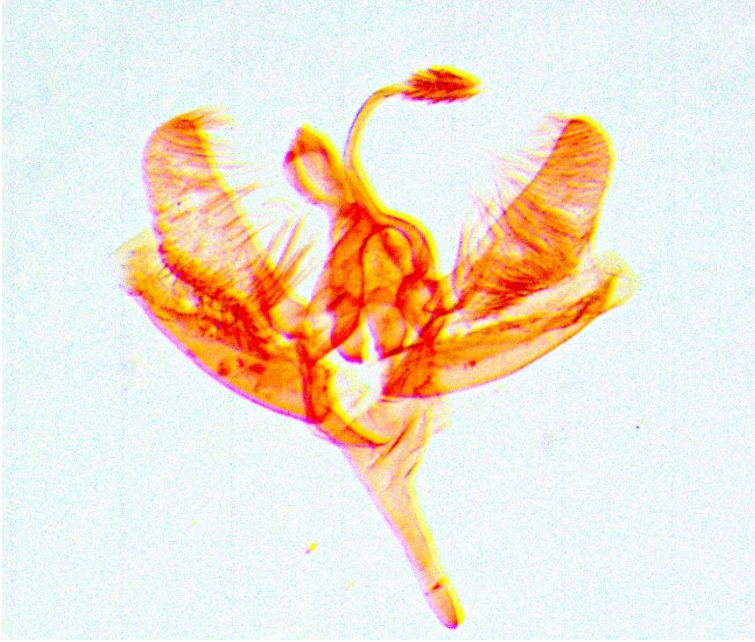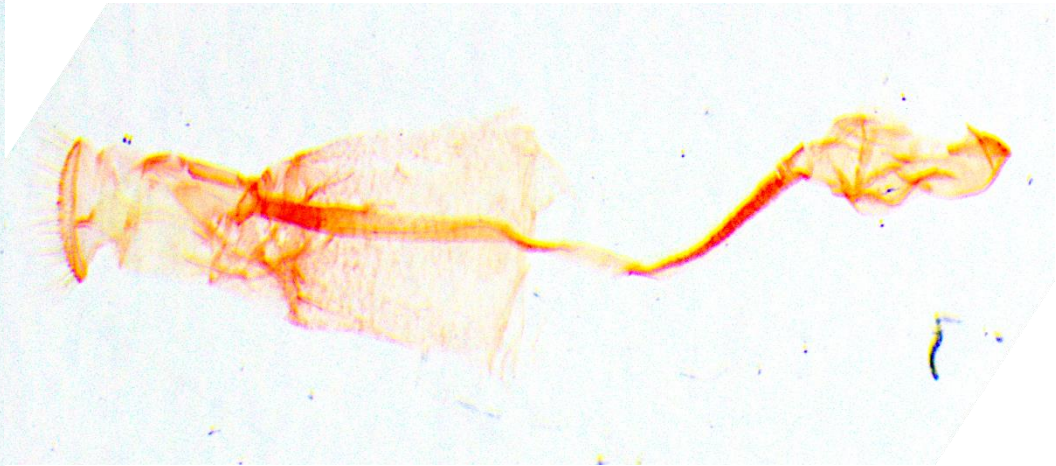

# *Metoecca foedalis*

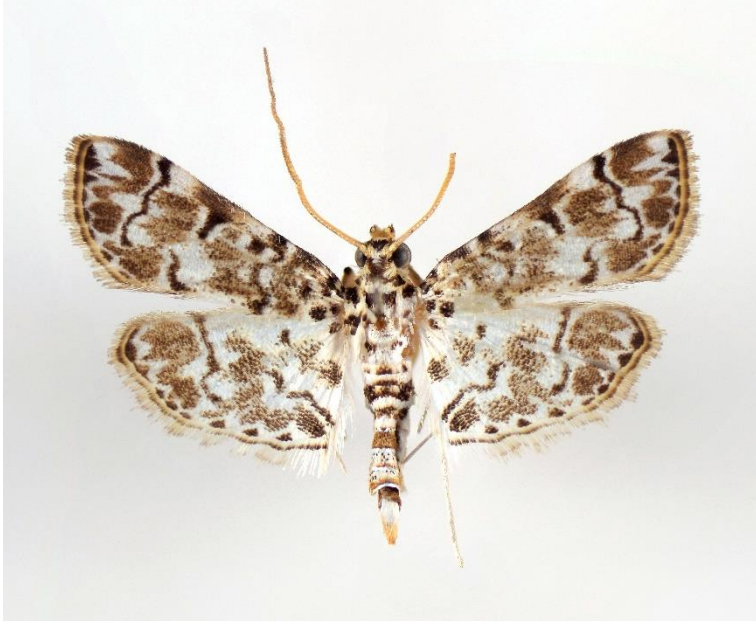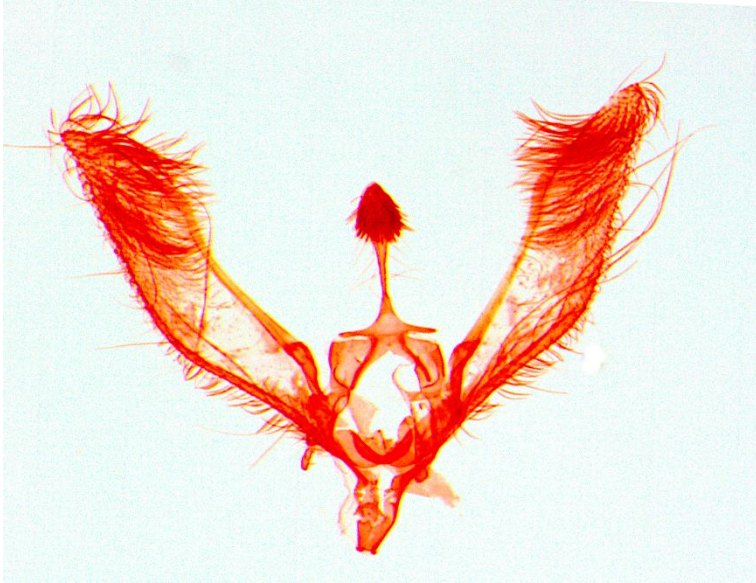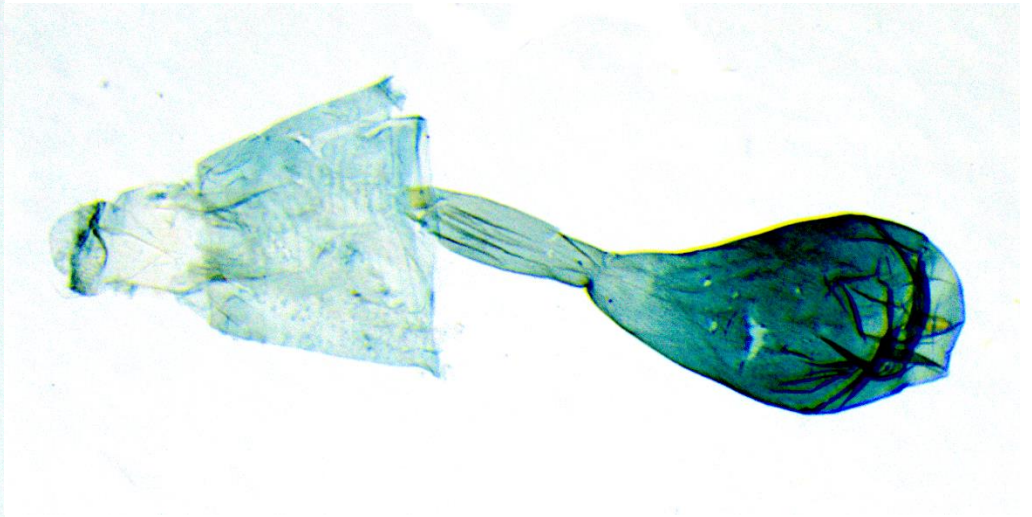



# *Protonoceras capitalis*

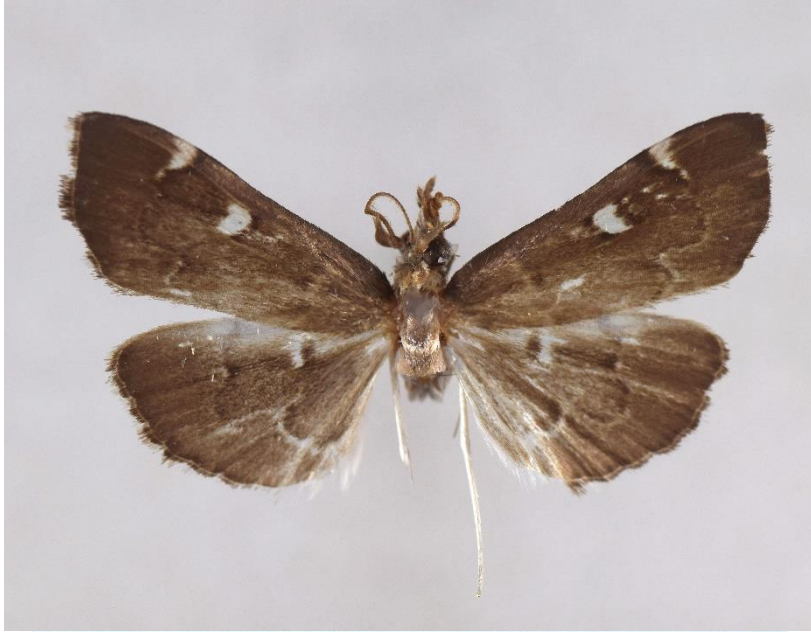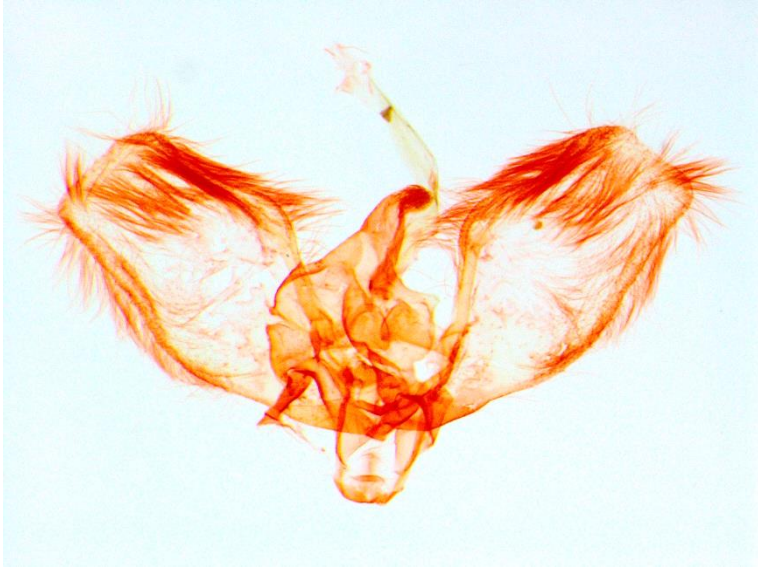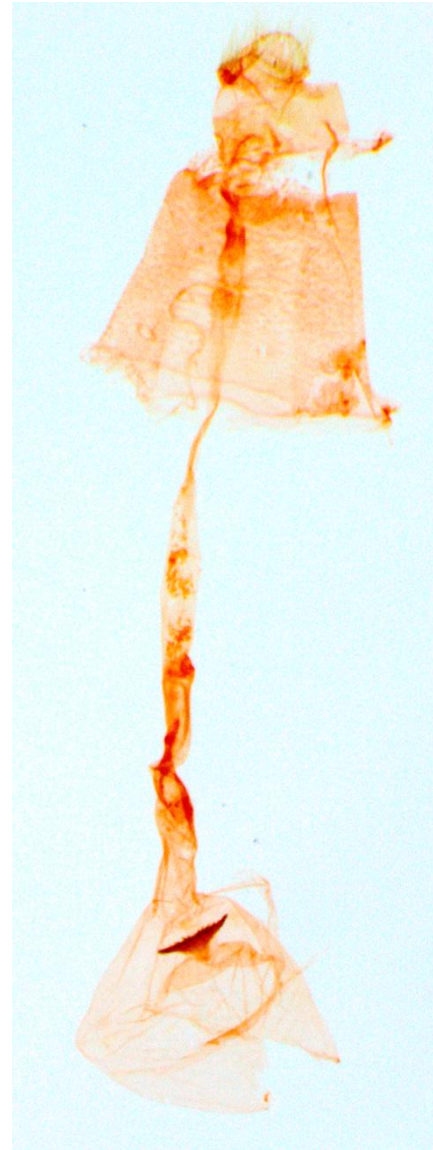

# *Metasia coniotalis*

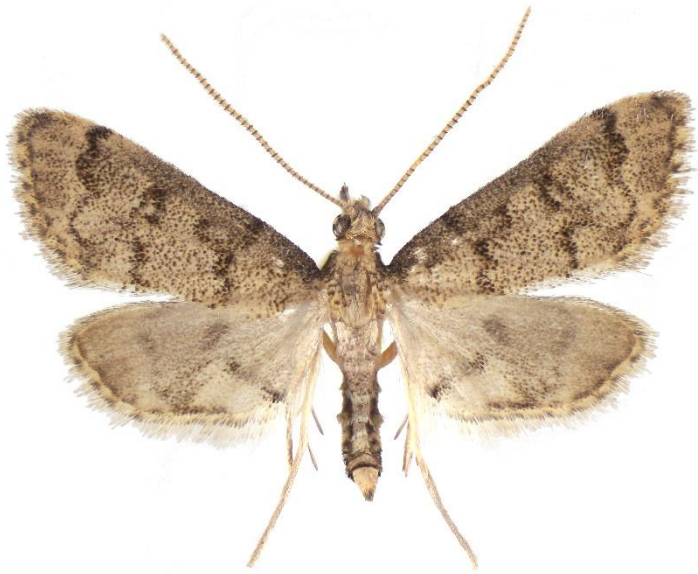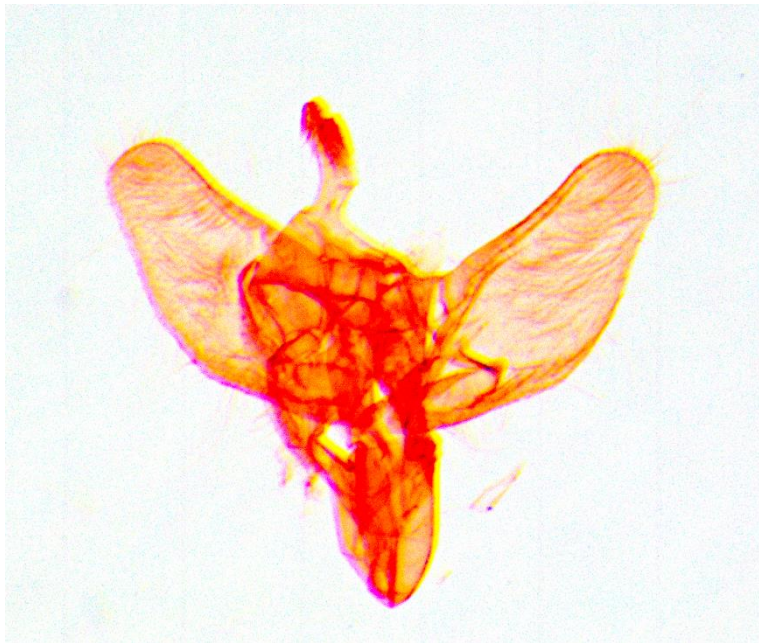



# *Nacoleia satsumalis*

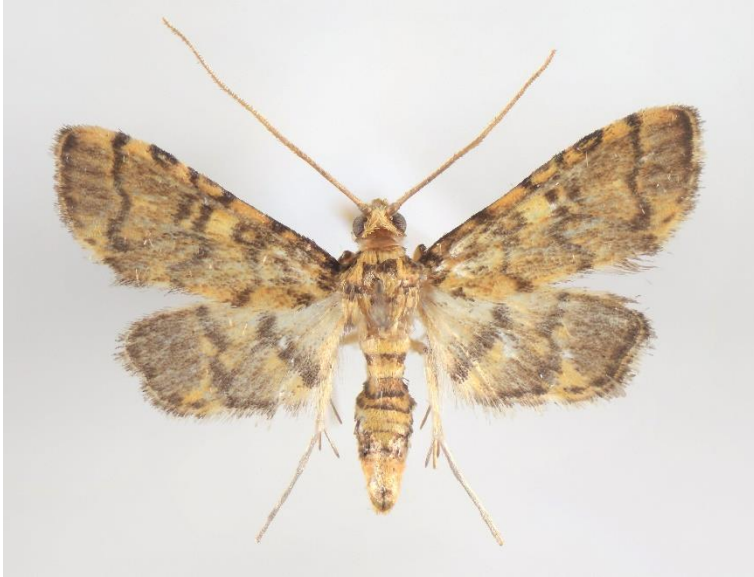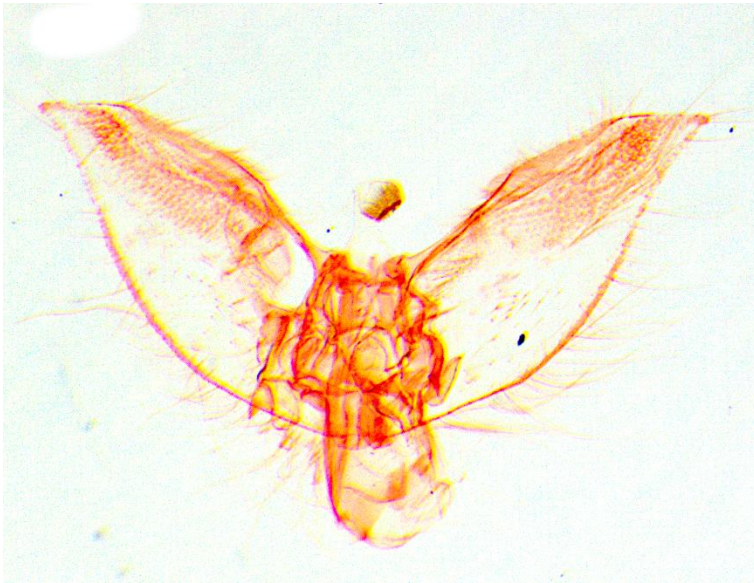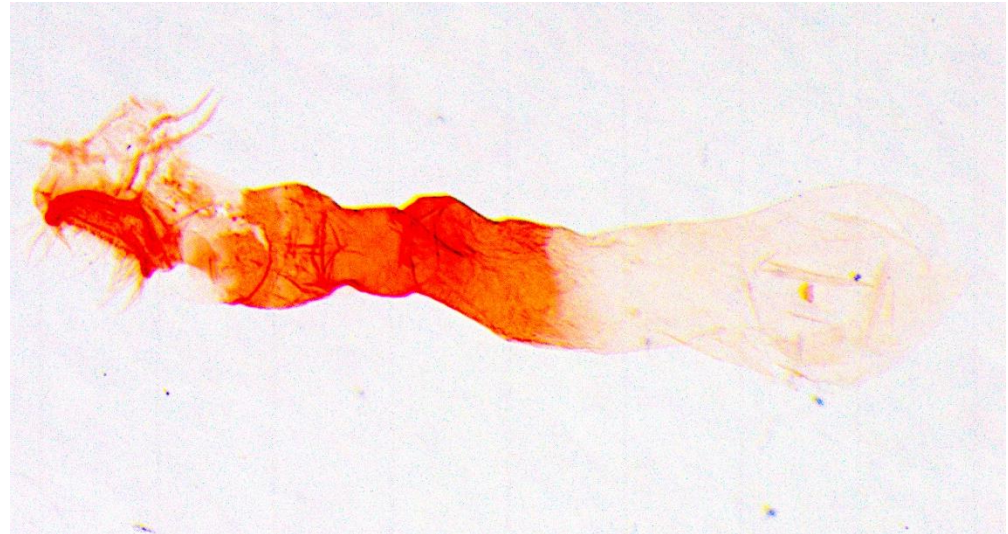

# *Nacoleia tampiusalis*

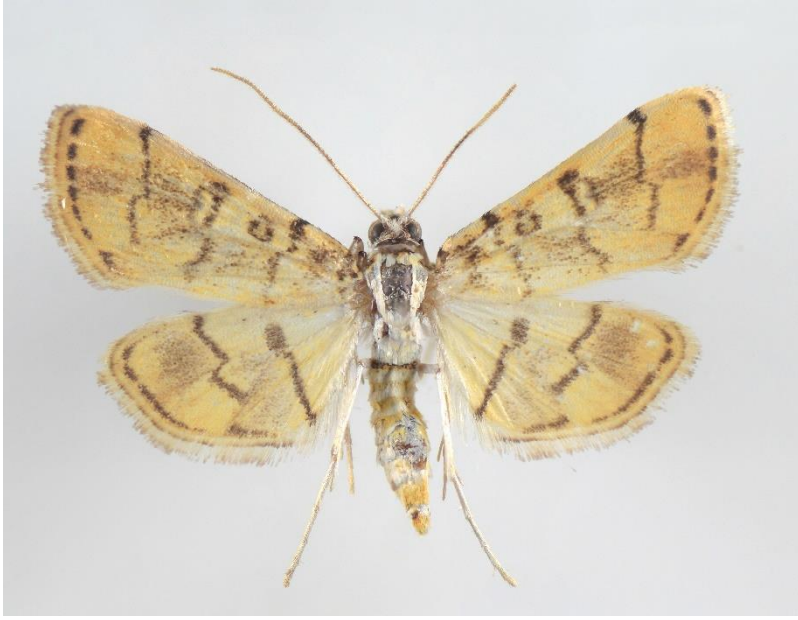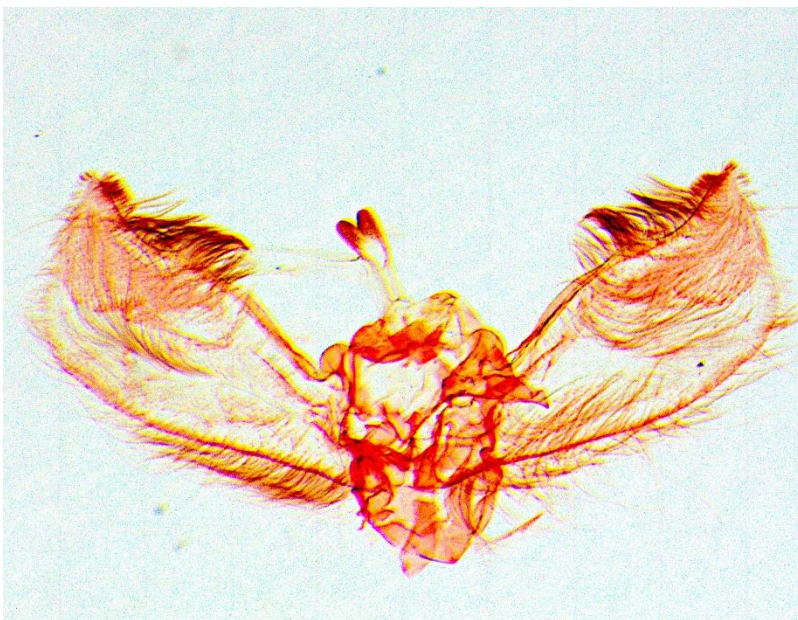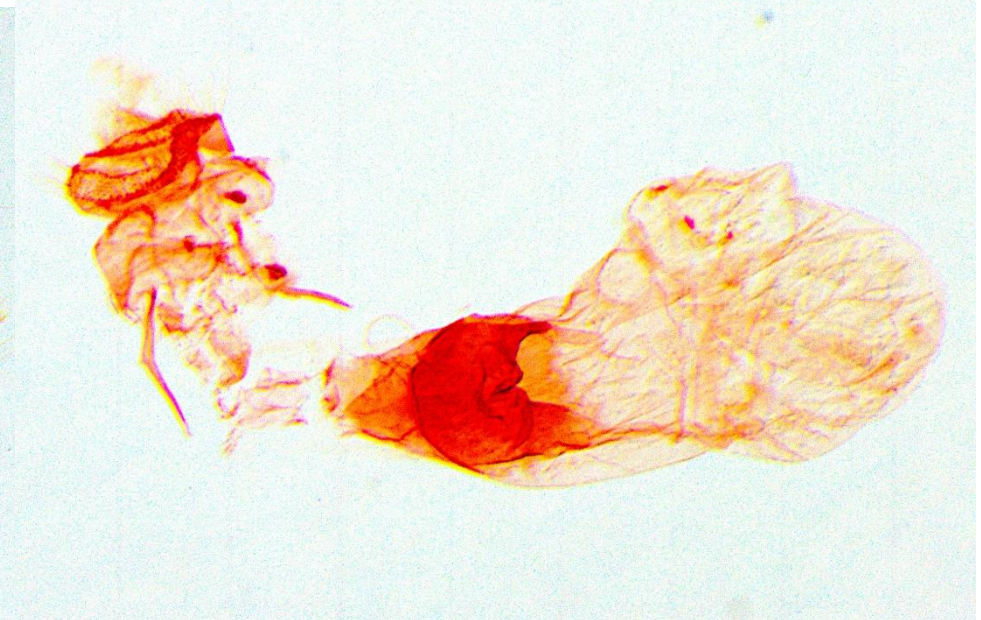



# *Mabra charonialis*

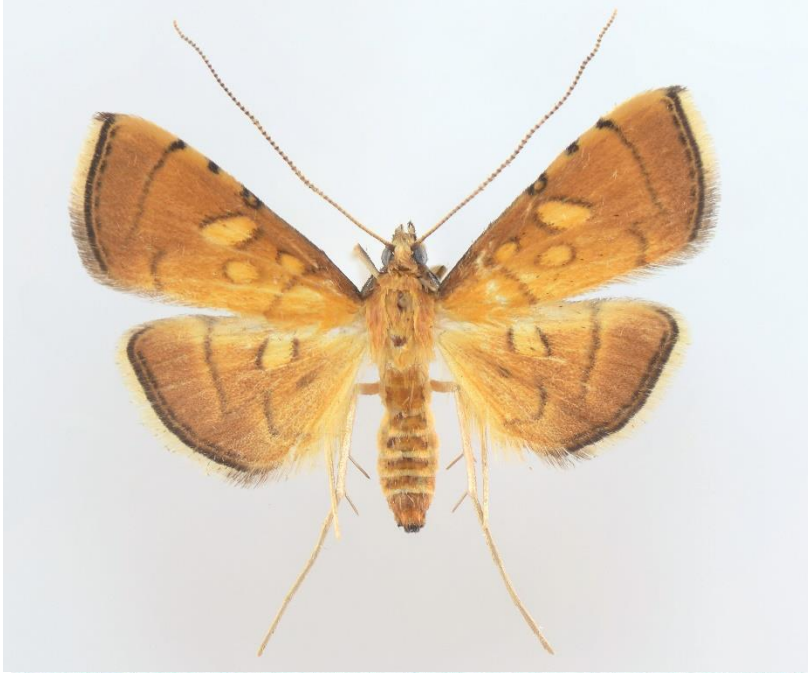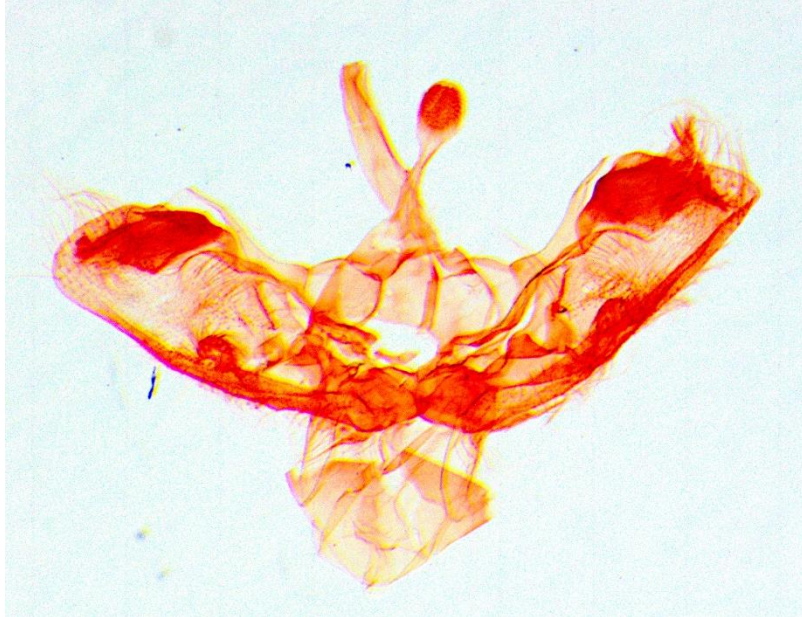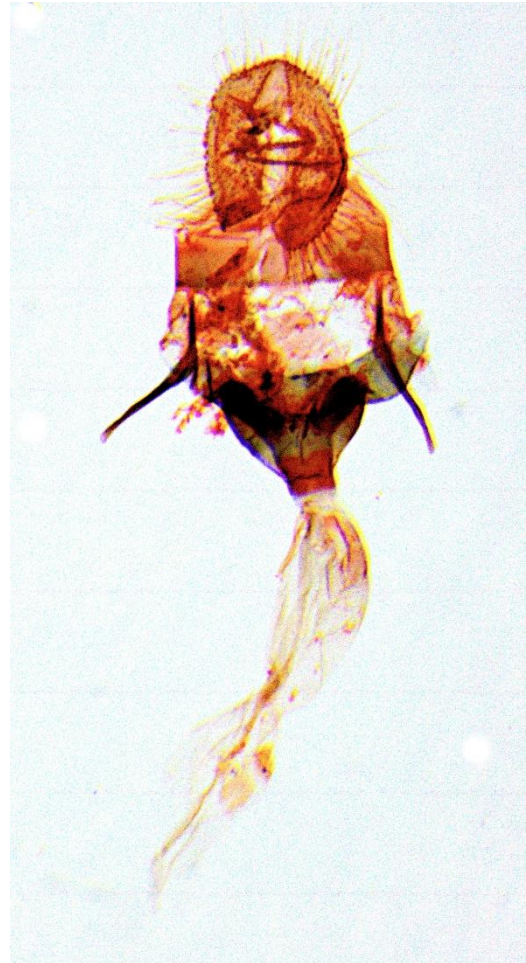



# *Camptomastix hisbonalis*

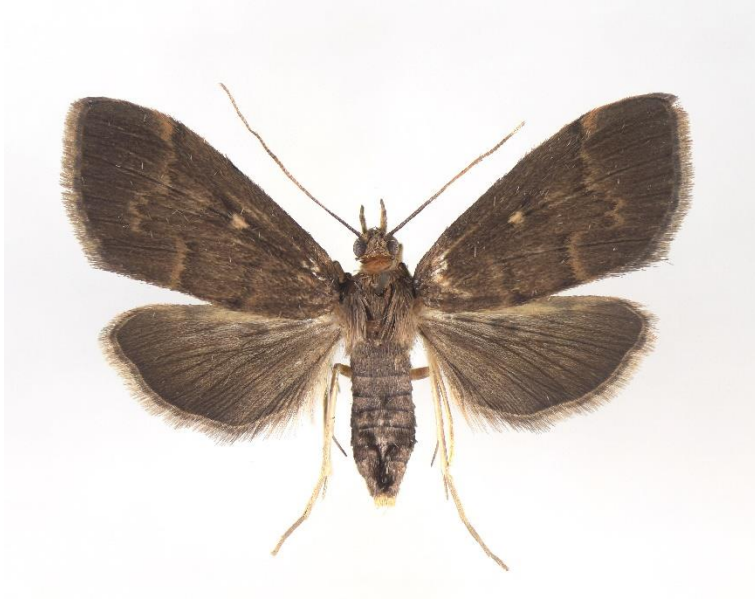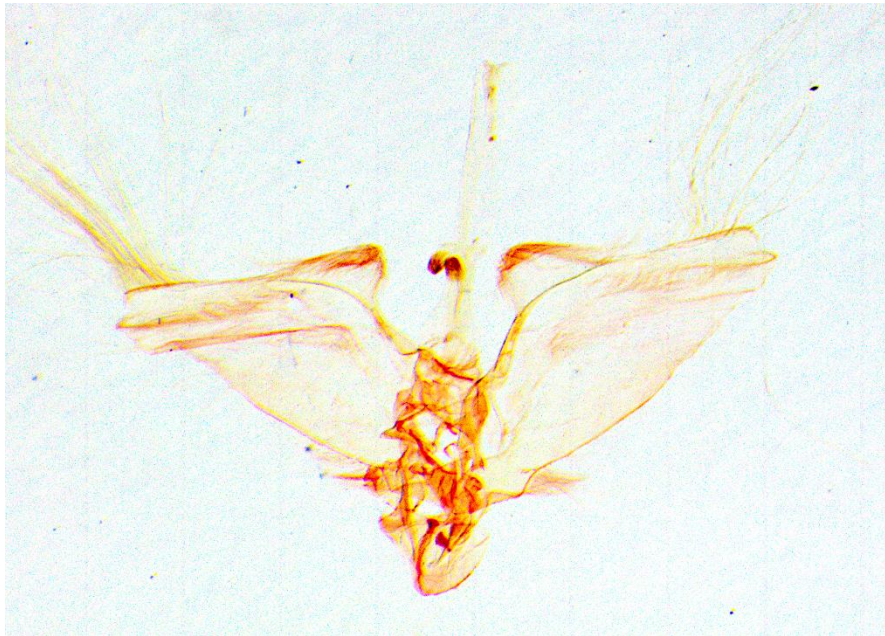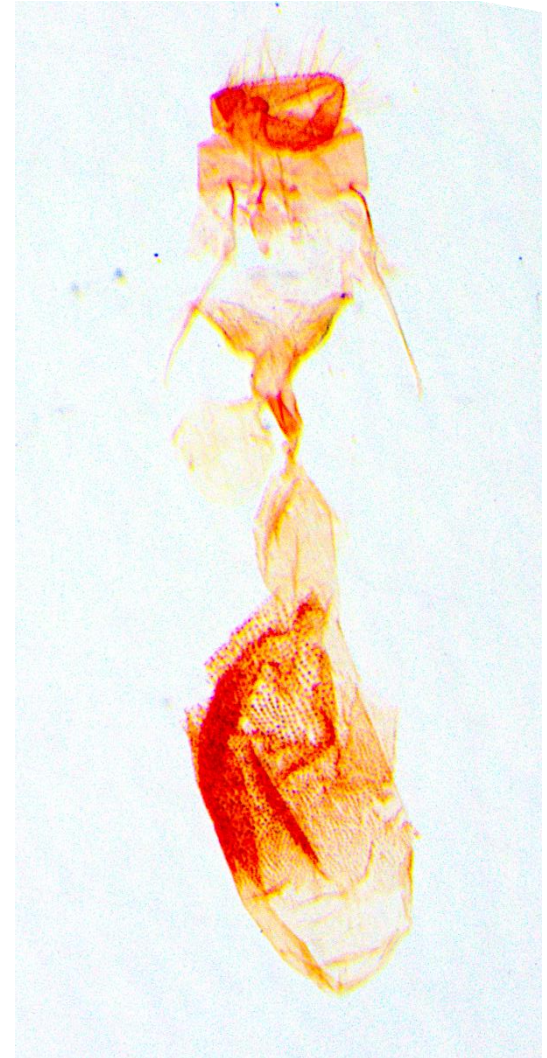



# *Nacoleia commixta*

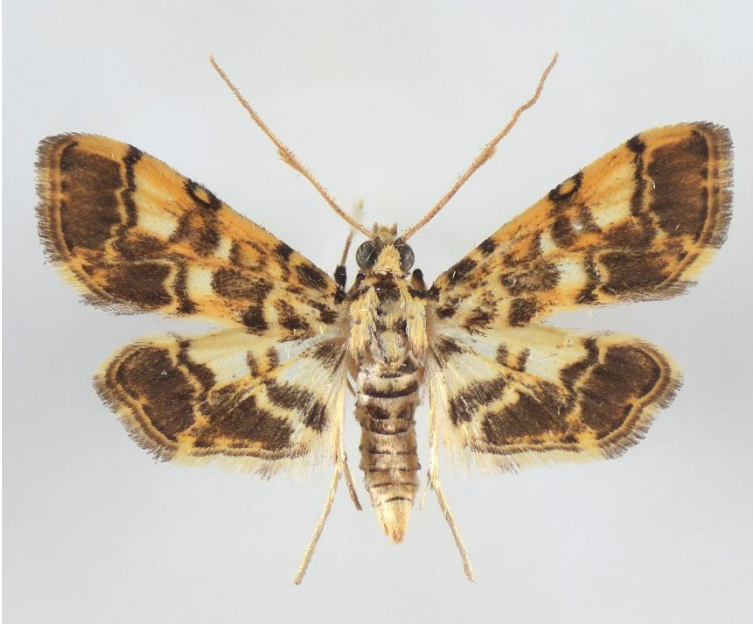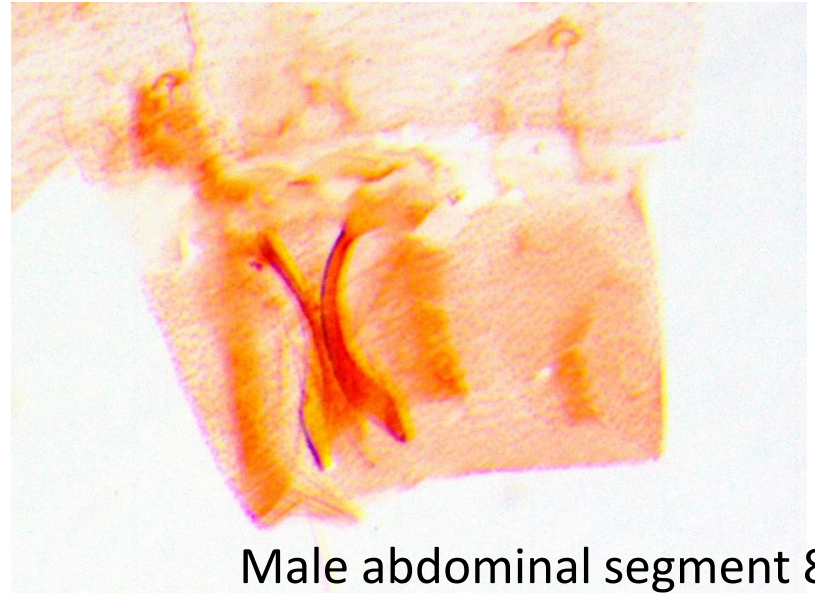

Male abdominal segment 8

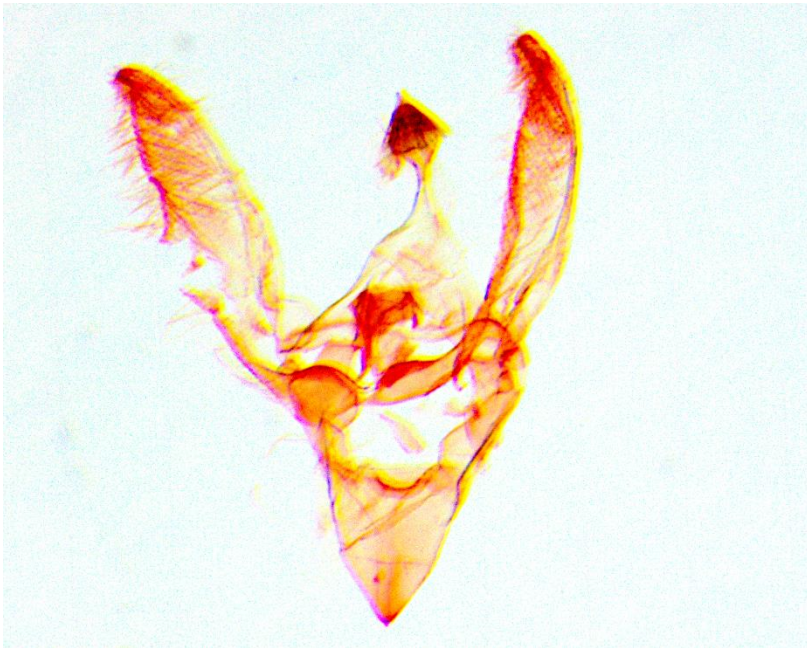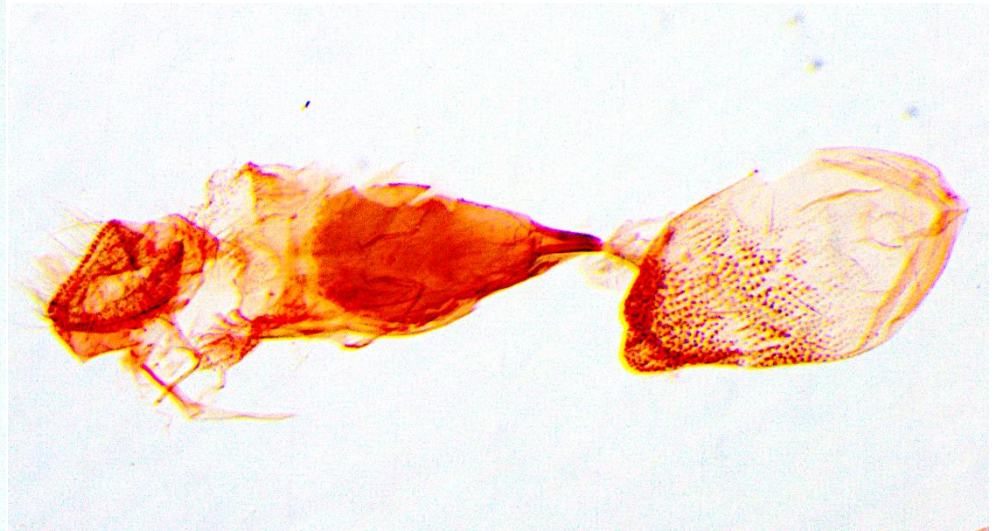



# *Glycythyma chrysorycta*

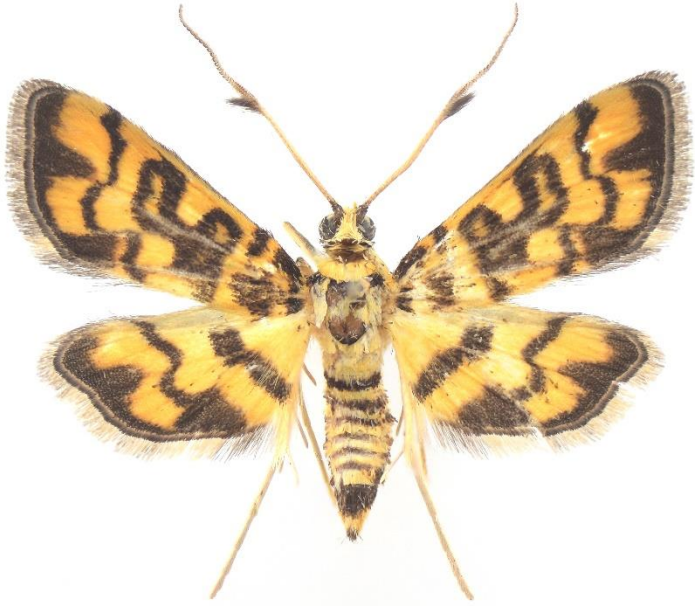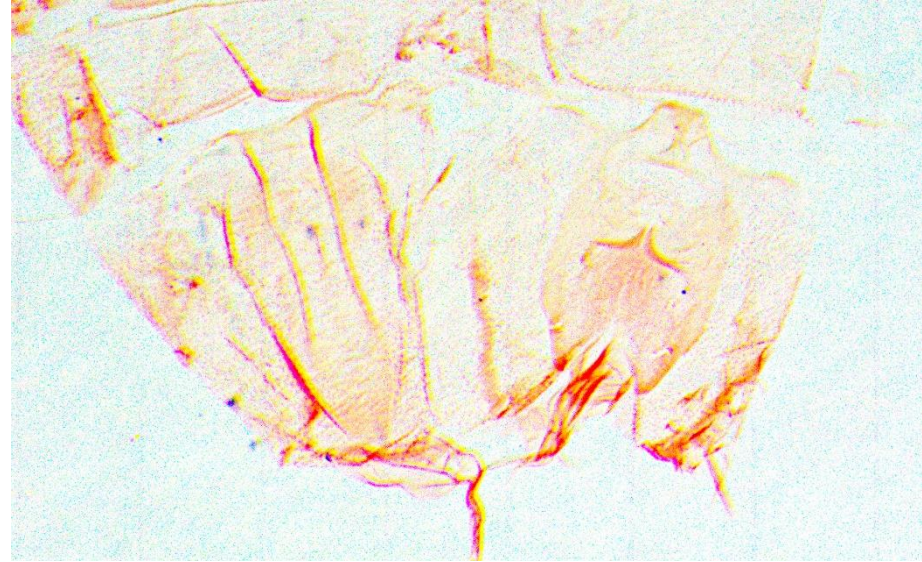

Male abdominal segment 8

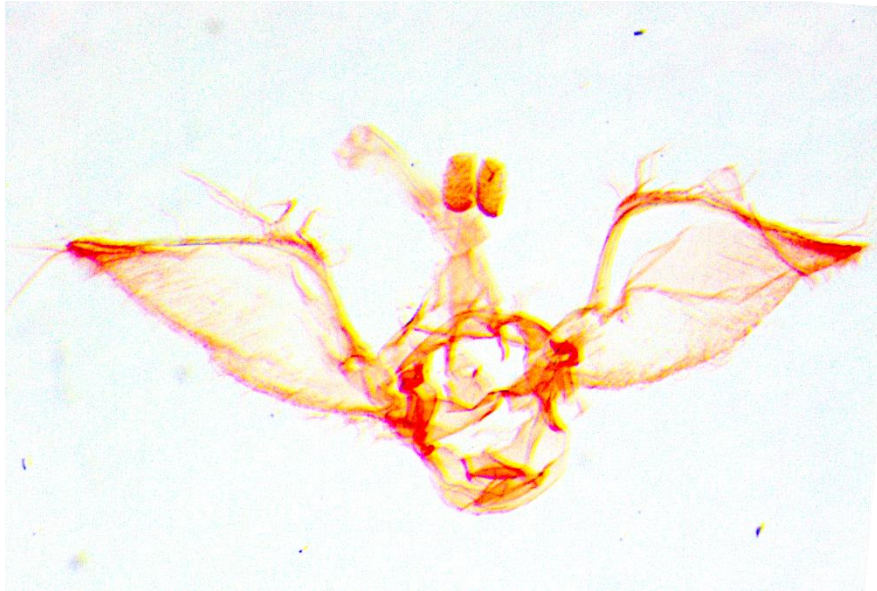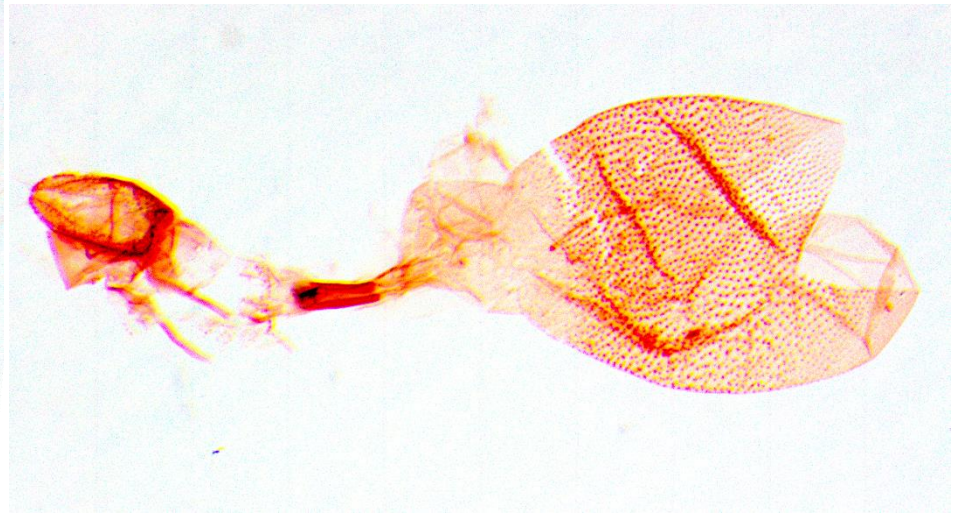



# *Piletocera aegimiusalis*

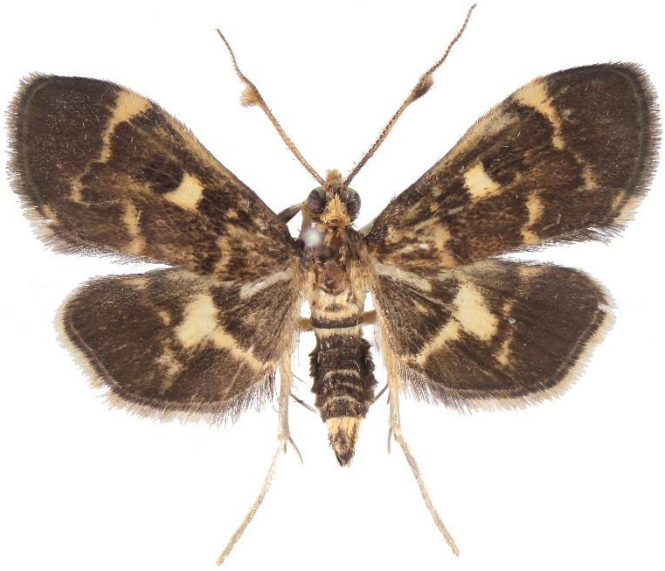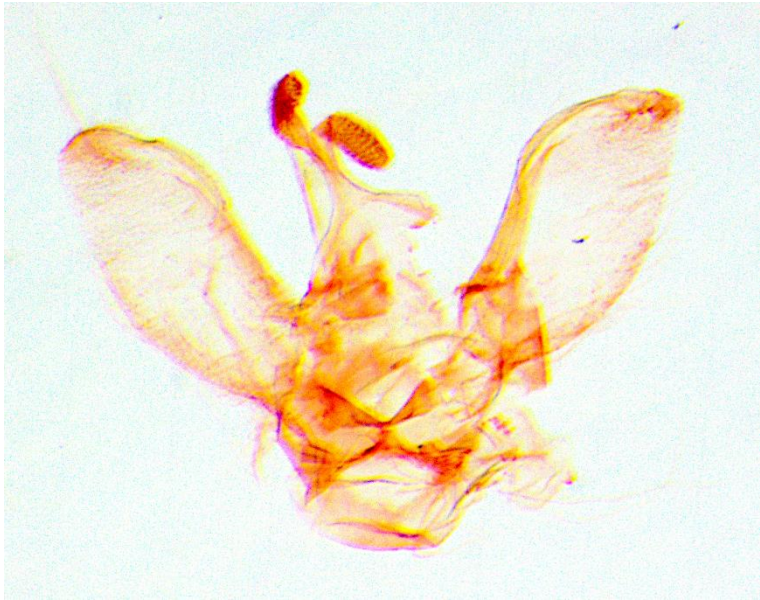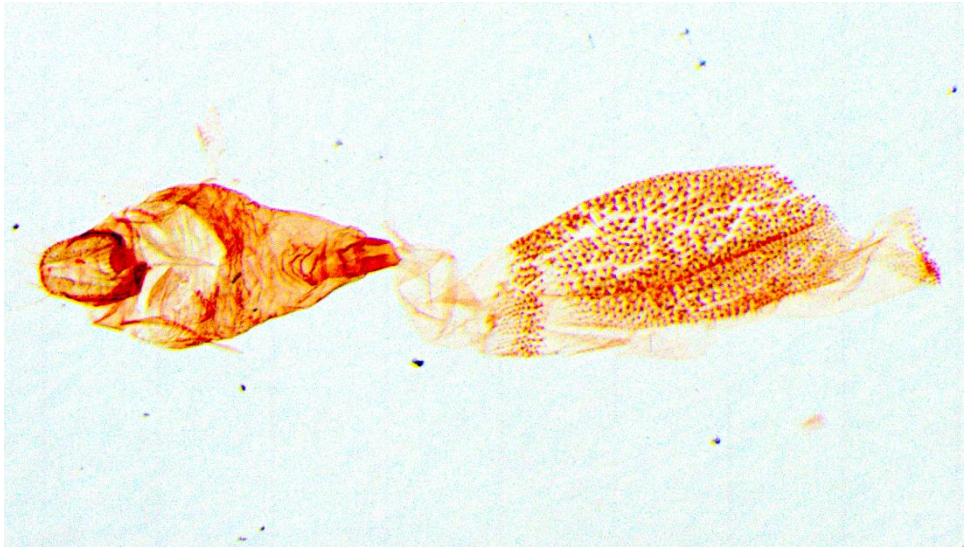

# *Nacoleia charesalis*

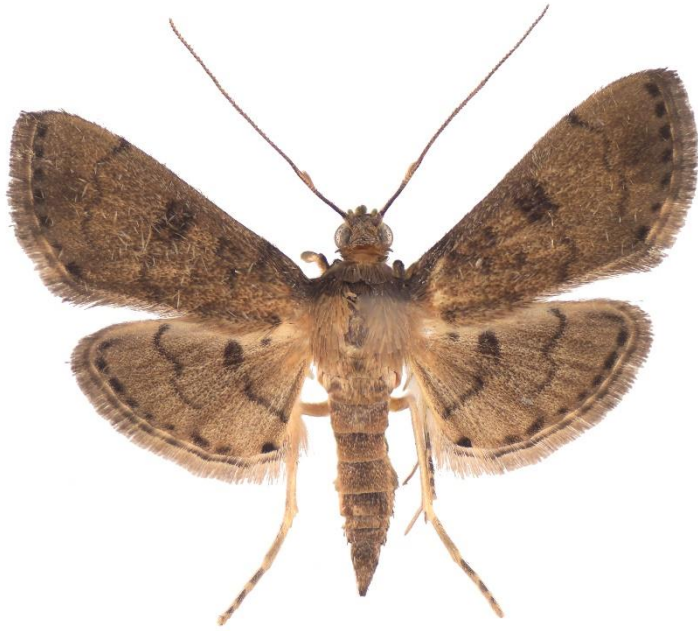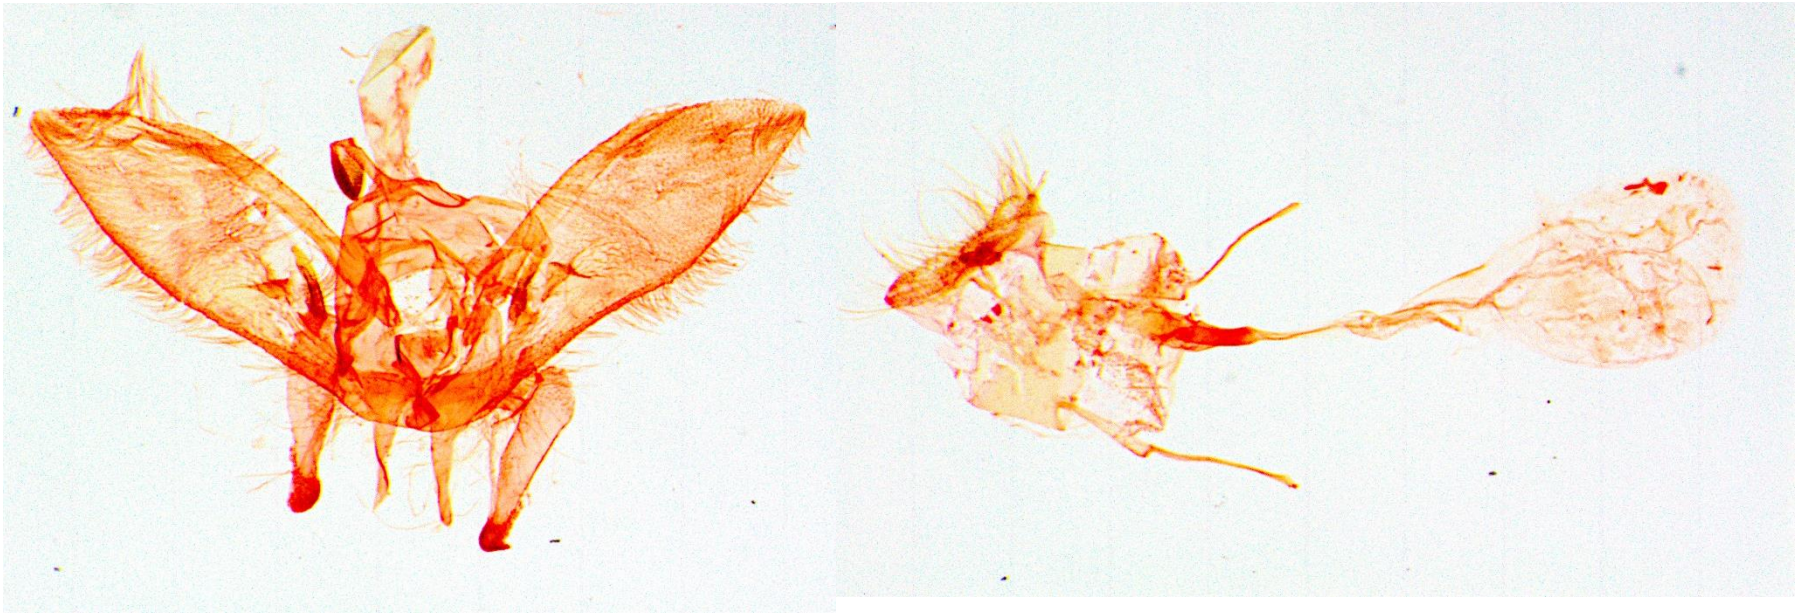



# *Hemopsis* nr. *dissipatalis*

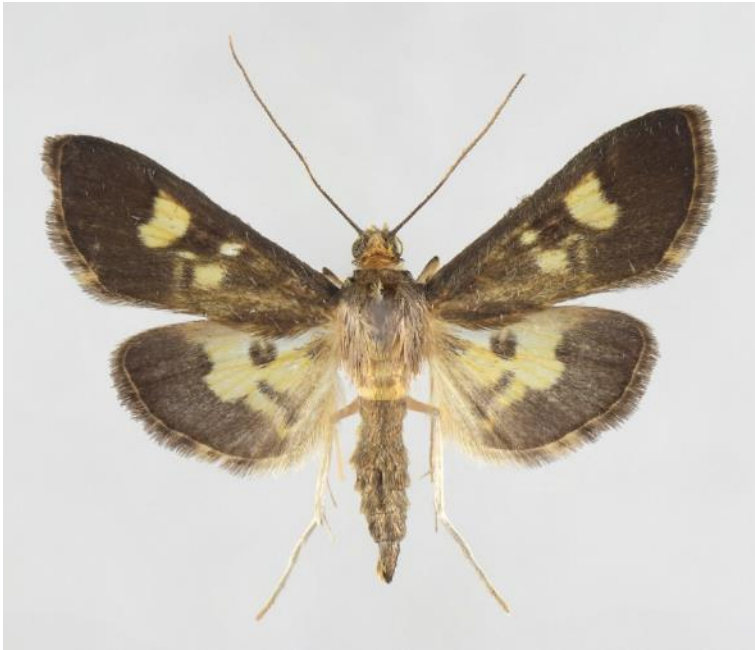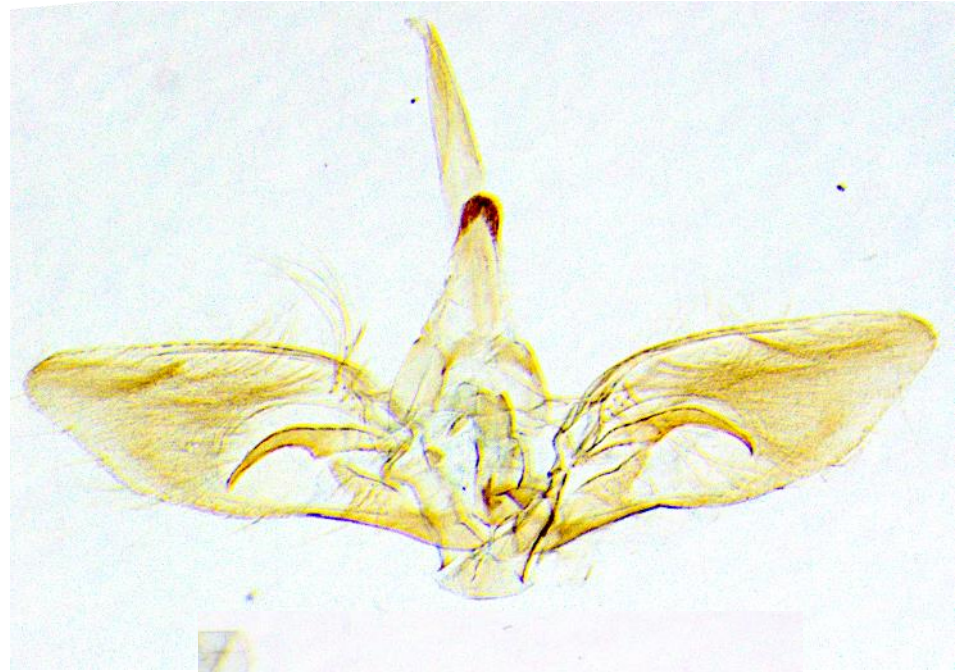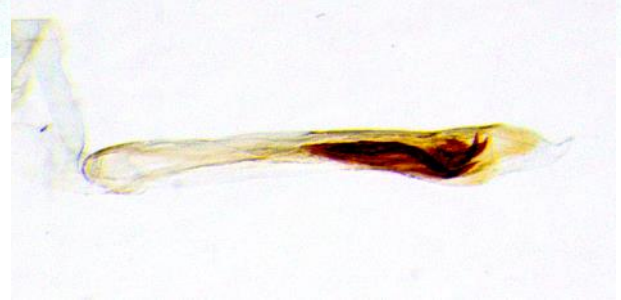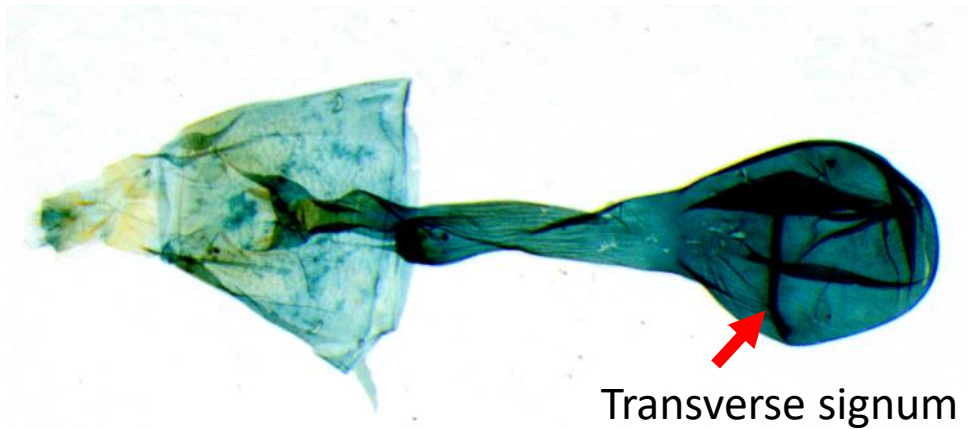

Transverse signum

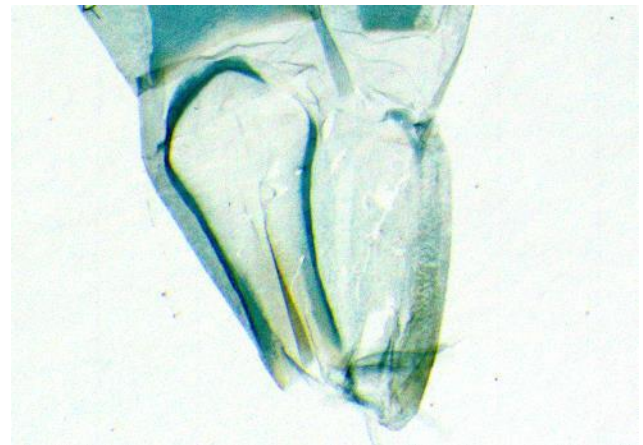

# *Mecyna tricolor*

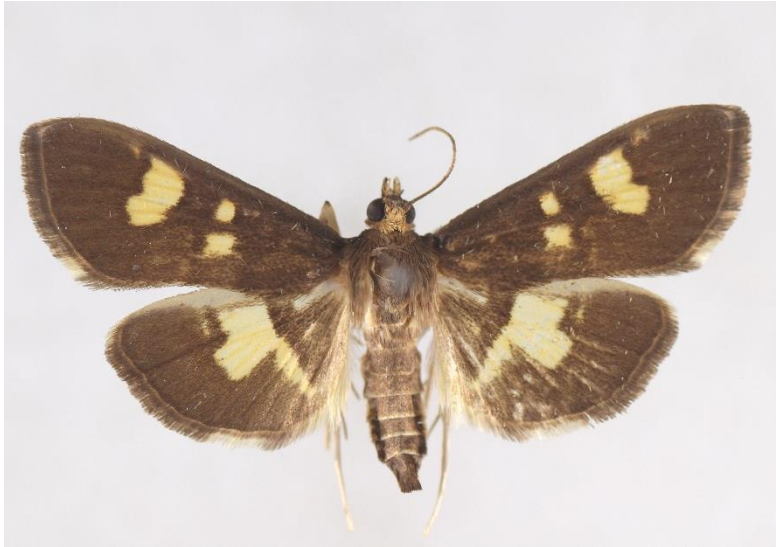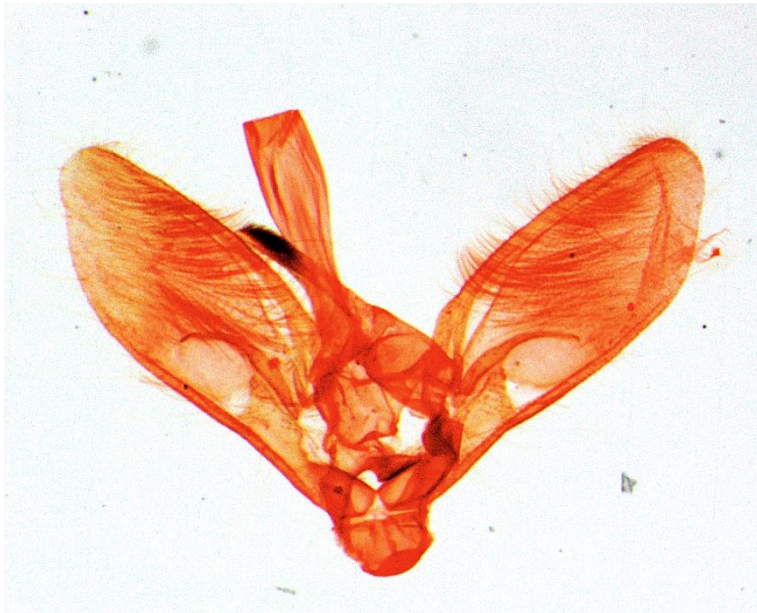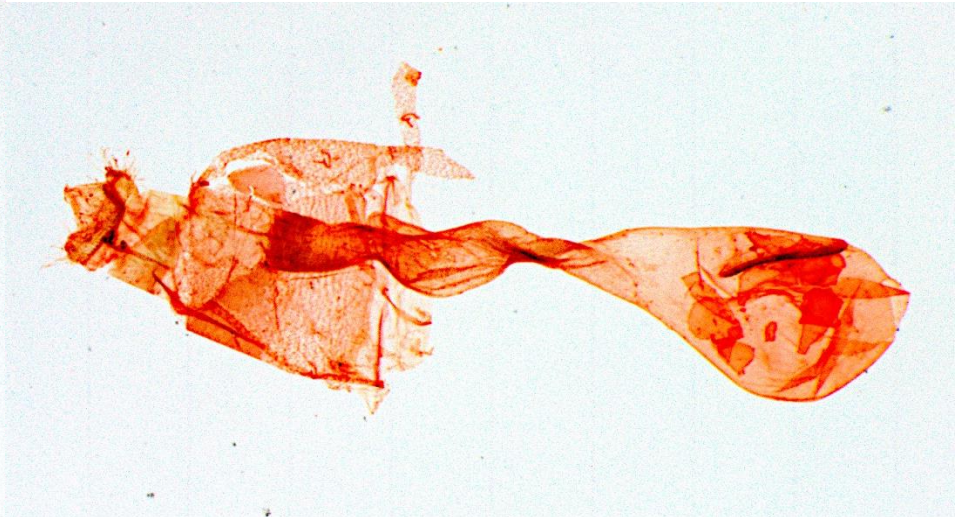



# *Syllepte invalidalis*

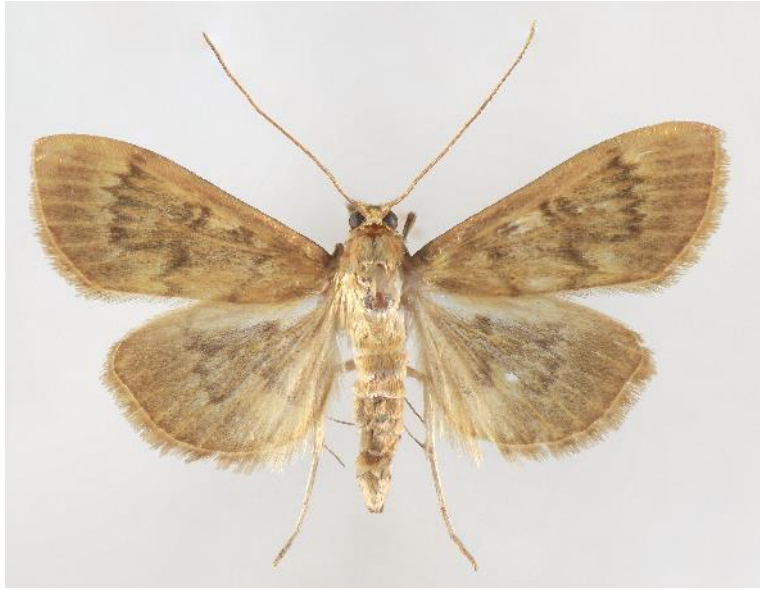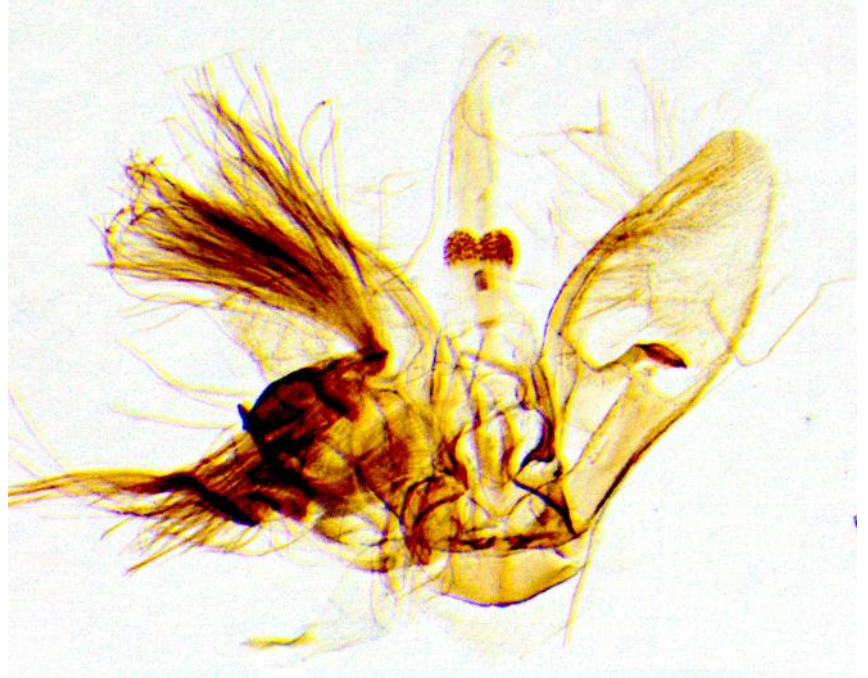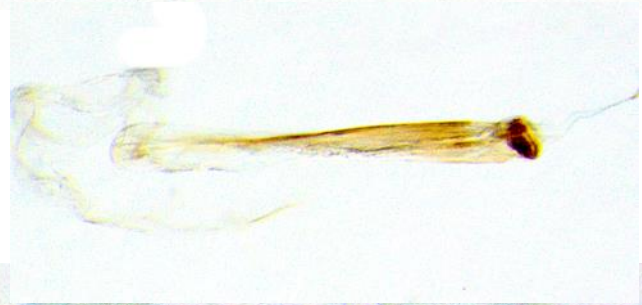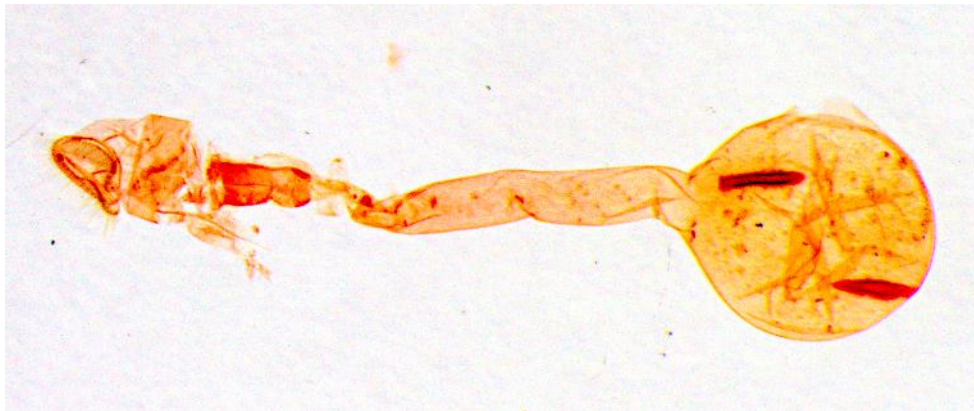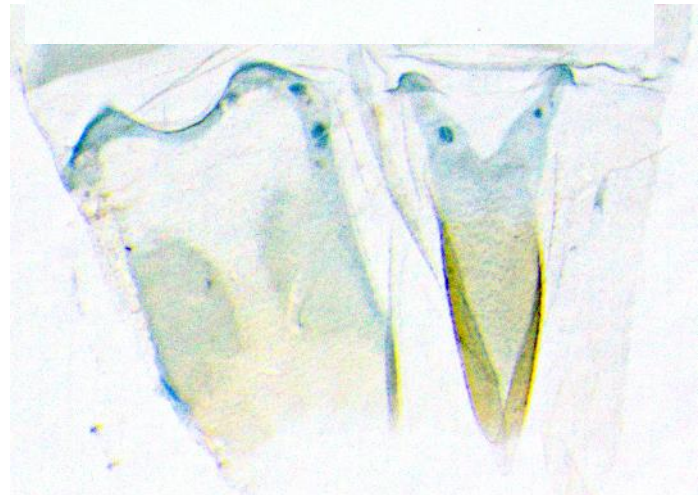



# *Syllepte signalis*

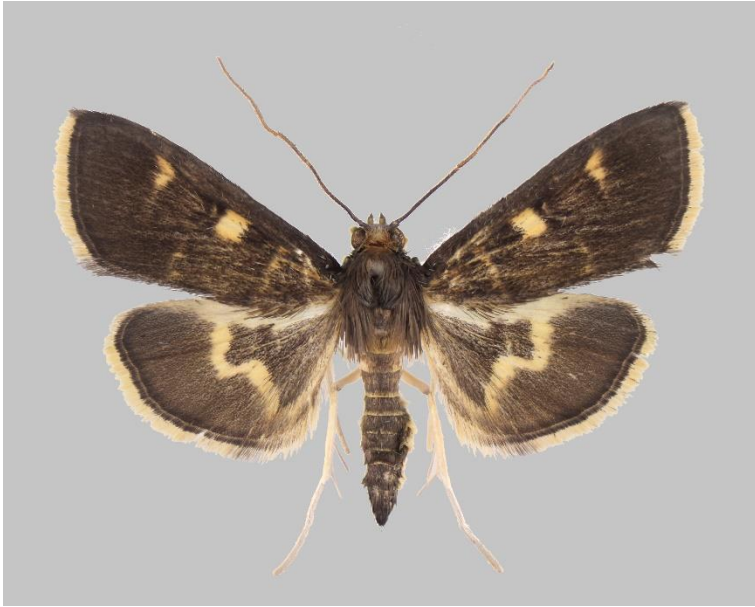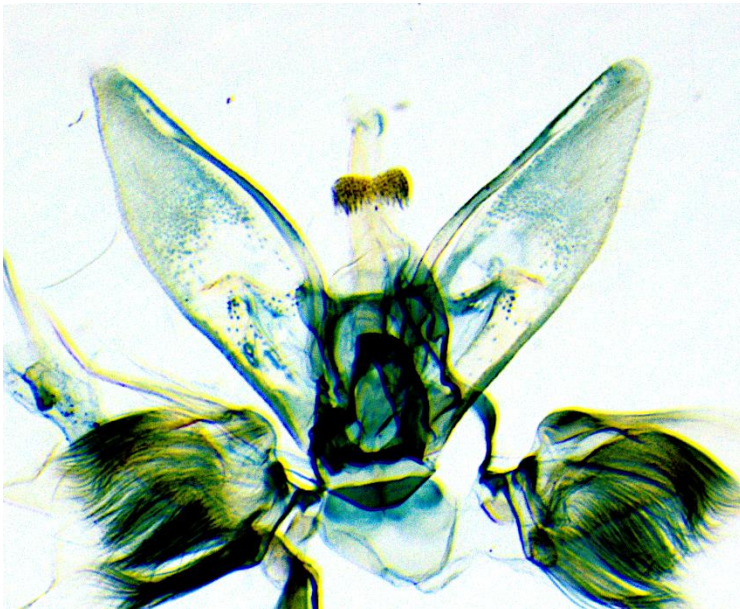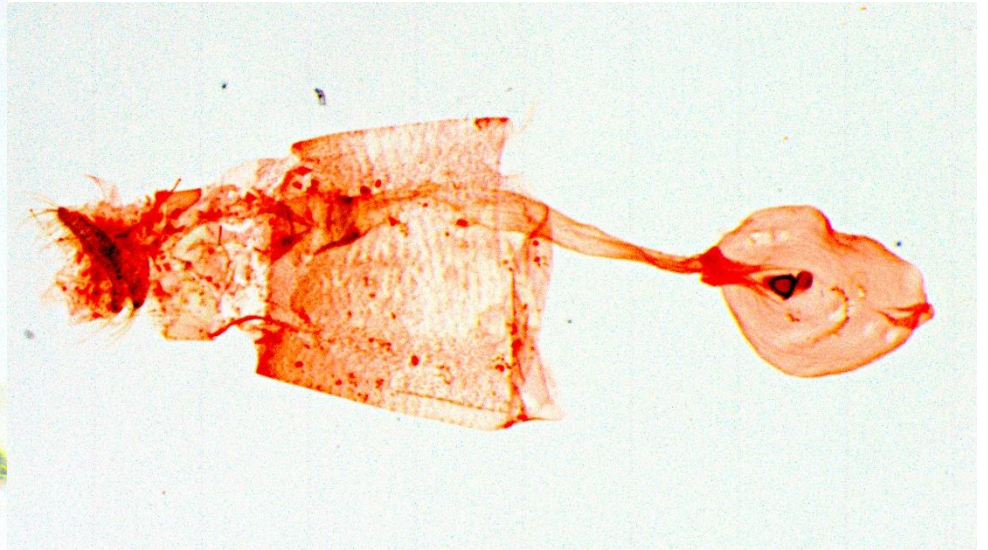



# *Syllepte fuscoinvalidalis*

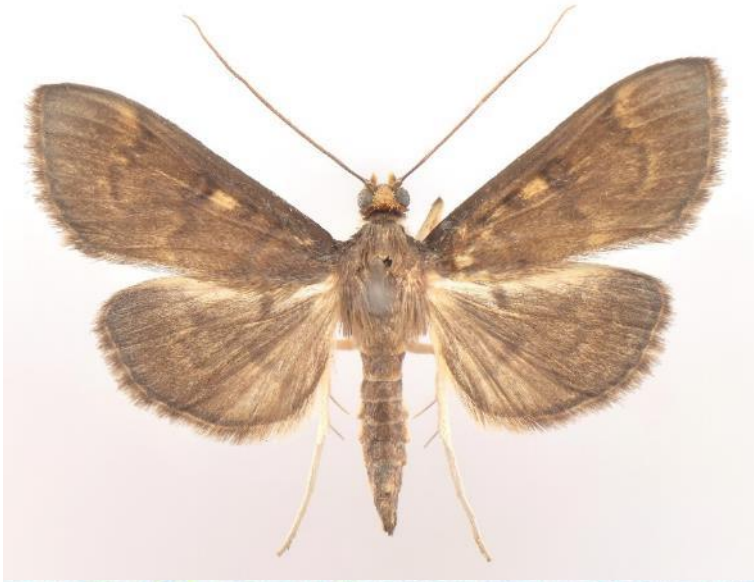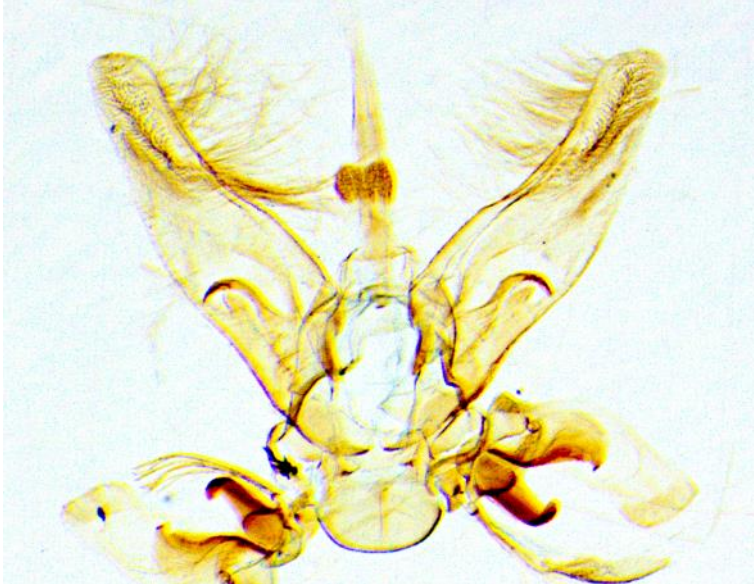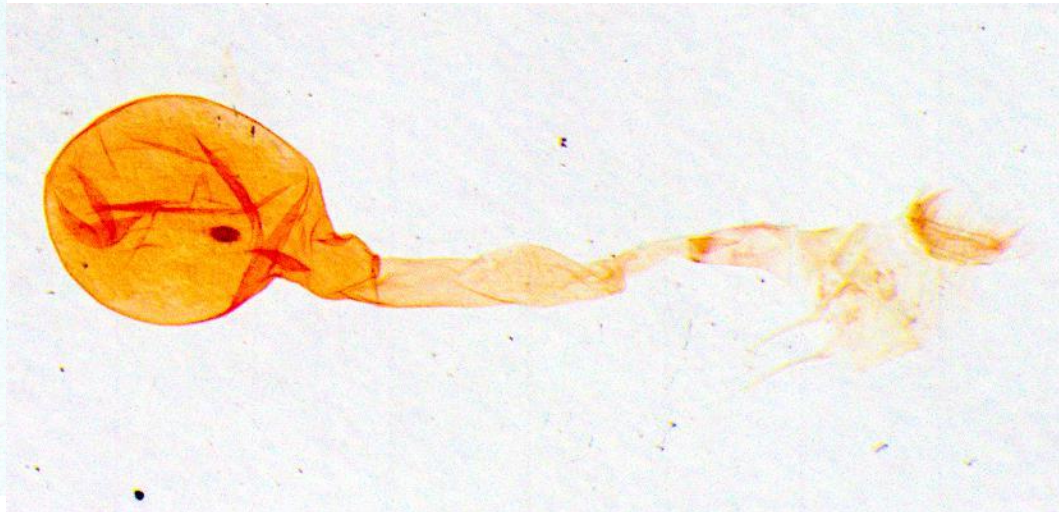

# *Syllepte pallidinotalis*

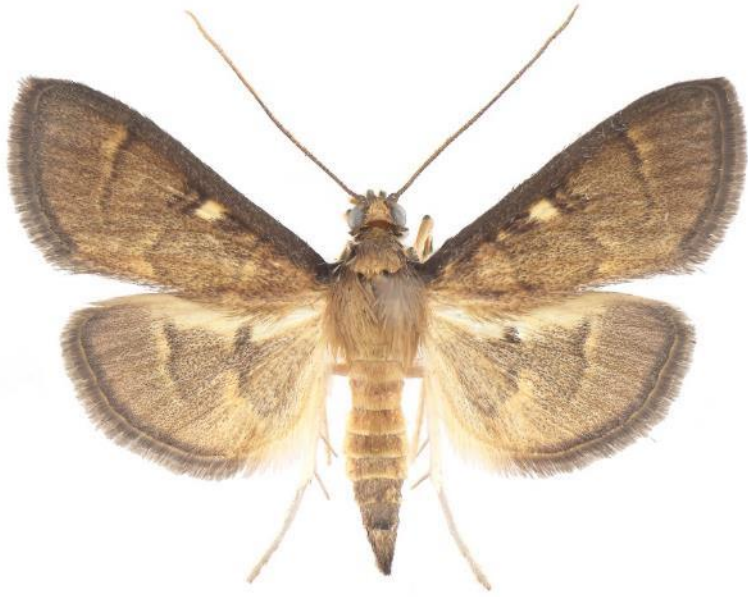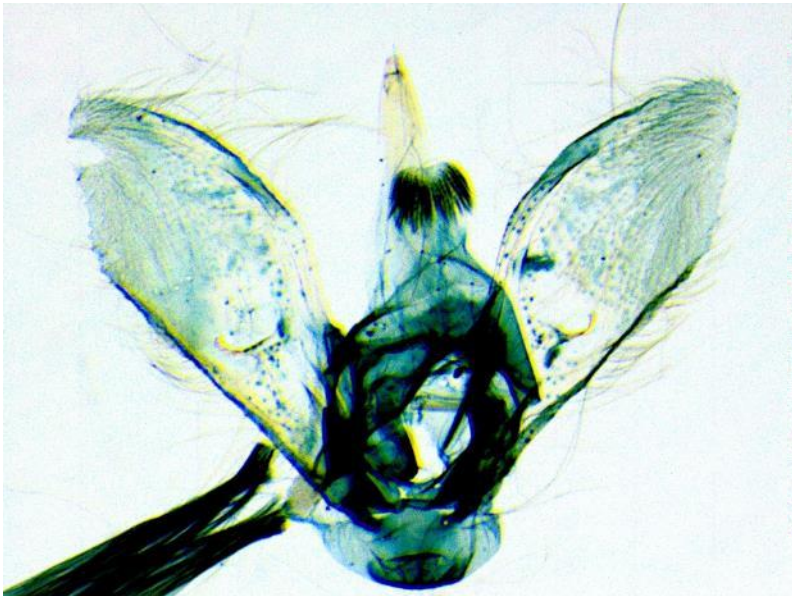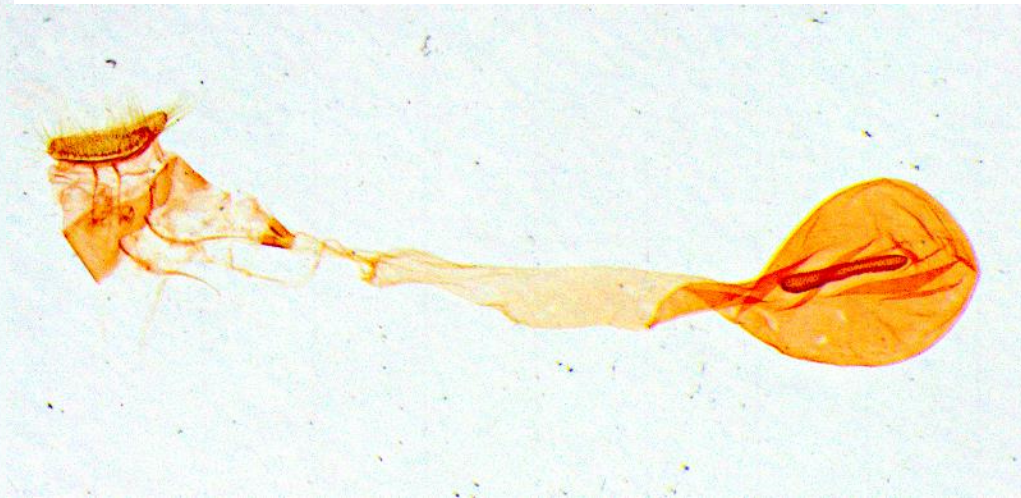



# *Herpetogramma luctuosalis*

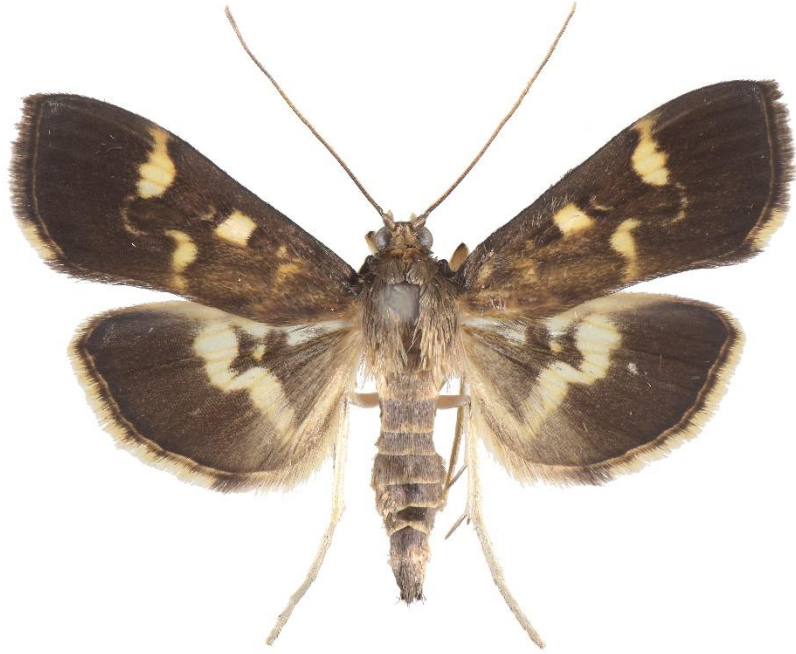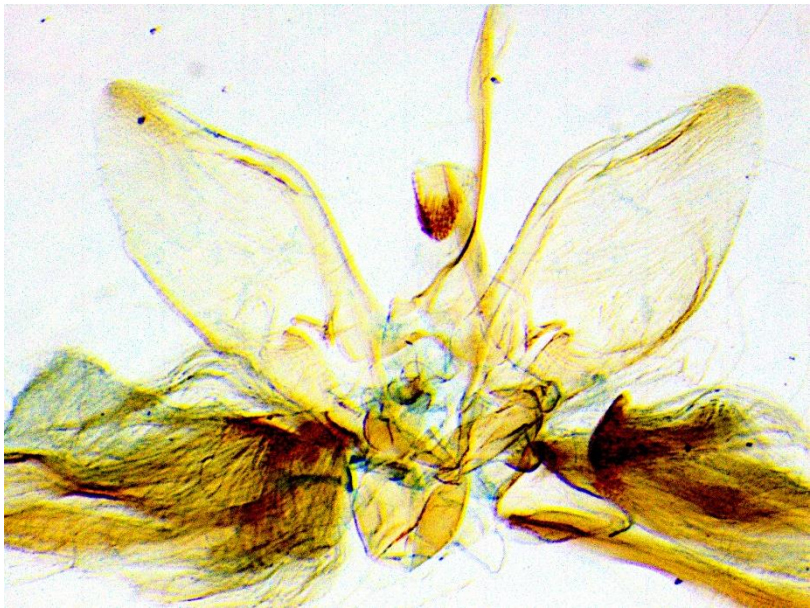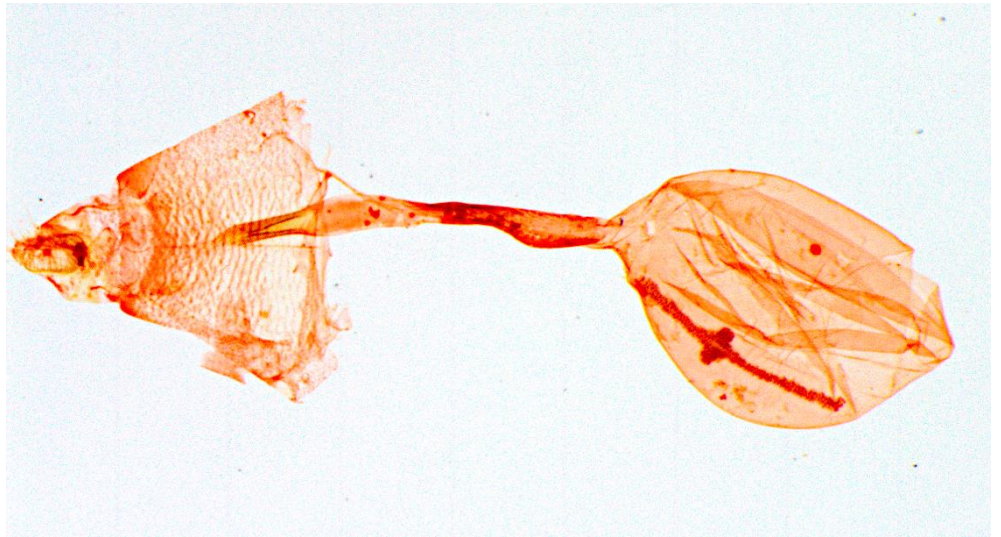



# *Goniorhynchus butyrosa*

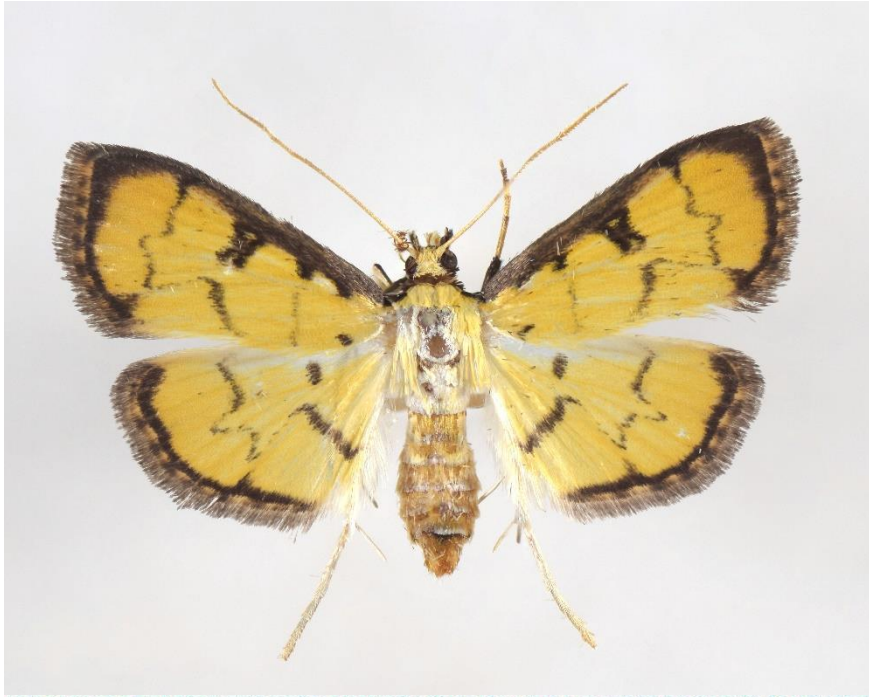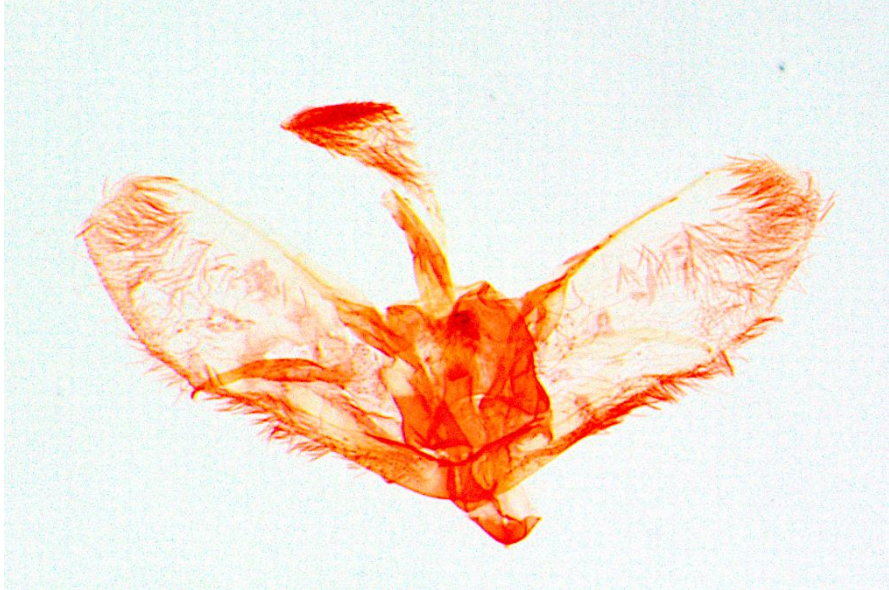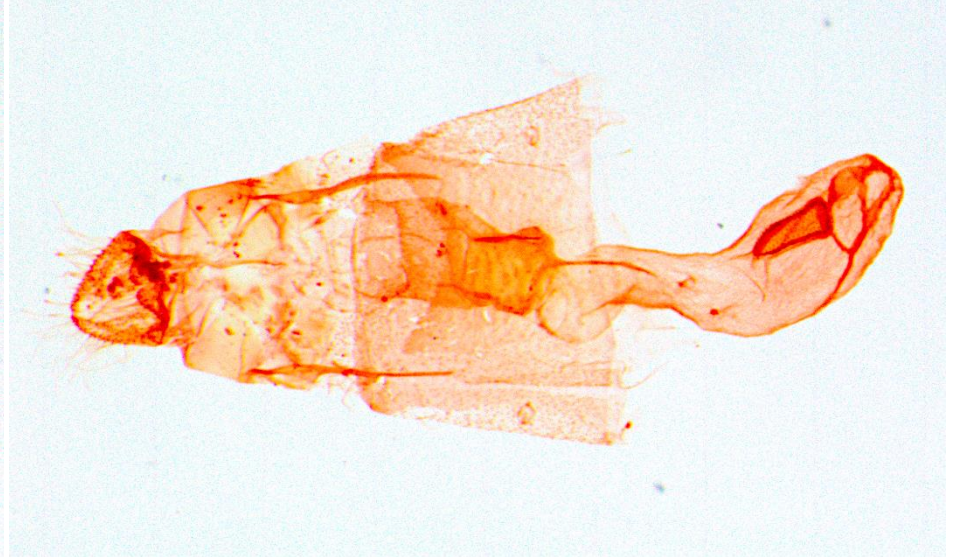



# *Goniorhynchus exemplaris*

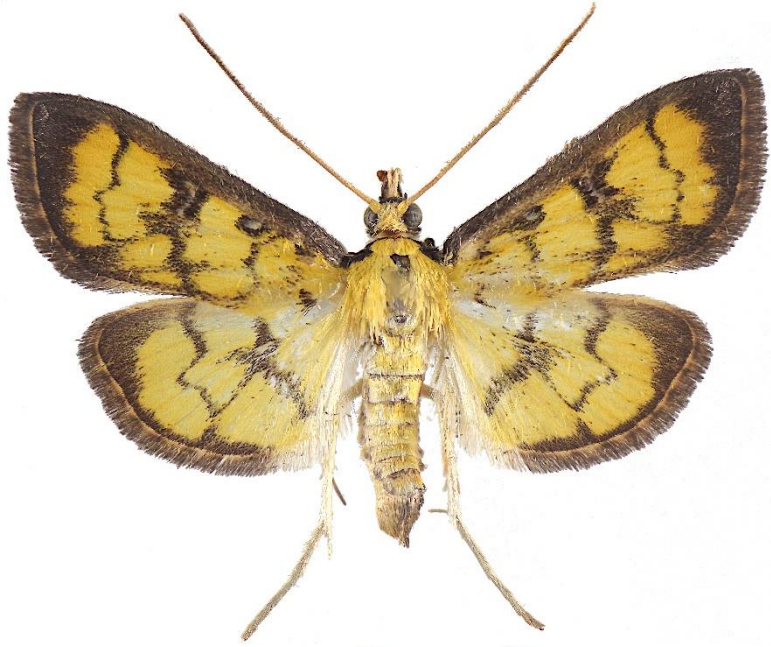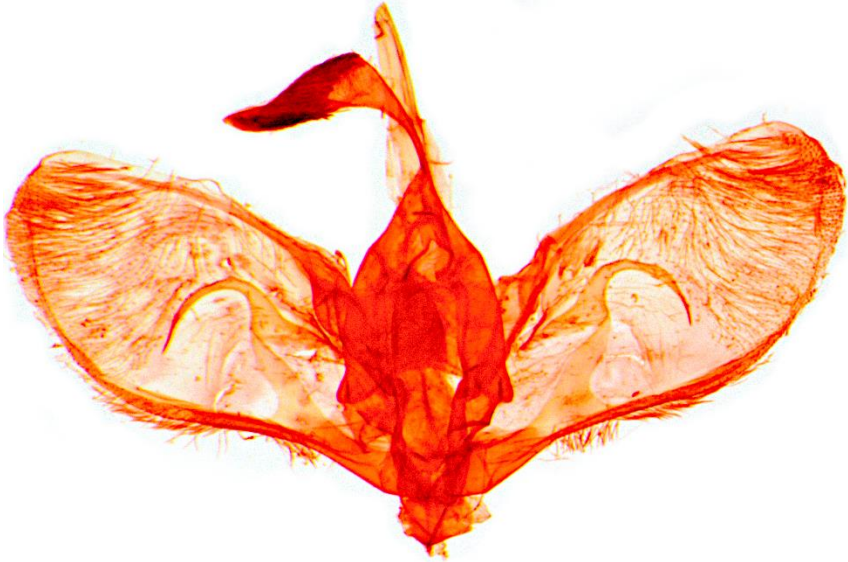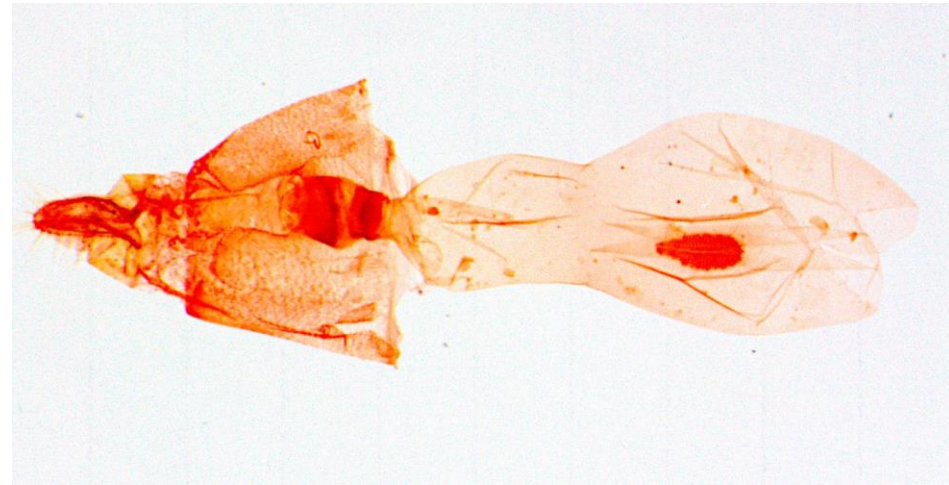

# *Lipararchis tranquillalis*

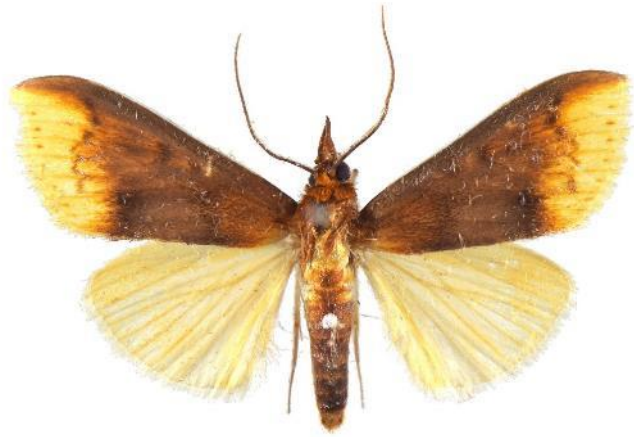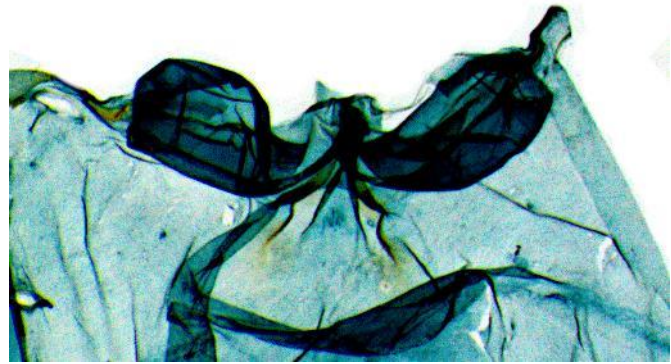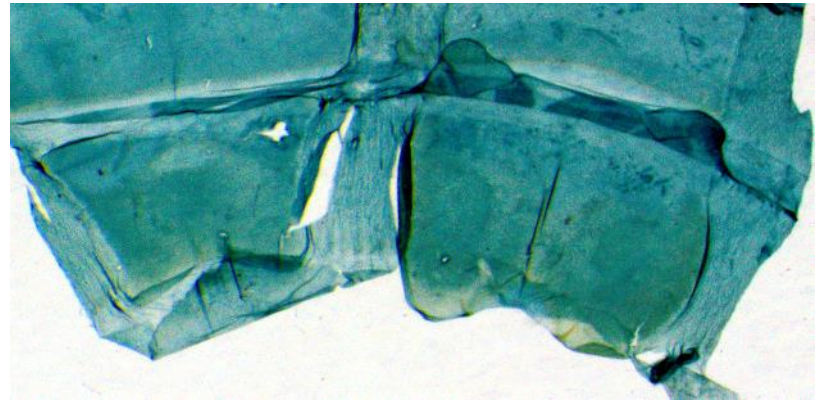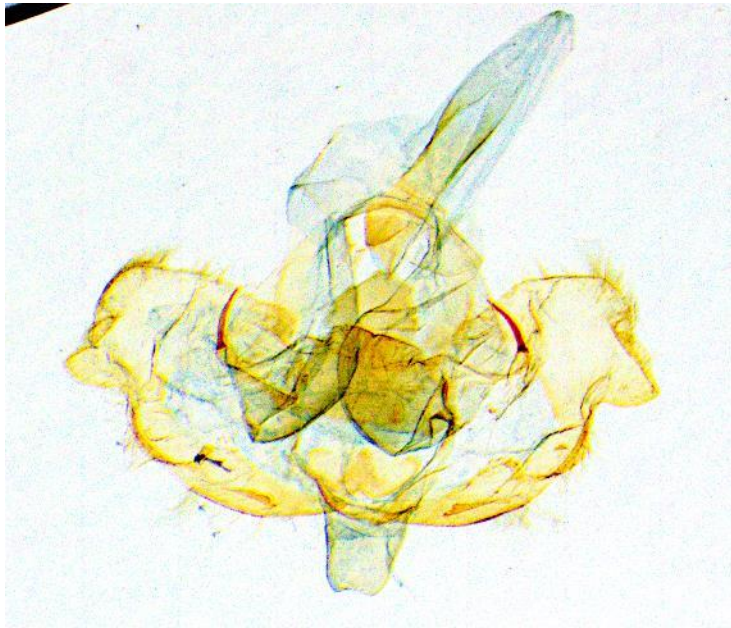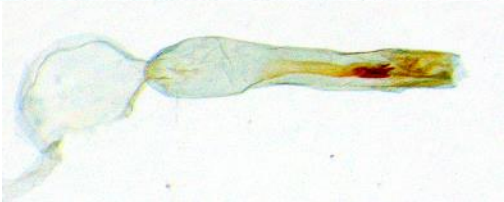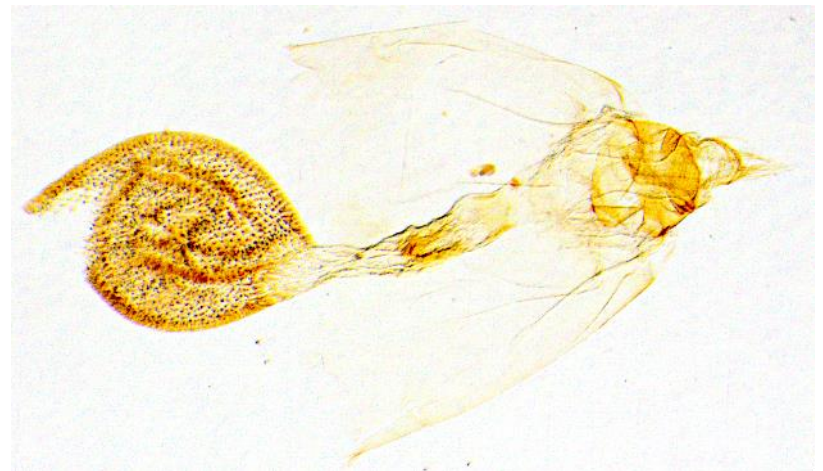

Supplement: Supplementary file 1 [file 1]
